# Supplementary material for: Global within-species phylogenetics of sewage microbes suggest that local adaptation shapes geographical bacterial clustering
Source: Research Square preprint supplement (doi:10.21203/rs.3.rs-1321305/v1), 2022-02-22
Supplement: Supplementary file 3 [file e940d0e6b2decbdeb4e4da1e.xlsx]

## Sheet: R2 statistics
Cluster/MAG species	Kruskal test		Wilcoxon Rank Sum Test
	p value	chi_sq	Membrane vs. Metabolic				Membrane vs. Organelle				Metabolic vs Organelle
			p value	test statistic	lower CI	Upper CI	p value	test statistic	lower CI	Upper CI	p value	test statistic	lower CI	Upper CI
C1	0.10378	6.333	NA	NA	NA	NA	NA	NA	NA	NA	NA	NA	NA	NA
C2	0.24558	4.195	NA	NA	NA	NA	NA	NA	NA	NA	NA	NA	NA	NA
C3	0.02404	10.228	1	290537.5	-0.00382	0.02652	0.00511	9170	0.02195	0.09064	0.01902	68272.5	0.01307	0.07737
C4	0.95363	0.095	NA	NA	NA	NA	NA	NA	NA	NA	NA	NA	NA	NA
C5	0.0315	9.453	1	251589.5	-0.01571	0.0281	0.00511	10679.5	0.02186	0.1112	0.01252	74164	0.01614	0.10371
C6	0.58533	1.565	NA	NA	NA	NA	NA	NA	NA	NA	NA	NA	NA	NA
C7	0.07815	7.234	NA	NA	NA	NA	NA	NA	NA	NA	NA	NA	NA	NA
C8	0.01478	11.469	1	372042.5	-0.02632	0.01534	0.01099	10148.5	0.01719	0.11998	0.00322	88830	0.0264	0.11907
C9	0.73535	0.812	NA	NA	NA	NA	NA	NA	NA	NA	NA	NA	NA	NA
C11	0.27819	3.71	NA	NA	NA	NA	NA	NA	NA	NA	NA	NA	NA	NA
C12	0.08238	6.954	NA	NA	NA	NA	NA	NA	NA	NA	NA	NA	NA	NA
C13	0.00068	18.3	1	86175.5	-0.00454	0.03982	0.00021	4284	0.03694	0.10399	0.00045	52986.5	0.01859	0.07795
C14	1e-05	29.533	1	307886	-0.00201	0.00907	0	10487	0.2188	0.43994	0	83963	0.19274	0.38779
C15	0.19064	4.83	NA	NA	NA	NA	NA	NA	NA	NA	NA	NA	NA	NA
C16	0.51682	2.26	NA	NA	NA	NA	NA	NA	NA	NA	NA	NA	NA	NA
C17	0.1837	5.042	NA	NA	NA	NA	NA	NA	NA	NA	NA	NA	NA	NA
C18	0.54249	1.832	NA	NA	NA	NA	NA	NA	NA	NA	NA	NA	NA	NA
C20	0.73535	0.824	NA	NA	NA	NA	NA	NA	NA	NA	NA	NA	NA	NA
C21	0.54249	1.962	NA	NA	NA	NA	NA	NA	NA	NA	NA	NA	NA	NA
C22	0.59613	1.45	NA	NA	NA	NA	NA	NA	NA	NA	NA	NA	NA	NA
C23	0.2659	3.914	NA	NA	NA	NA	NA	NA	NA	NA	NA	NA	NA	NA
C24	0	33.006	1	1373360	-0.00367	0.01551	0	30576.5	0.11181	0.23462	0	153082.5	0.10027	0.21815
C25	0.90506	0.329	NA	NA	NA	NA	NA	NA	NA	NA	NA	NA	NA	NA
C28	0.73535	0.942	NA	NA	NA	NA	NA	NA	NA	NA	NA	NA	NA	NA
C29	0.07587	7.484	NA	NA	NA	NA	NA	NA	NA	NA	NA	NA	NA	NA
C30	0.52158	2.144	NA	NA	NA	NA	NA	NA	NA	NA	NA	NA	NA	NA
C31	0.54249	1.799	NA	NA	NA	NA	NA	NA	NA	NA	NA	NA	NA	NA
C32	0.91757	0.236	NA	NA	NA	NA	NA	NA	NA	NA	NA	NA	NA	NA
C34	0.00046	19.546	1	513305.5	-0.02568	0.03132	0.00016	14573	0.06178	0.20033	1e-04	129485.5	0.06803	0.19011
C37	0.00415	14.316	0.10038	654610.5	0.00032	0.02654	0.00136	14269.5	0.01531	0.05774	0.03402	120478.5	3e-05	0.04383
C38	1e-05	28.264	0.07626	350173	6e-05	0.01166	0	12186	0.06663	0.14885	0.00015	74353	0.00021	0.13326
C41	0.36362	3.066	NA	NA	NA	NA	NA	NA	NA	NA	NA	NA	NA	NA

## Sheet: gene variance statistics
Cluster/MAG species	Kruskal test		Wilcoxon Rank Sum Test
	p value	chi_sq	Membrane vs. Metabolic				Membrane vs. Organelle				Metabolic vs Organelle
			p value	test statistic	lower CI	Upper CI	p value	test statistic	lower CI	Upper CI	p value	test statistic	lower CI	Upper CI
C1	3e-05	22.049	1	177990	-0.00026	0.00185	3e-05	7459	0.00205	0.00787	7e-05	68212.5	0.00151	0.00476
C2	0	40.394	0.61758	418201.5	-3e-05	0.002	0	15456	0.00508	0.00923	0	110184	0.00387	0.00823
C3	0.00182	13.077	0.46471	301008.5	1e-05	0.00035	0.00213	10246	0.00028	0.00095	0.01482	76478	0.00013	0.00071
C4	0.00023	17.659	1	284355	-0.00054	0.00016	0.00166	10070	0.00039	0.00156	0.00021	95088	0.00052	0.00176
C5	0	28.678	1	252400.5	-0.00025	4e-04	0	12099	0.00089	0.00234	0	84824	0.00081	0.00221
C6	0.00162	13.431	0.28707	209322.5	8e-05	0.00081	0.00198	7705	0.00042	0.00222	0.04011	61702	1e-04	0.00096
C7	0	31.557	0.3111	517062.5	5e-05	0.00053	0	17944	0.00078	0.00169	0	147891	0.00054	0.00136
C8	0.00073	15.113	1	367105	-0.00018	7e-05	0.00294	10443	0.00012	0.00066	0.00055	91357.5	0.00019	0.00079
C9	1e-05	23.578	0.01296	356515.5	0.00013	0.00047	7e-05	11436.5	3e-04	0.00121	0.01547	90917	1e-05	0.00055
C11	0.00689	10.168	1	329644	-1e-05	3e-05	0.00404	14483.5	4e-05	0.00028	0.01288	107352	1e-05	0.00019
C12	0	45.104	1	164101.5	-0.00016	0.00055	0	10420.5	0.00137	0.00242	0	89306	0.00122	0.00221
C13	0	27.46	0.10083	94041.5	6e-05	0.00024	0	4531	0.00021	0.00051	0.00018	53994	0.00011	0.00028
C14	0	33.349	1	297897.5	-0.00101	0.00085	0	10583	0.00324	0.00679	0	86011	0.00337	0.00693
C15	0	68.282	1	376255.5	-0.00155	0.00065	0	17134.5	0.00648	0.0101	0	120122.5	0.00659	0.01075
C16	1e-05	25.417	1	268049	-0.00026	8e-05	8e-05	13026.5	0.00025	0.00085	0	106272	0.00028	0.00105
C17	0	31.312	0.55748	284349.5	0	0.00069	0	11982	0.00111	0.00403	0	79116.5	0.00061	0.00285
C18	0	70.52	1	197416.5	-0.00213	0.00051	0	11095.5	0.00842	0.01267	0	90375	0.00926	0.01363
C20	0	35.61	1	307793	-8e-05	0.00032	0	16791	0.00075	0.00146	0	101891.5	0.00062	0.00132
C21	0	112.474	1	354206.5	-0.00028	0.00109	0	16166.5	0.00775	0.00993	0	127874.5	0.00727	0.00951
C22	0.00031	16.97	1	200245.5	-0.00035	0.00082	0.00037	6790	0.00082	0.00317	0.00027	98055.5	0.00071	0.0026
C23	0.31939	2.283	NA	NA	NA	NA	NA	NA	NA	NA	NA	NA	NA	NA
C24	0.00011	19.327	1	1356656	-0.00034	0.00065	1e-05	28829.5	0.00253	0.00566	0.00012	142275.5	0.00207	0.00553
C25	0.00064	15.47	1	179768	-0.00027	0.00011	0.0015	5452	4e-04	0.00132	5e-04	41631	0.00048	0.0014
C28	0.3138	2.382	NA	NA	NA	NA	NA	NA	NA	NA	NA	NA	NA	NA
C29	0.00689	10.151	1	262111	-0.00016	0.00047	0.00404	10273	0.00026	0.00298	0.00966	67140.5	0.00018	0.00253
C30	0.01383	8.691	1	1412881.5	-0.00035	9e-05	0.03444	33510.5	0.00026	0.00196	0.01824	173973	0.00036	0.00211
C31	0	68.883	1	167729	-0.00216	0.00026	0	11098.5	0.00632	0.01036	0	77695	0.00735	0.01138
C32	0	51.006	1	196950.5	-0.00042	0.00094	0	11537	0.00267	0.00524	0	73813.5	0.00243	0.00466
C34	0	80.823	0.28707	577895.5	0.00014	0.00119	0	19005.5	0.00396	0.00595	0	161948	0.00324	0.00512
C37	0	32.48	0.3593	665206.5	0	0.00035	0	16380.5	0.00066	0.00134	0	142847	0.00047	0.00117
C38	0.00182	13.032	0.68021	347360.5	-8e-05	0.00014	0.00115	11921	0	0.00077	0.00966	73507	3e-05	0.00057
C41	0.00612	10.532	1	192573.5	-3e-05	0.00016	0.00342	7093.5	4e-05	0.00065	0.01091	60013	3e-05	0.00047

## Sheet: dnds statistcs
Cluster/MAG species	Kruskal test		Wilcoxon Rank Sum Test
	p value	chi_sq	Membrane vs. Metabolic				Membrane vs. Organelle				Metabolic vs Organelle
			p value	test statistic	lower CI	Upper CI	p value	test statistic	lower CI	Upper CI	p value	test statistic	lower CI	Upper CI
C3	0.00267	12.66	1	88150.5	-2e-05	3e-05	0.04735	4553	2e-05	0.14684	0.00238	41493.5	2e-05	0.15423
C5	0.00334	11.906	1	66393.5	0	6e-05	0.02332	4290	3e-05	0.07493	0.00238	29645	4e-05	0.07366
C8	0.91411	0.18	NA	NA	NA	NA	NA	NA	NA	NA	NA	NA	NA	NA
C13	0.01704	8.38	0.3478	71761	-5e-05	0.17893	0.04715	3386	3e-05	0.39654	0.09681	42924.5	6e-05	0.07568
C14	0.00011	20.365	1	211945	-0.03093	0.00322	5e-04	7997	0.03056	0.09851	0.00017	69016.5	0.03617	0.1118
C24	0.00029	17.452	0.00694	1117456.5	-0.00472	-6e-05	0.52719	21078	-6e-05	0.01303	0.08849	113739.5	6e-05	0.02317
C34	0	32.027	0.09636	457455	-0.02498	-4e-05	0.00022	14665	0.01697	0.05896	1e-05	132109.5	0.02382	0.07905
C37	5e-05	22.861	0.11698	519843	0	-3e-05	0.00345	13556.5	3e-05	2e-05	0.00021	131791.5	6e-05	0.01263
C38	0.00029	17.53	1	309943	-4e-05	6e-05	0.00035	11532	2e-05	0.03392	0.00021	75147	4e-05	0.02669

## Sheet: PERMANOVA statistics
	MAGs in tree	p value	R2 geography	F	df
C1	44	0.003	0.6	14.602	4
C2	33	0.003	0.673	11.101	5
C3	45	0.003	0.374	3.783	6
C4	37	0.003	0.288	4.459	3
C5	37	0.003	0.621	13.108	4
C6	31	0.557	0.094	0.932	3
C7	25	0.107	0.231	1.499	4
C8	19	0.003	0.568	6.587	3
C9	15	0.147	0.213	1.62	2
C11	19	0.097	0.301	2.154	3
C12	23	0.003	0.642	11.37	3
C13	18	0.003	0.36	2.63	3
C14	10	0.025	0.963	206.083	1
C15	15	0.003	0.435	2.827	3
C16	17	0.118	0.438	3.382	3
C17	10	0.003	0.634	3.465	3
C18	7	0.071	0.365	2.87	1
C20	15	0.097	0.44	1.416	5
C21	14	0.097	0.395	1.469	4
C22	12	0.271	0.302	1.156	3
C23	8	0.244	0.25	1.997	1
C24	16	0.003	0.553	8.044	2
C25	7	0.107	0.316	2.306	1
C26	8	0.104	0.716	6.299	2
C28	9	0.108	0.563	3.858	2
C29	10	0.845	0.167	0.703	2
C30	10	0.961	0.137	0.555	2
C31	8	0.108	0.475	5.423	1
C32	7	0.209	0.455	1.668	2
C34	7	0.063	0.509	5.188	1
C37	8	0.344	0.467	1.167	3
C38	6	0.244	0.797	5.88	2
C41	4	1	0.228	0.591	1
