# Supplementary material for: Global within-species phylogenetics of sewage microbes suggest that local adaptation shapes geographical bacterial clustering
Source: Research Square preprint supplement (doi:10.21203/rs.3.rs-1321305/v1), 2022-02-22
Supplement: Supplementary file 4 [file 1ee705390a478d728f0893fa.xlsx]

## Sheet: Cluster taxonomy
cluster_no	superkingdom	phylum	class	order	family	genus	species
C1	Bacteria	Fusobacteriota	Fusobacteriia	Fusobacteriales	Leptotrichiaceae	NA	NA
C2	Bacteria	Proteobacteria	Gammaproteobacteria	Burkholderiales	Neisseriaceae	Neisseria	NA
C3	Bacteria	Firmicutes	Negativicutes	Veillonellales	Veillonellaceae	Veillonella	NA
C4	Bacteria	Firmicutes	Bacilli	Lactobacillales	Streptococcaceae	Lactococcus	Lactococcus raffinolactis
C5	Bacteria	Proteobacteria	Gammaproteobacteria	Burkholderiales	Burkholderiaceae	Brachymonas	NA
C6	Bacteria	Synergistota	Synergistia	Synergistales	Synergistaceae	Syner-03	Syner-03 sp002316795
C7	Bacteria	Desulfobacterota	Desulfobulbia	Desulfobulbales	Desulfobulbaceae	NA	NA
C8	Bacteria	Desulfobacterota	Desulfobulbia	Desulfobulbales	Desulfobulbaceae	ORNL	NA
C9	Bacteria	Firmicutes	Clostridia	Eubacteriales	Eubacteriaceae	UBA7485	NA
C10	Bacteria	Proteobacteria	Gammaproteobacteria	Burkholderiales	Neisseriaceae	Neisseria	NA
C11	Bacteria	Proteobacteria	Gammaproteobacteria	21-64-14	21-64-14	NA	NA
C12	Bacteria	Firmicutes	Negativicutes	Selenomonadales	NA	NA	NA
C13	Bacteria	Firmicutes	Clostridia	Saccharofermentanales	Saccharofermentanaceae	NA	NA
C14	Bacteria	Desulfobacterota	Desulfobulbia	Desulfobulbales	Desulfobulbaceae	ORNL	NA
C15	Bacteria	Proteobacteria	Gammaproteobacteria	Burkholderiales	Burkholderiaceae	Brachymonas	Brachymonas denitrificans
C16	Bacteria	Firmicutes	Clostridia	Lachnospirales	Lachnospiraceae	NA	NA
C17	Bacteria	Firmicutes	Negativicutes	Veillonellales	Veillonellaceae	Veillonella	NA
C18	Bacteria	Proteobacteria	Gammaproteobacteria	Pseudomonadales	Moraxellaceae	Moraxella	Moraxella
C19	Bacteria	Proteobacteria	Gammaproteobacteria	Burkholderiales	Burkholderiaceae	BOG-994	NA
C20	Bacteria	Firmicutes	Negativicutes	Selenomonadales	Selenomonadaceae	NA	NA
C21	Bacteria	Proteobacteria	Gammaproteobacteria	Pseudomonadales	Moraxellaceae	Acinetobacter	Acinetobacter harbinensis
C22	Archaea	Halobacterota	Methanosarcinia	Methanotrichales	Methanotrichaceae	Methanothrix	Methanothrix soehngenii
C23	Bacteria	Firmicutes	Bacilli	Lactobacillales	Streptococcaceae	Lactococcus	Lactococcus chungangensis
C24	Bacteria	Proteobacteria	Gammaproteobacteria	Enterobacterales	Enterobacteriaceae	Escherichia	Escherichia coli
C24	Bacteria	Proteobacteria	Gammaproteobacteria	Enterobacterales	Enterobacteriaceae	Escherichia	Escherichia flexneri
C25	Bacteria	Proteobacteria	Gammaproteobacteria	Pseudomonadales	Moraxellaceae	Moraxella	NA
C26	Bacteria	Synergistota	Synergistia	Synergistales	Thermovirgaceae	58-81	NA
C27	Bacteria	Firmicutes	Bacilli	Lactobacillales	Streptococcaceae	Streptococcus	NA
C28	Bacteria	Firmicutes	Bacilli	Lactobacillales	Streptococcaceae	Streptococcus	NA
C29	Bacteria	Proteobacteria	Gammaproteobacteria	Burkholderiales	Burkholderiaceae	NA	NA
C30	Bacteria	Proteobacteria	Gammaproteobacteria	Pseudomonadales	Pseudomonadaceae	Pseudomonas	Pseudomonas
C31	Bacteria	Proteobacteria	Gammaproteobacteria	Pseudomonadales	Moraxellaceae	Moraxella	Moraxella porci
C32	Bacteria	Proteobacteria	Gammaproteobacteria	Pseudomonadales	Moraxellaceae	Moraxella	NA
C33	Bacteria	Bacteroidetes	Bacteroidia	Flavobacteriales	Flavobacteriaceae	Flavobacterium	NA
C34	Bacteria	Proteobacteria	Gammaproteobacteria	Thiotrichales	Thiotrichaceae	NA	NA
C35	Bacteria	Proteobacteria	Gammaproteobacteria	Burkholderiales	Burkholderiaceae	NA	NA
C36	Bacteria	Firmicutes	Negativicutes	NA	NA	NA	NA
C37	Bacteria	Fusobacteriota	Fusobacteriia	Fusobacteriales	Leptotrichiaceae	Sebaldella	Sebaldella termitidis
C38	Bacteria	Proteobacteria	Gammaproteobacteria	Burkholderiales	Neisseriaceae	Neisseria	NA
C39	Bacteria	Proteobacteria	Gammaproteobacteria	Burkholderiales	Burkholderiaceae	NA	NA
C40	Bacteria	Firmicutes	Clostridia	Lachnospirales	Lachnospiraceae	UBA1066	NA
C41	Bacteria	Actinobacteriota	Actinobacteria	Actinomycetales	Microbacteriaceae	NA	NA

## Sheet: MAG Species taxonomy
bin	superkingdom	phylum	class	order	family	genus	species
DTU_2016_113_3_MG_KEN_72_2.vambbin.229	Bacteria	Proteobacteria	Gammaproteobacteria	Burkholderiales	Burkholderiaceae	Brachymonas	NA
DTU_2016_115_1_MG_KHM_21.metabin.53	Bacteria	Firmicutes	Negativicutes	Selenomonadales	NA	NA	NA
DTU_2016_115_1_MG_KHM_21.vambbin.12352	Bacteria	Firmicutes	Negativicutes	Acidaminococcales	Succinispiraceae	NA	NA
DTU_2016_115_1_MG_KHM_21.vambbin.16482	Bacteria	Firmicutes	Negativicutes	Acidaminococcales	Succinispiraceae	NA	NA
DTU_2016_129_1_MG_MLT_63.metabin.49	Bacteria	Proteobacteria	Gammaproteobacteria	Enterobacterales	Pasteurellaceae	Actinobacillus	NA
DTU_2016_130_2_MG_MLT_63_1.metabin.55	Bacteria	Synergistota	Synergistia	Synergistales	Aminobacteriaceae	Syner-01	NA
DTU_2016_130_2_MG_MLT_63_1.vambbin.3369	Bacteria	Proteobacteria	Gammaproteobacteria	Pseudomonadales	Pseudomonadaceae	Pseudomonas	Pseudomonas
DTU_2016_141_2_MG_NLD_43_1.metabin.32	Bacteria	Planctomycetota	UBA8108	UBA8890	UBA8898	UBA8898	NA
DTU_2016_141_2_MG_NLD_43_1.metabin.34	Bacteria	Acidobacteriota	Thermoanaerobaculia	Thermoanaerobaculales	Thermoanaerobaculaceae	NA	NA
DTU_2016_141_2_MG_NLD_43_1.metabin.75	Bacteria	Sumerlaeota	Sumerlaeia	NA	NA	NA	NA
DTU_2016_141_2_MG_NLD_43_1.vambbin.40105	Bacteria	Firmicutes	Bacilli	ML615J-28	CAG-698	NA	NA
DTU_2016_142_3_MG_NLD_43_2.metabin.6	Bacteria	Spirochaetota	Spirochaetia	Treponematales	UBA8932	UBA8932	NA
DTU_2016_142_3_MG_NLD_43_2.vambbin.515	Bacteria	Bacteroidetes	Bacteroidia	Bacteroidales	BBW3	NA	NA
DTU_2016_143_4_MG_NLD_43_3.metabin.20	Bacteria	Desulfobacterota	Syntrophia	Syntrophales	Smithellaceae	UBA8904	NA
DTU_2016_143_4_MG_NLD_43_3.metabin.44	Bacteria	Bacteroidetes	Bacteroidia	Bacteroidales	vadinHA17	SR-FBR-E99	NA
DTU_2016_143_4_MG_NLD_43_3.vambbin.2896	Bacteria	Bacteroidetes	Bacteroidia	Bacteroidales	TTA-H9	TTA-H9	NA
DTU_2016_145_1_MG_NOR_34.vambbin.1435	Bacteria	Firmicutes	Bacilli	Lactobacillales	Streptococcaceae	Lactococcus	Lactococcus piscium
DTU_2016_145_1_MG_NOR_34.vambbin.3146	Bacteria	Proteobacteria	Gammaproteobacteria	Burkholderiales	Burkholderiaceae	Hydrogenophaga	NA
DTU_2016_148_1_MG_NPL_33.vambbin.1157	Bacteria	Firmicutes	Clostridia	Lachnospirales	Lachnospiraceae	NA	NA
DTU_2016_152_1_MG_POL_36.metabin.47	Bacteria	Bacteroidetes	Bacteroidia	Bacteroidales	Lentimicrobiaceae	UBA4417	NA
DTU_2016_155_1_MG_SEN_8.vambbin.3901	Bacteria	Desulfobacterota	Desulfovibrionia	Desulfovibrionales	Desulfovibrionaceae	Desulfovibrio	NA
DTU_2016_156_1_MG_SGP_52.vambbin.18870	Bacteria	Chloroflexota	Anaerolineae	Anaerolineales	Anaerolineaceae	NA	NA
DTU_2016_159_1_MG_SRB_37.vambbin.25680	Bacteria	Bacteroidetes	Bacteroidia	Flavobacteriales	Weeksellaceae	Empedobacter	NA
DTU_2016_164_1_MG_SVN_38.metabin.45	Bacteria	Bacteroidetes	Bacteroidia	Bacteroidales	DTU049	DTU049	DTU049 sp001512885
DTU_2016_164_1_MG_SVN_38.metabin.47	Bacteria	Thermotogota	Thermotogae	Petrotogales	Petrotogaceae	Defluviitoga	Defluviitoga tunisiensis
DTU_2016_164_1_MG_SVN_38.metabin.4	Bacteria	Firmicutes	Clostridia	Acetivibrionales	Ruminiclostridiaceae	DTU059	NA
DTU_2016_164_1_MG_SVN_38.vambbin.15034	Bacteria	Firmicutes	Limnochordia	DTU010	DTU010	DTU010	DTU010 sp002391385
DTU_2016_164_1_MG_SVN_38.vambbin.93095	Archaea	Halobacterota	Methanomicrobia	Methanomicrobiales	Methanocullaceae	Methanoculleus	Methanoculleus thermophilus
DTU_2016_166_3_MG_SVN_38_2.metabin.8	Bacteria	Firmicutes	Syntrophomonadia	Thermacetogeniales	Thermacetogeniaceae	DTU068	NA
DTU_2016_167_1_MG_SWE_41.vambbin.3405	Bacteria	Proteobacteria	Alphaproteobacteria	Rhizobiales	Beijerinckiaceae	NA	NA
DTU_2016_167_1_MG_SWE_41.vambbin.427233	Bacteria	Proteobacteria	Gammaproteobacteria	Burkholderiales	Burkholderiaceae	NA	NA
DTU_2016_167_1_MG_SWE_41.vambbin.877	Bacteria	Proteobacteria	Gammaproteobacteria	Burkholderiales	Burkholderiaceae	Simplicispira	NA
DTU_2016_176_1_MG_TGO_44.metabin.17	Bacteria	Proteobacteria	Gammaproteobacteria	Burkholderiales	Rhodocyclaceae	Thauera	NA
DTU_2016_176_1_MG_TGO_44.metabin.23	Bacteria	Proteobacteria	Alphaproteobacteria	Caulobacterales	Caulobacteraceae	Phenylobacterium	NA
DTU_2016_176_1_MG_TGO_44.metabin.31	Bacteria	Firmicutes	Bacilli	Acholeplasmatales	Acholeplasmataceae	UBA2284	NA
DTU_2016_176_1_MG_TGO_44.metabin.74	Bacteria	Bacteroidetes	Bacteroidia	Bacteroidales	Prolixibacteraceae	UBA1413	NA
DTU_2016_176_1_MG_TGO_44.metabin.80	Bacteria	Firmicutes	UBA994	NA	NA	NA	NA
DTU_2016_176_1_MG_TGO_44.metabin.83	Bacteria	Firmicutes	Clostridia	Saccharofermentanales	UBA5734	NA	NA
DTU_2016_176_1_MG_TGO_44.metabin.87	Bacteria	Firmicutes	Bacilli	Acholeplasmatales	Acholeplasmataceae	UBA2284	NA
DTU_2016_176_1_MG_TGO_44.metabin.93	Bacteria	Campylobacterota	Campylobacteria	Campylobacterales	Sulfurospirillaceae	Sulfurospirillum	NA
DTU_2016_176_1_MG_TGO_44.vambbin.2569	Bacteria	Actinobacteriota	Actinobacteria	Actinomycetales	Microbacteriaceae	Pontimonas	NA
DTU_2016_176_1_MG_TGO_44.vambbin.3220	Bacteria	Proteobacteria	Gammaproteobacteria	Pseudomonadales	Moraxellaceae	Acinetobacter	Acinetobacter tandoii
DTU_2016_176_1_MG_TGO_44.vambbin.3357	Bacteria	Bacteroidetes	Bacteroidia	Bacteroidales	F082	UBA6192	NA
DTU_2016_176_1_MG_TGO_44.vambbin.35153	Bacteria	Proteobacteria	Alphaproteobacteria	Sphingomonadales	Sphingomonadaceae	Sandarakinorhabdus	NA
DTU_2016_176_1_MG_TGO_44.vambbin.36694	Bacteria	Proteobacteria	Gammaproteobacteria	Burkholderiales	Burkholderiaceae	Ottowia	NA
DTU_2016_176_1_MG_TGO_44.vambbin.3940	Bacteria	Proteobacteria	Gammaproteobacteria	Chromatiales	Chromatiaceae	Thiocapsa	NA
DTU_2016_176_1_MG_TGO_44.vambbin.4257	Bacteria	Campylobacterota	Campylobacteria	Campylobacterales	Arcobacteraceae	Aliarcobacter	NA
DTU_2016_176_1_MG_TGO_44.vambbin.51279	Bacteria	Proteobacteria	Gammaproteobacteria	Burkholderiales	Burkholderiaceae	SCGC-AAA027-K21	NA
DTU_2016_176_1_MG_TGO_44.vambbin.5481	Bacteria	Proteobacteria	Alphaproteobacteria	Caulobacterales	Caulobacteraceae	Phenylobacterium	NA
DTU_2016_177_1_MG_TUR_46.metabin.36	Bacteria	Bacteroidetes	Bacteroidia	Flavobacteriales	Flavobacteriaceae	Flavobacterium	NA
DTU_2016_177_1_MG_TUR_46.vambbin.28	Bacteria	Bacteroidetes	Bacteroidia	Flavobacteriales	Weeksellaceae	UBA7623	NA
DTU_2016_180_1_MG_TZA_15.metabin.75	Bacteria	Actinobacteriota	Coriobacteriia	Coriobacteriales	Atopobiaceae	Olsenella	Olsenella
DTU_2016_180_1_MG_TZA_15.vambbin.16148	Bacteria	Proteobacteria	Gammaproteobacteria	Pseudomonadales	Moraxellaceae	Moraxella	NA
DTU_2016_180_1_MG_TZA_15.vambbin.3578	Bacteria	Proteobacteria	Gammaproteobacteria	Burkholderiales	Neisseriaceae	NA	NA
DTU_2016_180_1_MG_TZA_15.vambbin.960	Bacteria	Campylobacterota	Campylobacteria	Campylobacterales	Arcobacteraceae	Aliarcobacter	NA
DTU_2016_181_1_MG_USA_74.metabin.36	Bacteria	Proteobacteria	Gammaproteobacteria	Burkholderiales	Methylophilaceae	Methylotenera	NA
DTU_2016_181_1_MG_USA_74.vambbin.166390	Bacteria	Proteobacteria	Alphaproteobacteria	Sphingomonadales	Sphingomonadaceae	Novosphingobium	NA
DTU_2016_181_1_MG_USA_74.vambbin.18324	Bacteria	Proteobacteria	Alphaproteobacteria	Rhodospirillales	2-12-FULL-67-15	NA	NA
DTU_2016_182_1_MG_USA_74a.metabin.30	Bacteria	Firmicutes	Clostridia	Oscillospirales	Acutalibacteraceae	Ruminococcus	Ruminococcus
DTU_2016_193_1_MG_USA_74c.vambbin.795	Bacteria	Fusobacteriota	Fusobacteriia	Fusobacteriales	Leptotrichiaceae	NA	NA
DTU_2016_198_4_MG_USA_74d_3.metabin.28	Bacteria	Firmicutes	Bacilli	Lactobacillales	Streptococcaceae	Lactococcus	NA
DTU_2016_219_1_MG_USA_74h.metabin.60	Bacteria	Firmicutes	Bacilli	RFN20	CAG-826	NA	NA
DTU_2016_219_1_MG_USA_74h.vambbin.3863	Bacteria	Fusobacteriota	Fusobacteriia	Fusobacteriales	Leptotrichiaceae	Sebaldella	NA
DTU_2016_219_1_MG_USA_74h.vambbin.859	Bacteria	Fusobacteriota	Fusobacteriia	Fusobacteriales	Leptotrichiaceae	NA	NA
DTU_2016_220_1_MG_USA_74i.vambbin.24990	Bacteria	Synergistota	Synergistia	Synergistales	Synergistaceae	NA	NA
DTU_2016_220_1_MG_USA_74i.vambbin.3119	Bacteria	Verrucomicrobiota	Verrucomicrobiae	Chthoniobacterales	NA	NA	NA
DTU_2016_221_1_MG_VNM_48.metabin.52	Bacteria	Proteobacteria	Gammaproteobacteria	Enterobacterales	Shewanellaceae	Shewanella	Shewanella sp002783895
DTU_2016_221_1_MG_VNM_48.vambbin.14952	Bacteria	Proteobacteria	Gammaproteobacteria	Pseudomonadales	Moraxellaceae	Acinetobacter	Acinetobacter bohemicus
DTU_2016_221_1_MG_VNM_48.vambbin.26217	Bacteria	Bacteroidetes	Bacteroidia	Flavobacteriales	Flavobacteriaceae	Flavobacterium	Flavobacterium oncorhynchi
DTU_2016_222_1_MG_XK_60.vambbin.1087	Bacteria	Proteobacteria	Gammaproteobacteria	Pseudomonadales	Moraxellaceae	Acinetobacter	NA
DTU_2016_222_1_MG_XK_60.vambbin.880	Bacteria	Proteobacteria	Gammaproteobacteria	Pseudomonadales	Moraxellaceae	Acinetobacter	NA
DTU_2016_228_3_MG_ZMB_49_2.vambbin.4713	Bacteria	Firmicutes	Bacilli	Lactobacillales	Streptococcaceae	Streptococcus	Streptococcus orisratti
DTU_2016_232_4_MG_ZMB_49b_3.vambbin.332	Bacteria	Proteobacteria	Gammaproteobacteria	Enterobacterales	Succinivibrionaceae	Succinivibrio	Succinivibrio sp000431835
DTU_2016_232_4_MG_ZMB_49b_3.vambbin.9343	Bacteria	Proteobacteria	Gammaproteobacteria	Burkholderiales	Rhodocyclaceae	Propionivibrio	NA
DTU_2016_236_1_MG_Reproduce_12_1.vambbin.20810	Bacteria	Proteobacteria	Gammaproteobacteria	Pseudomonadales	Moraxellaceae	Acinetobacter	NA
DTU_2016_236_1_MG_Reproduce_12_1.vambbin.8664	Bacteria	Proteobacteria	Gammaproteobacteria	Burkholderiales	Neisseriaceae	Bergeriella	NA
DTU_2016_238_1_MG_Reproduce_15_1.vambbin.12036	Bacteria	Firmicutes	Negativicutes	Selenomonadales	Selenomonadaceae	Mitsuokella	Mitsuokella multacida
DTU_2016_242_1_MG_Reproduce_22_1.metabin.77	Bacteria	Actinobacteriota	Actinobacteria	Actinomycetales	Actinomycetaceae	Actinomyces	NA
DTU_2016_242_1_MG_Reproduce_22_1.vambbin.408	Bacteria	Bacteroidetes	Bacteroidia	Bacteroidales	Paludibacteraceae	Paludibacter	NA
DTU_2016_242_1_MG_Reproduce_22_1.vambbin.6696	Bacteria	Proteobacteria	Gammaproteobacteria	Pseudomonadales	Moraxellaceae	Psychrobacter	NA
DTU_2016_242_1_MG_Reproduce_22_1.vambbin.782	Bacteria	Bacteroidetes	Bacteroidia	Flavobacteriales	Flavobacteriaceae	Flavobacterium	NA
DTU_2016_243_2_MG_Reproduce_22_3.vambbin.29	Bacteria	Proteobacteria	Gammaproteobacteria	Enterobacterales	Pasteurellaceae	Chelonobacter	NA
DTU_2016_24_3_MG_BRA_53_2.vambbin.30750	Bacteria	Proteobacteria	Gammaproteobacteria	Burkholderiales	Neisseriaceae	Neisseria	NA
DTU_2016_246_1_MG_Reproduce_53a_1.metabin.31	Bacteria	Firmicutes	Bacilli	Erysipelotrichales	Erysipelotrichaceae	NA	NA
DTU_2016_246_1_MG_Reproduce_53a_1.metabin.38	Bacteria	Verrucomicrobiota	Kiritimatiellae	RFP12	UBA1067	NA	NA
DTU_2016_246_1_MG_Reproduce_53a_1.metabin.63	Bacteria	Desulfobacterota	Desulfovibrionia	Desulfovibrionales	Desulfomicrobiaceae	Desulfomicrobium	NA
DTU_2016_247_2_MG_Reproduce_53a_3.vambbin.6811	Bacteria	Firmicutes	Clostridia	Saccharofermentanales	UBA5734	UBA5734	NA
DTU_2016_250_1_MG_Reproduce_64_1.metabin.66	Bacteria	Acidobacteriota	Thermoanaerobaculia	UBA5066	UBA5066	UBA5066	NA
DTU_2016_250_1_MG_Reproduce_64_1.vambbin.882	Bacteria	Bacteroidetes	Bacteroidia	Chitinophagales	Saprospiraceae	UBA3362	NA
DTU_2016_25_1_MG_BRA_53a.metabin.29	Bacteria	Firmicutes	Clostridia	Christensenellales	CAG-138	UBA7703	NA
DTU_2016_261_1_MG_Indian_sewage_001.metabin.7	Bacteria	Proteobacteria	Gammaproteobacteria	Enterobacterales	Enterobacteriaceae	Enterobacter	Enterobacter cloacae
DTU_2016_26_2_MG_BRA_53a_1.vambbin.1144	Bacteria	Bacteroidetes	Bacteroidia	Bacteroidales	UBA932	Bact-08	Bact-08 sp002842655
DTU_2016_26_2_MG_BRA_53a_1.vambbin.2	Bacteria	Acidobacteriota	Aminicenantia	NA	NA	NA	NA
DTU_2016_273_1_MG_Indian_sewage_004.metabin.27	Bacteria	Desulfobacterota	Syntrophia	Syntrophales	Smithellaceae	UBA8904	NA
DTU_2016_273_1_MG_Indian_sewage_004.metabin.37	Bacteria	Thermotogota	Thermotogae	NA	NA	NA	NA
DTU_2016_278_2_MG_Indian_sewage_005_re_1.vambbin.4525	Bacteria	Firmicutes	Clostridia	Lachnospirales	Lachnospiraceae	UBA1066	NA
DTU_2016_278_2_MG_Indian_sewage_005_re_1.vambbin.817	Archaea	Euryarchaeota	Methanobacteria	Methanobacteriales	Methanobacteriaceae	UBA412	NA
DTU_2016_279_3_MG_Indian_sewage_005_re_2.vambbin.282	Bacteria	Actinobacteriota	Actinobacteria	Propionibacteriales	Propionibacteriaceae	Propionimicrobium	NA
DTU_2016_28_1_MG_BWA_19.metabin.6	Bacteria	Firmicutes	Bacilli	Lactobacillales	Streptococcaceae	Streptococcus	NA
DTU_2016_4_1_MG_ALB_18.vambbin.557	Bacteria	Proteobacteria	Gammaproteobacteria	Pseudomonadales	Moraxellaceae	Psychrobacter	NA
DTU_2016_44_5_MG_CAN_22b_4.metabin.7	Bacteria	Actinobacteriota	Actinobacteria	Propionibacteriales	Propionibacteriaceae	Luteococcus	NA
DTU_2016_44_5_MG_CAN_22b_4.vambbin.10366	Bacteria	Synergistota	Synergistia	Synergistales	Aminobacteriaceae	Aminobacterium	Aminobacterium colombiense
DTU_2016_44_5_MG_CAN_22b_4.vambbin.930	Bacteria	Firmicutes	Clostridia	Oscillospirales	Acutalibacteraceae	UBA1447	UBA1447 sp002329225
DTU_2016_45_1_MG_CAN_22c.metabin.65	Bacteria	Proteobacteria	Alphaproteobacteria	Rhodobacterales	Rhodobacteraceae	Paracoccus	NA
DTU_2016_45_1_MG_CAN_22c.vambbin.1113	Bacteria	Actinobacteriota	Actinobacteria	Actinomycetales	Microbacteriaceae	NA	NA
DTU_2016_48_3_MG_CHE_67_2.metabin.11	Bacteria	Bacteroidetes	Bacteroidia	Chitinophagales	Chitinophagaceae	Niabella	NA
DTU_2016_53_1_MG_CHN_64.metabin.12	Bacteria	Proteobacteria	Alphaproteobacteria	Caulobacterales	Hyphomonadaceae	SWB02	NA
DTU_2016_53_1_MG_CHN_64.metabin.45	Bacteria	Bacteroidetes	Bacteroidia	Chitinophagales	Saprospiraceae	OLB9	NA
DTU_2016_58_1_MG_CZE_23.metabin.29	Bacteria	Fusobacteriota	Fusobacteriia	Fusobacteriales	Leptotrichiaceae	Sebaldella	NA
DTU_2016_58_1_MG_CZE_23.vambbin.10461	Bacteria	Bacteroidetes	Bacteroidia	Flavobacteriales	UJ101	UJ101	NA
DTU_2016_58_1_MG_CZE_23.vambbin.419	Bacteria	Bacteroidetes	Bacteroidia	Flavobacteriales	Weeksellaceae	Chryseobacterium	NA
DTU_2016_66_1_MG_DNK_71_RL.vambbin.6276	Bacteria	Actinobacteriota	Actinobacteria	Streptomycetales	Streptomycetaceae	Streptomyces	Streptomyces griseofuscus
DTU_2016_67_1_MG_DNK_71_RA.metabin.36	Bacteria	Bacteroidetes	Bacteroidia	Flavobacteriales	Flavobacteriaceae	Flavobacterium	NA
DTU_2016_67_1_MG_DNK_71_RA.vambbin.382108	Bacteria	Proteobacteria	Gammaproteobacteria	Xanthomonadales	Xanthomonadaceae	Arenimonas	NA
DTU_2016_67_1_MG_DNK_71_RA.vambbin.84859	Bacteria	Proteobacteria	Gammaproteobacteria	Burkholderiales	Burkholderiaceae	Polaromonas	NA
DTU_2016_69_1_MG_ECU_14.vambbin.622	Bacteria	Bacteroidetes	Bacteroidia	Flavobacteriales	Flavobacteriaceae	Flavobacterium	NA
DTU_2016_74_3_MG_ESP_75_2.metabin.12	Bacteria	Proteobacteria	Gammaproteobacteria	Competibacterales	Competibacteraceae	Contendobacter	NA
DTU_2016_74_3_MG_ESP_75_2.vambbin.13293	Bacteria	Proteobacteria	Gammaproteobacteria	Thiotrichales	Thiotrichaceae	Thiolinea	NA
DTU_2016_74_3_MG_ESP_75_2.vambbin.588	Bacteria	Proteobacteria	Alphaproteobacteria	Reyranellales	Reyranellaceae	Reyranella	NA
DTU_2016_77_6_MG_ESP_75_5.metabin.24	Bacteria	Actinobacteriota	Actinobacteria	Nanopelagicales	UBA10799	NA	NA
DTU_2016_77_6_MG_ESP_75_5.vambbin.480	Bacteria	Firmicutes	Clostridia	Lachnospirales	Lachnospiraceae	CAG-791	NA
DTU_2016_78_1_MG_ETH_24.metabin.43	Bacteria	Desulfobacterota	Desulfovibrionia	Desulfovibrionales	Desulfovibrionaceae	Desulfovibrio	NA
DTU_2016_78_1_MG_ETH_24.vambbin.36860	Bacteria	Proteobacteria	Gammaproteobacteria	Burkholderiales	Burkholderiaceae	Ottowia	NA
DTU_2016_83_2_MG_GEO_59_1.metabin.13	Bacteria	Bacteroidetes	Bacteroidia	Flavobacteriales	Weeksellaceae	Chryseobacterium	Chryseobacterium
DTU_2016_83_2_MG_GEO_59_1.vambbin.844	Bacteria	Proteobacteria	Gammaproteobacteria	Burkholderiales	Burkholderiaceae	Albidiferax	NA
DTU_2016_87_1_MG_GMB_10.vambbin.14495	Bacteria	Proteobacteria	Gammaproteobacteria	Pseudomonadales	Pseudomonadaceae	Pseudomonas	Pseudomonas
DTU_2016_88_1_MG_HRV_68.vambbin.872	Bacteria	Proteobacteria	Gammaproteobacteria	Pseudomonadales	Moraxellaceae	Acinetobacter	NA
DTU_2016_94_1_MG_IND_11.metabin.22	Bacteria	Fusobacteriota	Fusobacteriia	Fusobacteriales	NA	NA	NA
DTU_2017_307_1_MG_ES_BA.metabin.29	Bacteria	Verrucomicrobiota	Kiritimatiellae	NA	NA	NA	NA
DTU_2017_307_1_MG_ES_BA.metabin.60	Bacteria	Bdellovibrionota	Bdellovibrionia	Bdellovibrionales	UBA1609	NA	NA
DTU_2017_307_1_MG_ES_BA.metabin.88	Bacteria	Bdellovibrionota	Bdellovibrionia	Bdellovibrionales	UBA1609	NA	NA
DTU_2017_309_1_MG_GB_FA.metabin.25	Bacteria	Eremiobacterota	UBP9	UBA4705	NA	NA	NA
DTU_2017_309_1_MG_GB_FA.metabin.38	Bacteria	Spirochaetota	Leptospirae	Turneriellales	Turneriellaceae	Turneriella	NA
DTU_2017_309_1_MG_GB_FA.vambbin.1155	Bacteria	Firmicutes	Negativicutes	Selenomonadales	Selenomonadaceae	NA	NA
DTU_2017_309_1_MG_GB_FA.vambbin.1429	Bacteria	Firmicutes	Clostridia	Lachnospirales	Lachnospiraceae	SZUA-378	NA
DTU_2017_309_1_MG_GB_FA.vambbin.17393	Bacteria	Proteobacteria	Gammaproteobacteria	Burkholderiales	Burkholderiaceae	Rhodoferax	NA
DTU_2017_309_1_MG_GB_FA.vambbin.877	Bacteria	Proteobacteria	Gammaproteobacteria	Burkholderiales	Burkholderiaceae	Simplicispira	NA
DTU_2017_309_1_MG_GB_FA.vambbin.933	Bacteria	Bacteroidetes	Bacteroidia	Bacteroidales	Bacteroidaceae	Prevotella	NA
DTU_2017_311_1_MG_TD_ND.vambbin.17353	Bacteria	Proteobacteria	Gammaproteobacteria	Pseudomonadales	Moraxellaceae	Acinetobacter	Acinetobacter indicus
DTU_2017_311_1_MG_TD_ND.vambbin.68777	Bacteria	Firmicutes	Bacilli	Bacillales	Planococcaceae	Kurthia	Kurthia sp002418445
DTU_2017_313_1_MG_CI_BO_a.metabin.4	Bacteria	Actinobacteriota	Actinobacteria	Actinomycetales	Cellulomonadaceae	NA	NA
DTU_2017_314_1_MG_CI_YA.vambbin.104	Bacteria	Campylobacterota	Campylobacteria	Campylobacterales	Arcobacteraceae	Aliarcobacter	NA
DTU_2017_314_1_MG_CI_YA.vambbin.53147	Bacteria	Proteobacteria	Gammaproteobacteria	Burkholderiales	Rhodocyclaceae	NA	NA
DTU_2017_317_1_MG_CM_YA.metabin.51	Bacteria	Firmicutes	Clostridia	Lachnospirales	Lachnospiraceae	Agathobacter	Agathobacter rectale
DTU_2017_317_1_MG_CM_YA.vambbin.4544	Bacteria	Proteobacteria	Gammaproteobacteria	Burkholderiales	Neisseriaceae	Neisseria	NA
DTU_2017_318_1_MG_HK_HK.metabin.27	Bacteria	Proteobacteria	Gammaproteobacteria	UBA5335	UBA5335	UBA5335	UBA5335 sp002410145
DTU_2017_318_1_MG_HK_HK.metabin.86	Bacteria	Proteobacteria	Gammaproteobacteria	Enterobacterales	Pasteurellaceae	Mannheimia	NA
DTU_2017_318_1_MG_HK_HK.vambbin.17494	Bacteria	Proteobacteria	Gammaproteobacteria	Burkholderiales	Burkholderiaceae	Brachymonas	NA
DTU_2017_320_1_MG_BR_BE.metabin.22	Bacteria	Proteobacteria	Gammaproteobacteria	Enterobacterales	Aeromonadaceae	Aeromonas	Aeromonas jandaei
DTU_2017_320_1_MG_BR_BE.vambbin.10138	Bacteria	Firmicutes	Bacilli	Lactobacillales	Vagococcaceae	Vagococcus	Vagococcus sp002140795
DTU_2017_320_1_MG_BR_BE.vambbin.1345	Bacteria	Proteobacteria	Gammaproteobacteria	Pseudomonadales	Pseudomonadaceae	Pseudomonas	Pseudomonas
DTU_2017_320_1_MG_BR_BE.vambbin.2428	Bacteria	Proteobacteria	Gammaproteobacteria	Enterobacterales	Enterobacteriaceae	Citrobacter	Citrobacter freundii
DTU_2017_320_1_MG_BR_BE.vambbin.30773	Bacteria	Desulfobacterota	Desulfovibrionia	Desulfovibrionales	Desulfovibrionaceae	NA	NA
DTU_2017_322_1_MG_GL_SI.metabin.52	Bacteria	Firmicutes	Negativicutes	Selenomonadales	Selenomonadaceae	NA	NA
DTU_2017_322_1_MG_GL_SI.vambbin.10852	Bacteria	Proteobacteria	Gammaproteobacteria	Pseudomonadales	Moraxellaceae	Acinetobacter	Acinetobacter sp002135415
DTU_2017_322_1_MG_GL_SI.vambbin.1644	Bacteria	Proteobacteria	Gammaproteobacteria	Burkholderiales	Burkholderiaceae	B-9	NA
DTU_2017_322_1_MG_GL_SI.vambbin.1656	Bacteria	Proteobacteria	Gammaproteobacteria	Burkholderiales	Burkholderiaceae	Comamonas	NA
DTU_2017_330_1_MG_NL_UT.metabin.9	Bacteria	Firmicutes	Clostridia	Saccharofermentanales	Saccharofermentanaceae	Firm-13	NA
DTU_2017_337_1_MG_LB_SA.metabin.8	Bacteria	Proteobacteria	Gammaproteobacteria	Enterobacterales	Enterobacteriaceae	Klebsiella	Klebsiella pneumoniae
DTU_2017_341_1_MG_GH_AC.metabin.43	Bacteria	Firmicutes	Clostridia	Peptostreptococcales	Anaerovoracaceae	UBA1764	NA
DTU_2017_341_1_MG_GH_AC.metabin.49	Bacteria	Firmicutes	Clostridia	Christensenellales	NA	NA	NA
DTU_2017_341_1_MG_GH_AC.vambbin.15743	Bacteria	Synergistota	Synergistia	Synergistales	Synergistaceae	NA	NA
DTU_2017_341_1_MG_GH_AC.vambbin.295	Bacteria	Bacteroidetes	Bacteroidia	Bacteroidales	vadinHA17	SR-FBR-E99	NA
DTU_2017_341_1_MG_GH_AC.vambbin.96	Bacteria	Hydrogenedentota	Hydrogenedentia	Hydrogenedentiales	UBA2224	UBA2224	NA
DTU_2017_342_1_MG_GH_KU.metabin.10	Bacteria	Firmicutes	Negativicutes	UBA1444	UBA1444	UBA1444	UBA1444 sp002329525
DTU_2017_342_1_MG_GH_KU.metabin.149	Bacteria	Bacteroidetes	Ignavibacteria	Ignavibacteriales	Ignavibacteriaceae	NA	NA
DTU_2017_342_1_MG_GH_KU.metabin.16	Bacteria	Proteobacteria	Gammaproteobacteria	Xanthomonadales	Rhodanobacteraceae	Dokdonella	NA
DTU_2017_342_1_MG_GH_KU.metabin.18	Bacteria	Bacteroidetes	Bacteroidia	Bacteroidales	WCHB1-69	UBA5266	NA
DTU_2017_342_1_MG_GH_KU.metabin.31	Bacteria	Bacteroidetes	Bacteroidia	Chitinophagales	NA	NA	NA
DTU_2017_342_1_MG_GH_KU.vambbin.126	Bacteria	Bacteroidetes	Bacteroidia	Chitinophagales	Chitinophagaceae	JJ008	NA
DTU_2017_342_1_MG_GH_KU.vambbin.1349	Bacteria	Verrucomicrobiota	Kiritimatiellae	NA	NA	NA	NA
DTU_2017_342_1_MG_GH_KU.vambbin.159794	Bacteria	Bacteroidetes	Bacteroidia	Bacteroidales	vadinHA17	SR-FBR-E99	NA
DTU_2017_342_1_MG_GH_KU.vambbin.263	Bacteria	Bacteroidetes	Bacteroidia	Bacteroidales	UBA932	UBA1232	NA
DTU_2017_342_1_MG_GH_KU.vambbin.33846	Bacteria	Bacteroidetes	Bacteroidia	Bacteroidales	Paludibacteraceae	Paludibacter	NA
DTU_2017_342_1_MG_GH_KU.vambbin.43709	Bacteria	Verrucomicrobiota	Kiritimatiellae	UBA8416	NA	NA	NA
DTU_2017_342_1_MG_GH_KU.vambbin.49133	Bacteria	Caldisericota	Caldisericia	UBA4822	UBA4822	UBA4822	NA
DTU_2017_342_1_MG_GH_KU.vambbin.97480	Bacteria	Spirochaetota	Spirochaetia	Treponematales	UBA8932	NA	NA
DTU_2017_348_1_MG_SI_LJ.vambbin.309	Archaea	Euryarchaeota	Methanobacteria	Methanobacteriales	UBA12515	UBA12515	UBA12515 sp001507955
DTU_2017_349_1_MG_SE_UP.metabin.94	Bacteria	Verrucomicrobiota	Verrucomicrobiae	Chthoniobacterales	Xiphinematobacteraceae	NA	NA
DTU_2017_349_1_MG_SE_UP.metabin.95	Bacteria	Proteobacteria	Alphaproteobacteria	Rhizobiales	Xanthobacteraceae	Xanthobacter	NA
DTU_2017_349_1_MG_SE_UP.vambbin.196886	Bacteria	Proteobacteria	Gammaproteobacteria	Burkholderiales	Burkholderiaceae	Castellaniella	NA
DTU_2017_351_1_MG_IT_CA.metabin.21	Bacteria	Bacteroidetes	Bacteroidia	Chitinophagales	Chitinophagaceae	Ferruginibacter	NA
DTU_2017_352_1_MG_IT_NO.vambbin.6525	Bacteria	Proteobacteria	Gammaproteobacteria	Enterobacterales	Enterobacteriaceae	Yersinia	Yersinia massiliensis
DTU_2017_353_1_MG_IE_GA.vambbin.1007	Bacteria	Proteobacteria	Gammaproteobacteria	Pseudomonadales	Moraxellaceae	Alkanindiges	NA
DTU_2017_353_1_MG_IE_GA.vambbin.269	Bacteria	Bacteroidetes	Bacteroidia	Flavobacteriales	Weeksellaceae	Cloacibacterium	NA
DTU_2017_353_1_MG_IE_GA.vambbin.327	Bacteria	Proteobacteria	Gammaproteobacteria	Burkholderiales	Rhodocyclaceae	Dechloromonas	NA
DTU_2017_354_1_MG_AT_VI.metabin.34	Bacteria	Firmicutes	Clostridia	Christensenellales	CAG-74	NA	NA
DTU_2017_354_1_MG_AT_VI.metabin.40	Bacteria	Firmicutes	Clostridia	Oscillospirales	Ruminococcaceae	Ruminiclostridium	Ruminiclostridium
DTU_2017_354_1_MG_AT_VI.metabin.51	Bacteria	Firmicutes	Clostridia	Oscillospirales	Ruminococcaceae	Ruminococcus	Ruminococcus
DTU_2017_354_1_MG_AT_VI.metabin.67	Bacteria	Firmicutes	Clostridia	Lachnospirales	Lachnospiraceae	Blautia	Blautia
DTU_2017_354_1_MG_AT_VI.vambbin.7430	Bacteria	Firmicutes	Clostridia	Oscillospirales	Acutalibacteraceae	CAG-177	CAG-177 sp003514385
DTU_2017_354_1_MG_AT_VI.vambbin.901	Bacteria	Firmicutes	Clostridia	Lachnospirales	Lachnospiraceae	Coprococcus	Coprococcus sp900066115
DTU_2017_355_1_MG_SN_DA.metabin.27	Bacteria	Verrucomicrobiota	Kiritimatiellae	LD1-PB3	Lenti-01	Lenti-01	NA
DTU_2017_355_1_MG_SN_DA.vambbin.12273	Bacteria	Verrucomicrobiota	Kiritimatiellae	LD1-PB3	Lenti-01	Lenti-01	NA
DTU_2017_357_1_MG_ET_AD.vambbin.2248	Bacteria	Firmicutes	Bacilli	Lactobacillales	Streptococcaceae	Streptococcus	NA
DTU_2017_358_1_MG_RS_BE.vambbin.610	Bacteria	Proteobacteria	Gammaproteobacteria	Pseudomonadales	Moraxellaceae	Moraxella	NA
DTU_2017_364_1_MG_TZ_MW.vambbin.63206	Bacteria	Desulfobacterota	Desulfobulbia	Desulfobulbales	Desulfobulbaceae	NA	NA
DTU_2017_365_1_MG_TZ_MO.metabin.7	Bacteria	Proteobacteria	Gammaproteobacteria	Burkholderiales	Burkholderiaceae	Brachymonas	NA
DTU_2017_366_1_MG_PY_SL.vambbin.14885	Bacteria	Proteobacteria	Gammaproteobacteria	Burkholderiales	Burkholderiaceae	Rhodoferax	NA
DTU_2017_367_1_MG_PY_AS.metabin.18	Bacteria	Proteobacteria	Alphaproteobacteria	Rhodobacterales	Rhodobacteraceae	UBA1943	NA
DTU_2017_367_1_MG_PY_AS.vambbin.41113	Bacteria	Bacteroidetes	Bacteroidia	Flavobacteriales	Crocinitomicaceae	UBA2040	NA
DTU_2017_369_1_MG_BB_WO.vambbin.265	Bacteria	Desulfobacterota	Desulfobulbia	Desulfobulbales	Desulfobulbaceae	ORNL	NA
DTU_2017_369_1_MG_BB_WO.vambbin.2969	Bacteria	Proteobacteria	Gammaproteobacteria	Burkholderiales	Rhodocyclaceae	Propionivibrio	NA
DTU_2017_369_1_MG_BB_WO.vambbin.3972	Bacteria	Proteobacteria	Gammaproteobacteria	Burkholderiales	Burkholderiaceae	Brachymonas	Brachymonas chironomi
DTU_2017_369_1_MG_BB_WO.vambbin.5735	Bacteria	Proteobacteria	Gammaproteobacteria	Thiotrichales	Thiotrichaceae	NA	NA
DTU_2017_370_1_MG_US_WA.metabin.47	Bacteria	Proteobacteria	Alphaproteobacteria	Rhizobiales	Pleomorphomonadaceae	Prosthecomicrobium	Prosthecomicrobium sp002298965
DTU_2017_370_1_MG_US_WA.vambbin.2674	Bacteria	Proteobacteria	Gammaproteobacteria	Pseudomonadales	Moraxellaceae	Psychrobacter	Psychrobacter cryohalolentis
DTU_2017_371_1_MG_US_AU.metabin.8	Bacteria	Proteobacteria	Alphaproteobacteria	Sphingomonadales	Sphingomonadaceae	NA	NA
DTU_2017_372_1_MG_US_HO_a.metabin.18	Bacteria	Actinobacteriota	Acidimicrobiia	IMCC26256	NA	NA	NA
DTU_2017_372_1_MG_US_HO_a.metabin.26	Bacteria	Acidobacteriota	Blastocatellia	Pyrinomonadales	Pyrinomonadaceae	OLB17	NA
DTU_2017_372_1_MG_US_HO_a.metabin.72	Bacteria	Acidobacteriota	Vicinamibacteria	Fen-336	NA	NA	NA
DTU_2017_372_1_MG_US_HO_a.metabin.79	Bacteria	Proteobacteria	Alphaproteobacteria	Caulobacterales	Parvularculaceae	CV81	NA
DTU_2017_372_1_MG_US_HO_a.vambbin.13278	Bacteria	Proteobacteria	Gammaproteobacteria	Xanthomonadales	Xanthomonadaceae	Lysobacter	NA
DTU_2017_372_1_MG_US_HO_a.vambbin.1521	Bacteria	Proteobacteria	Gammaproteobacteria	Steroidobacterales	Steroidobacteraceae	NA	NA
DTU_2017_372_1_MG_US_HO_a.vambbin.2753	Bacteria	Proteobacteria	Gammaproteobacteria	Competibacterales	Competibacteraceae	Contendobacter	NA
DTU_2017_372_1_MG_US_HO_a.vambbin.8858	Bacteria	Bacteroidetes	Bacteroidia	Cytophagales	Spirosomaceae	NA	NA
DTU_2017_373_1_MG_BD_DH.metabin.28	Bacteria	Firmicutes	Bacilli	Erysipelotrichales	Erysipelotrichaceae	UBA6182	NA
DTU_2017_373_1_MG_BD_DH.metabin.29	Bacteria	Bacteroidetes	Bacteroidia	Bacteroidales	Prolixibacteraceae	UBA1413	NA
DTU_2017_373_1_MG_BD_DH.metabin.30	Bacteria	Bacteroidetes	Bacteroidia	Bacteroidales	Paludibacteraceae	Paludibacter	NA
DTU_2017_373_1_MG_BD_DH.metabin.72	Bacteria	Desulfobacterota	Desulfovibrionia	Desulfovibrionales	Desulfomicrobiaceae	Desulfomicrobium	NA
DTU_2017_373_1_MG_BD_DH.metabin.76	Bacteria	Bacteroidetes	Bacteroidia	Bacteroidales	Paludibacteraceae	NA	NA
DTU_2017_373_1_MG_BD_DH.metabin.80	Bacteria	Firmicutes	TC1	NA	NA	NA	NA
DTU_2017_373_1_MG_BD_DH.vambbin.44882	Bacteria	Proteobacteria	Gammaproteobacteria	Burkholderiales	Rhodocyclaceae	Uliginosibacterium	NA
DTU_2017_374_2_MG_US_HO_b.metabin.22	Bacteria	Proteobacteria	Gammaproteobacteria	Xanthomonadales	Rhodanobacteraceae	Dokdonella	NA
DTU_2017_374_2_MG_US_HO_b.metabin.32	Bacteria	Proteobacteria	Alphaproteobacteria	Micavibrionales	Micavibrionaceae	NA	NA
DTU_2017_374_2_MG_US_HO_b.metabin.47	Bacteria	Actinobacteriota	Actinobacteria	Nanopelagicales	NA	NA	NA
DTU_2017_374_2_MG_US_HO_b.metabin.48	Bacteria	Proteobacteria	Gammaproteobacteria	Pseudomonadales	UBA7239	UBA7239	NA
DTU_2017_374_2_MG_US_HO_b.metabin.52	Bacteria	Myxococcota	Polyangia	Haliangiales	Haliangiaceae	NA	NA
DTU_2017_374_2_MG_US_HO_b.vambbin.1081	Bacteria	Bacteroidetes	Bacteroidia	AKYH767-A	OLB10	OLB10	OLB10 sp002455375
DTU_2017_374_2_MG_US_HO_b.vambbin.10850	Bacteria	Proteobacteria	Gammaproteobacteria	Burkholderiales	Burkholderiaceae	Rubrivivax	NA
DTU_2017_374_2_MG_US_HO_b.vambbin.23200	Bacteria	Proteobacteria	Alphaproteobacteria	Sphingomonadales	Sphingomonadaceae	Ga0077559	NA
DTU_2017_374_2_MG_US_HO_b.vambbin.77	Bacteria	Proteobacteria	Alphaproteobacteria	Sphingomonadales	Sphingomonadaceae	UBA1936	NA
DTU_2017_377_1_MG_LV_RI.vambbin.266444	Bacteria	Bacteroidetes	Bacteroidia	Bacteroidales	Bacteroidaceae	Prevotella	NA
DTU_2017_378_1_MG_LV_LI.metabin.42	Bacteria	Proteobacteria	Gammaproteobacteria	Burkholderiales	Rhodocyclaceae	Dechloromonas	Dechloromonas sp002396525
DTU_2017_380_1_MG_MU_PL.metabin.49	Bacteria	Actinobacteriota	Actinobacteria	Actinomycetales	Microbacteriaceae	Microbacterium	NA
DTU_2017_380_1_MG_MU_PL.vambbin.20916	Bacteria	Proteobacteria	Gammaproteobacteria	Burkholderiales	Burkholderiaceae	B-9	NA
DTU_2017_380_1_MG_MU_PL.vambbin.37010	Bacteria	Proteobacteria	Gammaproteobacteria	Pseudomonadales	Moraxellaceae	Acinetobacter	Acinetobacter bereziniae
DTU_2017_381_1_MG_IL_BE.metabin.55	Bacteria	Fusobacteriota	Fusobacteriia	Fusobacteriales	Leptotrichiaceae	Leptotrichia	NA
DTU_2017_381_1_MG_IL_BE.vambbin.4223	Bacteria	Proteobacteria	Gammaproteobacteria	Pseudomonadales	Moraxellaceae	Psychrobacter	Psychrobacter sp000511065
DTU_2017_381_1_MG_IL_BE.vambbin.5020	Bacteria	Proteobacteria	Gammaproteobacteria	Burkholderiales	Burkholderiaceae	Hydrogenophaga	Hydrogenophaga pseudoflava
DTU_2017_381_1_MG_IL_BE.vambbin.5828	Bacteria	Proteobacteria	Gammaproteobacteria	Burkholderiales	Burkholderiaceae	Tepidimonas	Tepidimonas fonticaldi
DTU_2017_383_1_MG_AU_MA.metabin.100	Bacteria	Verrucomicrobiota	Verrucomicrobiae	Opitutales	Opitutaceae	NA	NA
DTU_2017_383_1_MG_AU_MA.metabin.103	Bacteria	Verrucomicrobiota	Kiritimatiellae	UBA8416	NA	NA	NA
DTU_2017_383_1_MG_AU_MA.metabin.112	Bacteria	Firmicutes	Negativicutes	UBA1444	UBA1444	NA	NA
DTU_2017_383_1_MG_AU_MA.metabin.42	Bacteria	Actinobacteriota	Actinobacteria	Nanopelagicales	S36-B12	NA	NA
DTU_2017_383_1_MG_AU_MA.metabin.49	Bacteria	Verrucomicrobiota	Kiritimatiellae	UBA8416	NA	NA	NA
DTU_2017_383_1_MG_AU_MA.metabin.58	Bacteria	Desulfobacterota	Desulfomonilia	Desulfomonilales	Desulfomonilaceae	NA	NA
DTU_2017_383_1_MG_AU_MA.metabin.64	Bacteria	Proteobacteria	Gammaproteobacteria	Chromatiales	Chromatiaceae	Thiodictyon	NA
DTU_2017_383_1_MG_AU_MA.metabin.95	Bacteria	Proteobacteria	Alphaproteobacteria	Rhizobiales	Rhizobiaceae	NA	NA
DTU_2017_383_1_MG_AU_MA.vambbin.184386	Bacteria	Verrucomicrobiota	Verrucomicrobiae	Chthoniobacterales	NA	NA	NA
DTU_2017_383_1_MG_AU_MA.vambbin.214780	Bacteria	Proteobacteria	Alphaproteobacteria	Rhizobiales	Beijerinckiaceae	Alsobacter	NA
DTU_2017_383_1_MG_AU_MA.vambbin.47793	Bacteria	Actinobacteriota	Actinobacteria	Actinomycetales	Microbacteriaceae	NA	NA
DTU_2017_384_1_MG_AU_DD.metabin.77	Bacteria	Proteobacteria	Gammaproteobacteria	Burkholderiales	Neisseriaceae	Stenoxybacter	NA
DTU_2017_384_1_MG_AU_DD.vambbin.19336	Bacteria	Proteobacteria	Gammaproteobacteria	Thiotrichales	Thiotrichaceae	NA	NA
DTU_2017_386_1_MG_MT_MN.metabin.60	Bacteria	Firmicutes	Negativicutes	Acidaminococcales	Acidaminococcaceae	NA	NA
DTU_2017_387_1_MG_MT_GO.metabin.28	Bacteria	Firmicutes	Clostridia	Christensenellales	CAG-74	DTU024	NA
DTU_2017_387_1_MG_MT_GO.metabin.33	Bacteria	Bacteroidetes	Bacteroidia	Bacteroidales	vadinHA17	SR-FBR-E99	NA
DTU_2017_387_1_MG_MT_GO.metabin.34	Bacteria	Desulfobacterota	Syntrophia	Syntrophales	Smithellaceae	UBA8904	NA
DTU_2017_387_1_MG_MT_GO.metabin.59	Bacteria	Bacteroidetes	Bacteroidia	Bacteroidales	vadinHA17	LD21	NA
DTU_2017_389_1_MG_SA_KA.vambbin.11904	Bacteria	Firmicutes	Bacilli	Lactobacillales	Lactobacillaceae	Lactobacillus	Lactobacillus amylovorus
DTU_2017_390_1_MG_LC_CA.vambbin.5141	Bacteria	Proteobacteria	Gammaproteobacteria	Thiotrichales	Thiotrichaceae	Thiothrix	NA
DTU_2017_391_1_MG_LC_GR.metabin.73	Bacteria	Proteobacteria	Gammaproteobacteria	Enterobacterales	Pasteurellaceae	Glaesserella	NA
DTU_2017_393_1_MG_TG_LO.metabin.68	Bacteria	Proteobacteria	Gammaproteobacteria	Burkholderiales	Rhodocyclaceae	Thauera	NA
DTU_2017_393_1_MG_TG_LO.vambbin.2629	Bacteria	Synergistota	Synergistia	Synergistales	Aminobacteriaceae	Syner-01	NA
DTU_2017_393_1_MG_TG_LO.vambbin.889	Bacteria	Proteobacteria	Gammaproteobacteria	Burkholderiales	Burkholderiaceae	Brachymonas	NA
DTU_2017_394_1_MG_NG_LA.metabin.8	Bacteria	Acidobacteriota	Aminicenantia	Aminicenantales	UBA4085	NA	NA
DTU_2017_394_1_MG_NG_LA.vambbin.103862	Bacteria	Verrucomicrobiota	Verrucomicrobiae	Chthoniobacterales	Terrimicrobiaceae	Terrimicrobium	NA
DTU_2017_395_2_MG_CI_BO_b.vambbin.1653	Bacteria	Proteobacteria	Gammaproteobacteria	Pseudomonadales	Moraxellaceae	Acinetobacter	Acinetobacter junii
DTU_2017_396_1_MG_BW_GA.vambbin.1531	Bacteria	Firmicutes	Clostridia	Christensenellales	CAG-138	UBA7703	NA
DTU_2017_396_1_MG_BW_GA.vambbin.1539	Archaea	Halobacterota	Methanosarcinia	Methanotrichales	Methanotrichaceae	Methanothrix	NA
DTU_2017_396_1_MG_BW_GA.vambbin.3039	Archaea	Halobacterota	Methanosarcinia	Methanotrichales	Methanotrichaceae	Methanothrix	NA
DTU_2017_397_1_MG_TW_TA.vambbin.6503	Bacteria	Proteobacteria	Gammaproteobacteria	Pseudomonadales	Moraxellaceae	Acinetobacter	NA
DTU_2017_399_1_MG_US_WO.metabin.72	Bacteria	Proteobacteria	Gammaproteobacteria	Xanthomonadales	Xanthomonadaceae	Thermomonas	NA
DTU_2017_399_1_MG_US_WO.vambbin.2096	Bacteria	Proteobacteria	Gammaproteobacteria	Xanthomonadales	Xanthomonadaceae	Thermomonas	NA
DTU_2017_399_1_MG_US_WO.vambbin.260	Bacteria	Proteobacteria	Gammaproteobacteria	Burkholderiales	Burkholderiaceae	Variovorax	NA
DTU_2017_400_1_MG_EC_QU.metabin.44	Bacteria	Actinobacteriota	Actinobacteria	Actinomycetales	Microbacteriaceae	Microbacterium	Microbacterium sp001425645
DTU_2017_400_1_MG_EC_QU.vambbin.10879	Bacteria	Bacteroidetes	Bacteroidia	Sphingobacteriales	Sphingobacteriaceae	Sphingobacterium	NA
DTU_2017_402_1_MG_EC_GY.metabin.39	Bacteria	Bacteroidetes	Bacteroidia	Flavobacteriales	Flavobacteriaceae	Flavobacterium	NA
DTU_2017_403_1_MG_EC_CU.vambbin.1138	Bacteria	Proteobacteria	Gammaproteobacteria	Pseudomonadales	Pseudomonadaceae	Pseudomonas	NA
DTU_2017_403_1_MG_EC_CU.vambbin.641	Bacteria	Proteobacteria	Gammaproteobacteria	Pseudomonadales	Pseudomonadaceae	Pseudomonas	Pseudomonas
DTU_2017_405_1_MG_MW_KA.metabin.24	Bacteria	Proteobacteria	Gammaproteobacteria	Methylococcales	Methylococcaceae	UBA6136	NA
DTU_2017_405_1_MG_MW_KA.metabin.34	Bacteria	Proteobacteria	Alphaproteobacteria	Sphingomonadales	Sphingomonadaceae	Novosphingobium	NA
DTU_2017_405_1_MG_MW_KA.metabin.36	Bacteria	Proteobacteria	Gammaproteobacteria	Steroidobacterales	Steroidobacteraceae	NA	NA
DTU_2017_405_1_MG_MW_KA.metabin.40	Bacteria	Proteobacteria	Gammaproteobacteria	Pseudomonadales	Moraxellaceae	Psychrobacter	NA
DTU_2017_405_1_MG_MW_KA.metabin.53	Bacteria	Actinobacteriota	Actinobacteria	Mycobacteriales	Mycobacteriaceae	Mycolicibacterium	NA
DTU_2017_405_1_MG_MW_KA.metabin.62	Bacteria	Bacteroidetes	Bacteroidia	Flavobacteriales	Flavobacteriaceae	Flavobacterium	NA
DTU_2017_405_1_MG_MW_KA.metabin.69	Bacteria	Proteobacteria	Gammaproteobacteria	Burkholderiales	Burkholderiaceae	Limnohabitans	NA
DTU_2017_405_1_MG_MW_KA.metabin.70	Bacteria	Bacteroidetes	Bacteroidia	Cytophagales	Spirosomaceae	Leadbetterella	NA
DTU_2017_405_1_MG_MW_KA.vambbin.51110	Bacteria	Proteobacteria	Gammaproteobacteria	Burkholderiales	Burkholderiaceae	SCGC-AAA027-K21	NA
DTU_2017_406_1_MG_MW_MZ.metabin.40	Bacteria	Proteobacteria	Alphaproteobacteria	Rhodobacterales	Rhodobacteraceae	Paracoccus	NA
DTU_2017_408_1_MG_MW_BL.vambbin.14604	Bacteria	Proteobacteria	Gammaproteobacteria	Burkholderiales	Neisseriaceae	Bergeriella	NA
DTU_2017_410_1_MG_PL_PL.vambbin.12306	Bacteria	Proteobacteria	Gammaproteobacteria	Xanthomonadales	Xanthomonadaceae	Thermomonas	NA
DTU_2017_410_1_MG_PL_PL.vambbin.707	Bacteria	Bacteroidetes	Bacteroidia	Chitinophagales	Saprospiraceae	NA	NA
DTU_2017_411_1_MG_NG_IL_a.metabin.55	Bacteria	Verrucomicrobiota	Kiritimatiellae	LD1-PB3	GWF2-57-35	NA	NA
DTU_2017_411_1_MG_NG_IL_a.metabin.67	Bacteria	Verrucomicrobiota	Kiritimatiellae	NA	NA	NA	NA
DTU_2017_411_1_MG_NG_IL_a.metabin.68	Bacteria	Armatimonadota	UBA5829	UBA5829	UBA5829	NA	NA
DTU_2017_412_2_MG_NG_IL_b.metabin.103	Bacteria	Elusimicrobiota	Endomicrobia	Endomicrobiales	Endomicrobiaceae	NA	NA
DTU_2017_412_2_MG_NG_IL_b.metabin.113	Bacteria	Bacteroidetes	Kapabacteria	Kapabacteriales	GCA-002839825	NA	NA
DTU_2017_412_2_MG_NG_IL_b.metabin.115	Bacteria	Firmicutes	Clostridia	Tissierellales	Sedimentibacteraceae	NA	NA
DTU_2017_412_2_MG_NG_IL_b.metabin.122	Bacteria	Spirochaetota	Spirochaetia	Treponematales	UBA8932	NA	NA
DTU_2017_412_2_MG_NG_IL_b.metabin.131	Bacteria	Firmicutes	Clostridia	Acetivibrionales	Acetivibrionaceae	NA	NA
DTU_2017_412_2_MG_NG_IL_b.metabin.135	Bacteria	Bacteroidetes	Bacteroidia	Bacteroidales	TTA-H9	NA	NA
DTU_2017_412_2_MG_NG_IL_b.metabin.136	Bacteria	Firmicutes	Clostridia	Oscillospirales	Ruminococcaceae	NA	NA
DTU_2017_412_2_MG_NG_IL_b.metabin.152	Bacteria	Bacteroidetes	Bacteroidia	Bacteroidales	FEN-979	FEN-979	NA
DTU_2017_412_2_MG_NG_IL_b.metabin.155	Bacteria	Firmicutes	Clostridia	Christensenellales	CAG-74	NA	NA
DTU_2017_412_2_MG_NG_IL_b.metabin.27	Bacteria	Firmicutes	Clostridia	Oscillospirales	Ruminococcaceae	NA	NA
DTU_2017_412_2_MG_NG_IL_b.metabin.38	Bacteria	Bacteroidetes	Bacteroidia	Bacteroidales	Paludibacteraceae	Paludibacter	NA
DTU_2017_412_2_MG_NG_IL_b.metabin.48	Bacteria	Bacteroidetes	Bacteroidia	Bacteroidales	Prolixibacteraceae	NA	NA
DTU_2017_412_2_MG_NG_IL_b.metabin.55	Bacteria	Bacteroidetes	Bacteroidia	Bacteroidales	vadinHA17	LD21	NA
DTU_2017_412_2_MG_NG_IL_b.metabin.63	Bacteria	Verrucomicrobiota	Kiritimatiellae	LD1-PB3	Lenti-01	Lenti-01	NA
DTU_2017_412_2_MG_NG_IL_b.metabin.72	Bacteria	Bacteroidetes	Bacteroidia	Bacteroidales	TTA-H9	NA	NA
DTU_2017_412_2_MG_NG_IL_b.metabin.75	Bacteria	Firmicutes	Clostridia	Saccharofermentanales	UBA5734	NA	NA
DTU_2017_412_2_MG_NG_IL_b.metabin.80	Bacteria	Firmicutes	Clostridia	Christensenellales	CAG-74	UBA1038	NA
DTU_2017_412_2_MG_NG_IL_b.metabin.94	Bacteria	Firmicutes	Clostridia	Saccharofermentanales	UBA5734	NA	NA
DTU_2017_412_2_MG_NG_IL_b.metabin.95	Bacteria	Bacteroidetes	Bacteroidia	Bacteroidales	WCHB1-69	UBA5429	NA
DTU_2017_412_2_MG_NG_IL_b.metabin.99	Bacteria	Firmicutes	Negativicutes	Sporomusales	Thermosinaceae	NA	NA
DTU_2017_412_2_MG_NG_IL_b.vambbin.14145	Bacteria	Bacteroidetes	Bacteroidia	Bacteroidales	Prolixibacteraceae	UBA1413	NA
DTU_2017_412_2_MG_NG_IL_b.vambbin.274	Bacteria	Spirochaetota	Spirochaetia	Treponematales	Treponemataceae	Treponema	Treponema
DTU_2017_412_2_MG_NG_IL_b.vambbin.32850	Bacteria	Bacteroidetes	Bacteroidia	Bacteroidales	UBA932	RC9	NA
DTU_2017_412_2_MG_NG_IL_b.vambbin.4039	Bacteria	Actinobacteriota	Actinobacteria	Propionibacteriales	Propionibacteriaceae	Propionicimonas	NA
DTU_2017_412_2_MG_NG_IL_b.vambbin.41330	Bacteria	Verrucomicrobiota	Kiritimatiellae	RFP12	UBA1067	NA	NA
DTU_2017_412_2_MG_NG_IL_b.vambbin.48964	Bacteria	Bacteroidetes	Bacteroidia	Bacteroidales	UBA932	DMER64	DMER64 sp002409325
DTU_2017_412_2_MG_NG_IL_b.vambbin.496	Bacteria	Bacteroidetes	Bacteroidia	Bacteroidales	Paludibacteraceae	NA	NA
DTU_2017_412_2_MG_NG_IL_b.vambbin.49841	Bacteria	Bacteroidetes	Bacteroidia	Bacteroidales	FEN-979	FEN-979	NA
DTU_2017_412_2_MG_NG_IL_b.vambbin.624744	Bacteria	Actinobacteriota	Actinobacteria	Nanopelagicales	S36-B12	GCA-2737125	NA
DTU_2017_414_4_MG_NG_IL_d.metabin.14	Bacteria	Bacteroidetes	Bacteroidia	Bacteroidales	UBA932	NA	NA
DTU_2017_414_4_MG_NG_IL_d.metabin.157	Bacteria	Bacteroidetes	Bacteroidia	Bacteroidales	Paludibacteraceae	RUG163	NA
DTU_2017_414_4_MG_NG_IL_d.metabin.20	Bacteria	Bacteroidetes	Bacteroidia	Bacteroidales	UBA932	RC9	NA
DTU_2017_414_4_MG_NG_IL_d.metabin.2	Bacteria	Verrucomicrobiota	Kiritimatiellae	RFP12	UBA1067	NA	NA
DTU_2017_414_4_MG_NG_IL_d.metabin.37	Bacteria	Verrucomicrobiota	Kiritimatiellae	NA	NA	NA	NA
DTU_2017_414_4_MG_NG_IL_d.metabin.59	Bacteria	Bacteroidetes	Bacteroidia	Bacteroidales	BM520	NA	NA
DTU_2017_414_4_MG_NG_IL_d.metabin.81	Bacteria	Bdellovibrionota	UBA2361	SZUA-149	SZUA-149	NA	NA
DTU_2017_414_4_MG_NG_IL_d.metabin.8	Bacteria	Cloacimonadota	Cloacimonadia	Cloacimonadales	Cloacimonadaceae	Cloacimonetes-2	NA
DTU_2017_414_4_MG_NG_IL_d.vambbin.11201	Bacteria	Firmicutes	Clostridia	Peptostreptococcales	Anaerovoracaceae	UBA1191	NA
DTU_2017_414_4_MG_NG_IL_d.vambbin.146351	Bacteria	Verrucomicrobiota	Lentisphaeria	UBA1407	YB12-FULL-65-16	NA	NA
DTU_2017_414_4_MG_NG_IL_d.vambbin.159068	Bacteria	Firmicutes	Clostridia	Oscillospirales	NA	NA	NA
DTU_2017_414_4_MG_NG_IL_d.vambbin.2499	Bacteria	Bacteroidetes	Bacteroidia	Bacteroidales	Paludibacteraceae	Paludibacter	NA
DTU_2017_414_4_MG_NG_IL_d.vambbin.298631	Bacteria	Verrucomicrobiota	Kiritimatiellae	NA	NA	NA	NA
DTU_2017_414_4_MG_NG_IL_d.vambbin.75178	Bacteria	Verrucomicrobiota	Kiritimatiellae	NA	NA	NA	NA
DTU_2017_415_1_MG_NG_ZA_a.metabin.25	Bacteria	Actinobacteriota	Actinobacteria	Mycobacteriales	Mycobacteriaceae	Mycolicibacterium	NA
DTU_2017_415_1_MG_NG_ZA_a.metabin.53	Bacteria	Actinobacteriota	Actinobacteria	Mycobacteriales	Mycobacteriaceae	Mycolicibacterium	NA
DTU_2017_415_1_MG_NG_ZA_a.vambbin.14	Bacteria	Firmicutes	Bacilli	Lactobacillales	Carnobacteriaceae	Carnobacterium	Carnobacterium
DTU_2017_415_1_MG_NG_ZA_a.vambbin.20587	Bacteria	Proteobacteria	Gammaproteobacteria	Pseudomonadales	Pseudomonadaceae	Pseudomonas	Pseudomonas
DTU_2017_415_1_MG_NG_ZA_a.vambbin.20848	Bacteria	Proteobacteria	Gammaproteobacteria	Burkholderiales	Burkholderiaceae	UBA954	NA
DTU_2017_415_1_MG_NG_ZA_a.vambbin.25671	Bacteria	Proteobacteria	Gammaproteobacteria	Burkholderiales	Burkholderiaceae	SCGC-AAA027-K21	NA
DTU_2017_416_2_MG_NG_ZA_b.metabin.29	Bacteria	Proteobacteria	Alphaproteobacteria	Sphingomonadales	Sphingomonadaceae	Sandarakinorhabdus	NA
DTU_2017_416_2_MG_NG_ZA_b.metabin.30	Bacteria	Bacteroidetes	Ignavibacteria	SJA-28	B-1AR	NA	NA
DTU_2017_416_2_MG_NG_ZA_b.metabin.31	Bacteria	Bacteroidetes	Bacteroidia	Bacteroidales	F082	UBA6192	NA
DTU_2017_416_2_MG_NG_ZA_b.metabin.36	Bacteria	Proteobacteria	Gammaproteobacteria	Enterobacterales	Enterobacteriaceae	Escherichia	Escherichia coli
DTU_2017_416_2_MG_NG_ZA_b.metabin.54	Bacteria	Proteobacteria	Gammaproteobacteria	Burkholderiales	Burkholderiaceae	Janthinobacterium	Janthinobacterium svalbardensis
DTU_2017_416_2_MG_NG_ZA_b.metabin.55	Bacteria	Proteobacteria	Gammaproteobacteria	Pseudomonadales	Pseudomonadaceae	Pseudomonas	Pseudomonas
DTU_2017_416_2_MG_NG_ZA_b.vambbin.17361	Bacteria	Proteobacteria	Gammaproteobacteria	Pseudomonadales	Moraxellaceae	Psychrobacter	Psychrobacter immobilis
DTU_2017_417_3_MG_NG_ZA_c.metabin.19	Bacteria	Proteobacteria	Alphaproteobacteria	Rhizobiales	Hyphomicrobiaceae	Hyphomicrobium	NA
DTU_2017_417_3_MG_NG_ZA_c.metabin.21	Bacteria	Acidobacteriota	Vicinamibacteria	Vicinamibacterales	Vicinamibacteraceae	Luteitalea	NA
DTU_2017_417_3_MG_NG_ZA_c.metabin.39	Bacteria	Proteobacteria	Alphaproteobacteria	Rhodobacterales	Rhodobacteraceae	Gemmobacter	NA
DTU_2017_417_3_MG_NG_ZA_c.metabin.42	Bacteria	Bacteroidetes	Bacteroidia	Flavobacteriales	GCA-002722245	NA	NA
DTU_2017_417_3_MG_NG_ZA_c.metabin.43	Bacteria	Bacteroidetes	Bacteroidia	Chitinophagales	Chitinophagaceae	UBA1931	NA
DTU_2017_417_3_MG_NG_ZA_c.metabin.4	Bacteria	Planctomycetota	Planctomycetes	Pirellulales	UBA1268	UBA4655	NA
DTU_2017_417_3_MG_NG_ZA_c.metabin.80	Bacteria	Verrucomicrobiota	Verrucomicrobiae	Verrucomicrobiales	NA	NA	NA
DTU_2017_417_3_MG_NG_ZA_c.metabin.84	Bacteria	Proteobacteria	Alphaproteobacteria	Acetobacterales	Acetobacteraceae	Ga0074136	NA
DTU_2017_417_3_MG_NG_ZA_c.vambbin.24891	Bacteria	Actinobacteriota	Acidimicrobiia	Microtrichales	Ilumatobacteraceae	NA	NA
DTU_2017_417_3_MG_NG_ZA_c.vambbin.27102	Bacteria	Bdellovibrionota	UBA2361	UBA2361	NA	NA	NA
DTU_2017_418_1_MG_NG_IB_a.metabin.36	Bacteria	Firmicutes	Negativicutes	Selenomonadales	Selenomonadaceae	Selenomonas	NA
DTU_2017_418_1_MG_NG_IB_a.metabin.60	Bacteria	Bacteroidetes	Bacteroidia	Flavobacteriales	Weeksellaceae	NA	NA
DTU_2017_418_1_MG_NG_IB_a.vambbin.22839	Bacteria	Firmicutes	Clostridia	Tissierellales	Peptoniphilaceae	Neofamilia	NA
DTU_2017_419_2_MG_NG_IB_b.vambbin.614	Bacteria	Proteobacteria	Gammaproteobacteria	Burkholderiales	Burkholderiaceae	Curvibacter	NA
DTU_2017_420_1_MG_NI_MN.metabin.67	Bacteria	Verrucomicrobiota	Verrucomicrobiae	Verrucomicrobiales	Akkermansiaceae	Haloferula	NA
DTU_2017_420_1_MG_NI_MN.vambbin.17631	Bacteria	Proteobacteria	Alphaproteobacteria	Sphingomonadales	Sphingomonadaceae	NA	NA
DTU_2017_420_1_MG_NI_MN.vambbin.34263	Bacteria	Cyanobacteria	Cyanobacteriia	Synechococcales	Cyanobiaceae	PCC7001	NA
DTU_2017_422_1_MG_NI_GR.metabin.22	Bacteria	Proteobacteria	Alphaproteobacteria	Caulobacterales	Caulobacteraceae	Brevundimonas	NA
DTU_2017_422_1_MG_NI_GR.metabin.27	Bacteria	Verrucomicrobiota	Verrucomicrobiae	Chthoniobacterales	Chthoniobacteraceae	NA	NA
DTU_2017_422_1_MG_NI_GR.metabin.30	Bacteria	Verrucomicrobiota	Verrucomicrobiae	Chthoniobacterales	Terrimicrobiaceae	NA	NA
DTU_2017_422_1_MG_NI_GR.metabin.56	Bacteria	Planctomycetota	Phycisphaerae	Phycisphaerales	SM1A02	UBA2402	NA
DTU_2017_422_1_MG_NI_GR.metabin.57	Bacteria	Proteobacteria	Gammaproteobacteria	Burkholderiales	Burkholderiaceae	NA	NA
DTU_2017_422_1_MG_NI_GR.metabin.66	Bacteria	Proteobacteria	Gammaproteobacteria	Burkholderiales	Burkholderiaceae	Rubrivivax	NA
DTU_2017_424_1_MG_TZ_MS.vambbin.994	Bacteria	Proteobacteria	Gammaproteobacteria	Enterobacterales	Enterobacteriaceae	Hafnia	Hafnia alvei
DTU_2017_425_1_MG_EE_TA.metabin.41	Bacteria	Proteobacteria	Gammaproteobacteria	Burkholderiales	Burkholderiaceae	Polaromonas	NA
DTU_2017_425_1_MG_EE_TA.metabin.9	Bacteria	Chloroflexota	Anaerolineae	Caldilineales	Caldilineaceae	NA	NA
DTU_2017_425_1_MG_EE_TA.vambbin.21658	Bacteria	Bacteroidetes	Bacteroidia	Chitinophagales	Saprospiraceae	OLB9	NA
DTU_2017_425_1_MG_EE_TA.vambbin.223	Bacteria	Actinobacteriota	Acidimicrobiia	Microtrichales	Microtrichaceae	Microthrix	Microthrix parvicella
DTU_2017_426_1_MG_EE_TL.metabin.19	Bacteria	Chloroflexota	Anaerolineae	Anaerolineales	Anaerolineaceae	Flexilinea	Flexilinea sp002329625
DTU_2017_427_1_MG_EE_PR.metabin.20	Bacteria	Proteobacteria	Gammaproteobacteria	Burkholderiales	Burkholderiaceae	Comamonas	Comamonas kerstersii
DTU_2017_428_1_MG_EE_NA.vambbin.593	Bacteria	Proteobacteria	Gammaproteobacteria	Burkholderiales	Burkholderiaceae	NA	NA
DTU_2017_429_1_MG_TH_PA.metabin.55	Bacteria	Firmicutes	Negativicutes	Selenomonadales	Selenomonadaceae	NA	NA
DTU_2017_430_1_MG_GE_KU.metabin.84	Bacteria	Firmicutes	Bacilli	Lactobacillales	Lactobacillaceae	Leuconostoc	Leuconostoc lactis
DTU_2017_430_1_MG_GE_KU.metabin.86	Bacteria	Firmicutes	Bacilli	Lactobacillales	Lactobacillaceae	Leuconostoc	Leuconostoc pseudomesenteroides
DTU_2017_430_1_MG_GE_KU.metabin.92	Bacteria	Proteobacteria	Alphaproteobacteria	Micavibrionales	Micavibrionaceae	Micavibrio	NA
DTU_2017_430_1_MG_GE_KU.vambbin.1036991	Bacteria	Proteobacteria	Alphaproteobacteria	Micavibrionales	Micavibrionaceae	UBA6145	NA
DTU_2017_430_1_MG_GE_KU.vambbin.12400	Bacteria	Verrucomicrobiota	Verrucomicrobiae	Verrucomicrobiales	Akkermansiaceae	UBA1315	NA
DTU_2017_430_1_MG_GE_KU.vambbin.1499	Bacteria	Firmicutes	Bacilli	Lactobacillales	Streptococcaceae	Lactococcus	Lactococcus raffinolactis
DTU_2017_430_1_MG_GE_KU.vambbin.20975	Bacteria	Proteobacteria	Alphaproteobacteria	Sphingomonadales	Sphingomonadaceae	Sphingomonas	NA
DTU_2017_432_1_MG_ZA_PR.metabin.30	Bacteria	Actinobacteriota	Actinobacteria	Actinomycetales	Bifidobacteriaceae	Bifidobacterium	Bifidobacterium longum
DTU_2017_432_1_MG_ZA_PR.vambbin.1154	Bacteria	Synergistota	Synergistia	Synergistales	Synergistaceae	NA	NA
DTU_2017_434_1_MG_IT_RO.metabin.39	Bacteria	Bacteroidetes	Bacteroidia	Cytophagales	Hymenobacteraceae	NA	NA
DTU_2017_434_1_MG_IT_RO.vambbin.21484	Bacteria	Proteobacteria	Gammaproteobacteria	Burkholderiales	Palsa-1005	NA	NA
DTU_2017_434_1_MG_IT_RO.vambbin.31930	Bacteria	Bacteroidetes	Bacteroidia	Sphingobacteriales	Sphingobacteriaceae	Pedobacter	NA
DTU_2017_434_1_MG_IT_RO.vambbin.8937	Bacteria	Myxococcota	Polyangia	Haliangiales	Haliangiaceae	NA	NA
DTU_2017_435_1_MG_KR_GW.vambbin.20805	Bacteria	Verrucomicrobiota	Verrucomicrobiae	Verrucomicrobiales	NA	NA	NA
DTU_2017_435_1_MG_KR_GW.vambbin.270	Bacteria	Proteobacteria	Gammaproteobacteria	Thiotrichales	Thiotrichaceae	NA	NA
DTU_2017_435_1_MG_KR_GW.vambbin.39621	Bacteria	Proteobacteria	Gammaproteobacteria	Thiotrichales	Thiotrichaceae	Thiolinea	Thiolinea disciformis
DTU_2017_436_1_MG_GR_TH.metabin.41	Bacteria	Cloacimonadota	Cloacimonadia	Cloacimonadales	Cloacimonadaceae	Cloacimonas	NA
DTU_2017_436_1_MG_GR_TH.metabin.78	Bacteria	Desulfobacterota	Syntrophia	Syntrophales	UBA5619	UBA5619	NA
DTU_2017_436_1_MG_GR_TH.metabin.99	Bacteria	Bacteroidetes	Bacteroidia	Bacteroidales	TTA-H9	NA	NA
DTU_2017_436_1_MG_GR_TH.vambbin.1108	Bacteria	Verrucomicrobiota	Verrucomicrobiae	Pedosphaerales	Pedosphaeraceae	UBA8199	UBA8199 sp003527065
DTU_2017_436_1_MG_GR_TH.vambbin.15953	Bacteria	Spirochaetota	UBA12135	NA	NA	NA	NA
DTU_2017_436_1_MG_GR_TH.vambbin.20052	Bacteria	Verrucomicrobiota	Kiritimatiellae	NA	NA	NA	NA
DTU_2017_436_1_MG_GR_TH.vambbin.222	Bacteria	Verrucomicrobiota	Kiritimatiellae	LD1-PB3	Lenti-01	Lenti-01	NA
DTU_2017_436_1_MG_GR_TH.vambbin.51249	Bacteria	Sumerlaeota	Sumerlaeia	NA	NA	NA	NA
DTU_2017_438_1_MG_PT_PO.vambbin.40552	Bacteria	Proteobacteria	Gammaproteobacteria	Burkholderiales	Rhodocyclaceae	Dechloromonas	NA
DTU_2017_439_1_MG_GB_ED.vambbin.1224	Bacteria	Actinobacteriota	Actinobacteria	Actinomycetales	Bifidobacteriaceae	Bifidobacterium	Bifidobacterium thermacidophilum
DTU_2017_440_1_MG_CA_RE.vambbin.172	Bacteria	Firmicutes	Bacilli	Lactobacillales	Streptococcaceae	Streptococcus	NA
DTU_2017_440_1_MG_CA_RE.vambbin.627	Bacteria	Actinobacteriota	Coriobacteriia	Coriobacteriales	Eggerthellaceae	Gordonibacter	NA
DTU_2017_442_1_MG_CA_CA.metabin.23	Bacteria	Actinobacteriota	Coriobacteriia	Coriobacteriales	Atopobiaceae	RUG721	NA
DTU_2017_442_1_MG_CA_CA.metabin.63	Bacteria	Actinobacteriota	Coriobacteriia	Coriobacteriales	Eggerthellaceae	NA	NA
DTU_2017_442_1_MG_CA_CA.metabin.9	Bacteria	Firmicutes	Clostridia	Christensenellales	CAG-74	RUG563	NA
DTU_2017_442_1_MG_CA_CA.vambbin.12078	Bacteria	Bacteroidetes	Bacteroidia	Bacteroidales	Dysgonomonadaceae	Proteiniphilum	NA
DTU_2017_443_1_MG_CA_OT.metabin.48	Bacteria	Actinobacteriota	Actinobacteria	Propionibacteriales	Propionibacteriaceae	Fen-668	NA
DTU_2017_443_1_MG_CA_OT.metabin.54	Bacteria	Proteobacteria	Gammaproteobacteria	Burkholderiales	Burkholderiaceae	SCGC-AAA027-K21	NA
DTU_2017_443_1_MG_CA_OT.vambbin.426	Bacteria	Actinobacteriota	Actinobacteria	Actinomycetales	Dermatophilaceae	Phycicoccus	NA
DTU_2017_443_1_MG_CA_OT.vambbin.6167	Bacteria	Proteobacteria	Alphaproteobacteria	Rhodobacterales	Rhodobacteraceae	Pseudorhodobacter	NA
DTU_2017_445_1_MG_GB_NC.vambbin.18941	Bacteria	Proteobacteria	Gammaproteobacteria	Burkholderiales	Burkholderiaceae	Oligella	NA
DTU_2017_445_1_MG_GB_NC.vambbin.76901	Bacteria	Firmicutes	Negativicutes	Acidaminococcales	Acidaminococcaceae	NA	NA
DTU_2017_447_1_MG_UG_KA.metabin.38	Bacteria	Desulfobacterota	Desulfovibrionia	Desulfovibrionales	Desulfovibrionaceae	NA	NA
DTU_2017_448_1_MG_IN_MP.metabin.12	Bacteria	Verrucomicrobiota	Kiritimatiellae	RFP12	UBA1067	NA	NA
DTU_2017_448_1_MG_IN_MP.metabin.61	Bacteria	Bacteroidetes	Bacteroidia	Bacteroidales	Paludibacteraceae	NA	NA
DTU_2017_448_1_MG_IN_MP.metabin.86	Bacteria	Sumerlaeota	Sumerlaeia	UBA8349	NA	NA	NA
DTU_2017_448_1_MG_IN_MP.vambbin.29070	Bacteria	Proteobacteria	Gammaproteobacteria	Burkholderiales	Rhodocyclaceae	Propionivibrio	NA
DTU_2017_449_1_MG_NO_OS.metabin.54	Bacteria	Proteobacteria	Gammaproteobacteria	Burkholderiales	Methylophilaceae	Methylotenera	NA
DTU_2017_452_1_MG_BF_OU.metabin.49	Bacteria	UBA10199	UBA10199	2-02-FULL-44-16	NA	NA	NA
DTU_2017_452_1_MG_BF_OU.metabin.60	Bacteria	Firmicutes	Clostridia	Peptostreptococcales	Filifactoraceae	Proteocatella	NA
DTU_2017_452_1_MG_BF_OU.vambbin.11505	Archaea	Halobacterota	Methanosarcinia	Methanotrichales	Methanotrichaceae	Methanothrix	NA
DTU_2017_452_1_MG_BF_OU.vambbin.33728	Bacteria	Firmicutes	Bacilli	Lactobacillales	Enterococcaceae	Enterococcus	Enterococcus
DTU_2017_453_1_MG_BF_BO.metabin.22	Bacteria	Proteobacteria	Alphaproteobacteria	Rhodobacterales	Rhodobacteraceae	Paracoccus	NA
DTU_2017_453_1_MG_BF_BO.metabin.29	Bacteria	Proteobacteria	Alphaproteobacteria	Sphingomonadales	Sphingomonadaceae	Novosphingobium	NA
DTU_2017_453_1_MG_BF_BO.metabin.65	Bacteria	Bacteroidetes	Bacteroidia	Flavobacteriales	Weeksellaceae	Cloacibacterium	NA
DTU_2017_453_1_MG_BF_BO.metabin.68	Bacteria	Verrucomicrobiota	Kiritimatiellae	NA	NA	NA	NA
DTU_2017_453_1_MG_BF_BO.metabin.6	Bacteria	Verrucomicrobiota	Verrucomicrobiae	Chthoniobacterales	NA	NA	NA
DTU_2017_453_1_MG_BF_BO.metabin.8	Bacteria	Bacteroidetes	Bacteroidia	Sphingobacteriales	Sphingobacteriaceae	Sphingobacterium	Sphingobacterium thalpophilum
DTU_2017_453_1_MG_BF_BO.vambbin.10213	Bacteria	Proteobacteria	Alphaproteobacteria	Acetobacterales	Acetobacteraceae	Roseomonas	NA
DTU_2017_453_1_MG_BF_BO.vambbin.10266	Bacteria	Firmicutes	Bacilli	Lactobacillales	Enterococcaceae	Enterococcus	Enterococcus
DTU_2017_453_1_MG_BF_BO.vambbin.125243	Bacteria	Proteobacteria	Alphaproteobacteria	Rhizobiales	Stappiaceae	Pannonibacter	Pannonibacter phragmitetus
DTU_2017_454_1_MG_SG_JU.vambbin.805	Bacteria	Desulfobacterota	Desulfobulbia	Desulfobulbales	Desulfobulbaceae	ORNL	NA
DTU_2017_456_1_MG_NP_KA.metabin.28	Bacteria	Proteobacteria	Gammaproteobacteria	Pseudomonadales	Pseudomonadaceae	Pseudomonas	NA
DTU_2017_456_1_MG_NP_KA.metabin.33	Bacteria	Proteobacteria	Gammaproteobacteria	Enterobacterales	Enterobacteriaceae	Enterobacter	Enterobacter nimipressuralis
DTU_2017_456_1_MG_NP_KA.vambbin.191152	Bacteria	Proteobacteria	Gammaproteobacteria	Burkholderiales	Methylophilaceae	Methylotenera	NA
DTU_2017_456_1_MG_NP_KA.vambbin.296817	Bacteria	Proteobacteria	Gammaproteobacteria	Burkholderiales	Burkholderiaceae	B-9	B-9 sp003105075
DTU_2017_456_1_MG_NP_KA.vambbin.8563	Bacteria	Bacteroidetes	Bacteroidia	Flavobacteriales	Weeksellaceae	Chryseobacterium	NA
DTU_2017_457_1_MG_KH_PP.metabin.26	Bacteria	Firmicutes	Bacilli	Erysipelotrichales	Erysipelotrichaceae	UBA2212	NA
DTU_2017_457_1_MG_KH_PP.metabin.28	Bacteria	Bacteroidetes	Bacteroidia	Bacteroidales	vadinHA17	SR-FBR-E99	NA
DTU_2017_457_1_MG_KH_PP.metabin.42	Archaea	Halobacterota	Methanomicrobia	Methanomicrobiales	Methanoregulaceae	UBA9949	NA
DTU_2017_457_1_MG_KH_PP.metabin.85	Bacteria	Verrucomicrobiota	Kiritimatiellae	LD1-PB3	GWF2-57-35	NA	NA
DTU_2017_457_1_MG_KH_PP.vambbin.188831	Bacteria	Actinobacteriota	Coriobacteriia	Coriobacteriales	Eggerthellaceae	Raoultibacter	NA
DTU_2017_457_1_MG_KH_PP.vambbin.19763	Bacteria	Acidobacteriota	Vicinamibacteria	Vicinamibacterales	Fen-181	FEN-299	NA
DTU_2017_458_1_MG_GT_GU.vambbin.11184	Bacteria	Proteobacteria	Gammaproteobacteria	Burkholderiales	Neisseriaceae	Vitreoscilla	NA
DTU_2017_460_1_MG_KE_NA.vambbin.58356	Bacteria	Chloroflexota	Anaerolineae	NA	NA	NA	NA
DTU_2017_465_1_MG_IR_TH.metabin.29	Bacteria	Actinobacteriota	Actinobacteria	Propionibacteriales	Nocardioidaceae	Nocardioides	NA
DTU_2017_465_1_MG_IR_TH.metabin.37	Bacteria	Bacteroidetes	Bacteroidia	Sphingobacteriales	Sphingobacteriaceae	NA	NA
DTU_2017_465_1_MG_IR_TH.metabin.78	Bacteria	Proteobacteria	Alphaproteobacteria	Caulobacterales	Caulobacteraceae	Brevundimonas	NA
DTU_2017_465_1_MG_IR_TH.vambbin.1463	Bacteria	Chloroflexota	Anaerolineae	Anaerolineales	envOPS12	OLB14	OLB14 sp001567105
DTU_2017_468_1_MG_LK_MO.metabin.13	Bacteria	Proteobacteria	Gammaproteobacteria	Burkholderiales	Burkholderiaceae	NA	NA
DTU_2017_468_1_MG_LK_MO.metabin.20	Bacteria	Verrucomicrobiota	Verrucomicrobiae	Opitutales	Opitutaceae	Didemnitutus	NA
DTU_2017_468_1_MG_LK_MO.metabin.23	Bacteria	Acidobacteriota	Acidobacteriae	Bryobacterales	Bryobacteraceae	NA	NA
DTU_2017_468_1_MG_LK_MO.metabin.29	Bacteria	Verrucomicrobiota	Chlamydiia	Parachlamydiales	NA	NA	NA
DTU_2017_468_1_MG_LK_MO.metabin.43	Bacteria	Bacteroidetes	Bacteroidia	Chitinophagales	Saprospiraceae	NA	NA
DTU_2017_468_1_MG_LK_MO.metabin.57	Bacteria	Proteobacteria	Alphaproteobacteria	Rhodospirillales	2-12-FULL-67-15	NA	NA
DTU_2017_468_1_MG_LK_MO.metabin.72	Bacteria	UBA10199	UBA10199	2-02-FULL-44-16	NA	NA	NA
DTU_2017_468_1_MG_LK_MO.metabin.74	Bacteria	Planctomycetota	Phycisphaerae	UBA1845	Fen-1342	Fen-1342	NA
DTU_2017_468_1_MG_LK_MO.vambbin.127853	Bacteria	Acidobacteriota	Blastocatellia	Pyrinomonadales	Pyrinomonadaceae	OLB17	NA
DTU_2017_468_1_MG_LK_MO.vambbin.14689	Bacteria	Firmicutes	Negativicutes	Selenomonadales	Selenomonadaceae	NA	NA
DTU_2017_468_1_MG_LK_MO.vambbin.2429	Bacteria	Proteobacteria	Alphaproteobacteria	Sphingomonadales	Sphingomonadaceae	Novosphingobium	NA
DTU_2017_468_1_MG_LK_MO.vambbin.86087	Bacteria	SM23-31	SM23-31	NA	NA	NA	NA
DTU_2017_470_1_MG_LK_CO.metabin.49	Bacteria	Bacteroidetes	Bacteroidia	Bacteroidales	Bacteroidaceae	Prevotella	Prevotella sp002409785
DTU_2017_472_1_MG_IR_SH.vambbin.5321	Bacteria	Bacteroidetes	Bacteroidia	Bacteroidales	Dysgonomonadaceae	Dysgonomonas	NA
DTU_2017_487_1_MG_CN_GU_183.metabin.64	Bacteria	Bdellovibrionota	UBA2361	SZUA-149	SZUA-149	NA	NA
DTU_2017_487_1_MG_CN_GU_183.vambbin.435	Bacteria	Proteobacteria	Gammaproteobacteria	Burkholderiales	Burkholderiaceae	NA	NA
DTU_2017_488_1_MG_TH_ST_184.metabin.42	Bacteria	Verrucomicrobiota	Verrucomicrobiae	Pedosphaerales	UBA9464	UBA9464	NA
DTU_2017_488_1_MG_TH_ST_184.metabin.82	Bacteria	Proteobacteria	Gammaproteobacteria	Burkholderiales	Burkholderiaceae	UBA3064	NA
DTU_2017_489_1_MG_IT_NO_185.metabin.72	Bacteria	Actinobacteriota	Actinobacteria	Actinomycetales	Bifidobacteriaceae	Bifidobacterium	Bifidobacterium bifidum
DTU_2017_489_1_MG_IT_NO_185.vambbin.157736	Bacteria	Firmicutes	Bacilli	Lactobacillales	Lactobacillaceae	Lactobacillus	Lactobacillus
DTU_2017_490_1_MG_IT_VE_186.metabin.104	Bacteria	Firmicutes	Clostridia	Saccharofermentanales	Saccharofermentanaceae	Firm-13	NA
DTU_2017_490_1_MG_IT_VE_186.metabin.15	Bacteria	Firmicutes	Clostridia	Christensenellales	CAG-138	UBA7703	NA
DTU_2017_490_1_MG_IT_VE_186.metabin.46	Bacteria	Actinobacteriota	Actinobacteria	Mycobacteriales	Mycobacteriaceae	Mycolicibacter	NA
DTU_2017_490_1_MG_IT_VE_186.metabin.50	Bacteria	Verrucomicrobiota	Verrucomicrobiae	Opitutales	Verruco-01	Verruco-01	NA
DTU_2017_490_1_MG_IT_VE_186.metabin.96	Bacteria	Fibrobacterota	Fibrobacteria	UBA5070	UBA5070	UBA5070	NA
DTU_2017_490_1_MG_IT_VE_186.metabin.97	Bacteria	Actinobacteriota	Thermoleophilia	Solirubrobacterales	70-9	NA	NA
DTU_2017_490_1_MG_IT_VE_186.vambbin.19136	Bacteria	Proteobacteria	Alphaproteobacteria	Rhizobiales	Beijerinckiaceae	Rhodoblastus	NA
DTU_2017_490_1_MG_IT_VE_186.vambbin.51599	Bacteria	Firmicutes	Clostridia	Oscillospirales	Oscillospiraceae	UBA2658	NA
DTU_2017_492_1_MG_SE_GO_188.vambbin.1061	Bacteria	Proteobacteria	Gammaproteobacteria	Pseudomonadales	Moraxellaceae	Acinetobacter	NA
DTU_2017_493_1_MG_AT_VI_189.metabin.24	Bacteria	Actinobacteriota	Coriobacteriia	Coriobacteriales	Atopobiaceae	RUG721	NA
DTU_2017_493_1_MG_AT_VI_189.metabin.53	Bacteria	Actinobacteriota	Actinobacteria	Actinomycetales	Beutenbergiaceae	Serinibacter	NA
DTU_2017_493_1_MG_AT_VI_189.vambbin.33061	Bacteria	Cloacimonadota	Cloacimonadia	Cloacimonadales	Cloacimonadaceae	NA	NA
DTU_2017_497_1_MG_GR_AT_193.metabin.9	Bacteria	Cloacimonadota	Cloacimonadia	Cloacimonadales	Cloacimonadaceae	NA	NA
DTU_2017_498_1_MG_NI_LE_194.vambbin.1133	Bacteria	Proteobacteria	Gammaproteobacteria	Burkholderiales	Burkholderiaceae	NA	NA
DTU_2017_501_1_MG_AU_MA_197.metabin.29	Bacteria	Firmicutes	Bacilli	Lactobacillales	Streptococcaceae	Streptococcus	Streptococcus ferus
DTU_2017_501_1_MG_AU_MA_197.metabin.35	Bacteria	Firmicutes	Bacilli	Lactobacillales	Lactobacillaceae	Lactobacillus	Lactobacillus
DTU_2017_501_1_MG_AU_MA_197.vambbin.24481	Bacteria	Firmicutes	Bacilli	Lactobacillales	Streptococcaceae	Lactococcus	Lactococcus garvieae
DTU_2017_503_1_MG_BE_BR_199.vambbin.55722	Archaea	Halobacterota	Methanosarcinia	Methanotrichales	Methanotrichaceae	Methanothrix	NA
DTU_2017_504_1_MG_BE_AN_200.metabin.15	Bacteria	Proteobacteria	Gammaproteobacteria	Thiotrichales	Thiotrichaceae	Thiothrix	NA
DTU_2017_504_1_MG_BE_AN_200.vambbin.28030	Bacteria	Proteobacteria	Gammaproteobacteria	Burkholderiales	Burkholderiaceae	Achromobacter	NA
DTU_2017_505_1_MG_BE_DE_201.vambbin.940	Bacteria	Proteobacteria	Gammaproteobacteria	Thiotrichales	Thiotrichaceae	Thiolinea	NA
DTU_2017_507_1_MG_FR_SA_203.metabin.18	Bacteria	Bacteroidetes	Bacteroidia	Chitinophagales	Chitinophagaceae	Ferruginibacter	NA
DTU_2017_507_1_MG_FR_SA_203.metabin.47	Bacteria	Actinobacteriota	Acidimicrobiia	Microtrichales	UBA8139	NA	NA
DTU_2017_507_1_MG_FR_SA_203.metabin.4	Bacteria	Bacteroidetes	Bacteroidia	Flavobacteriales	PHOS-HE28	PHOS-HE28	NA
DTU_2017_507_1_MG_FR_SA_203.metabin.5	Bacteria	Bacteroidetes	Bacteroidia	Chitinophagales	Saprospiraceae	NA	NA
DTU_2017_507_1_MG_FR_SA_203.metabin.91	Bacteria	Verrucomicrobiota	Verrucomicrobiae	Verrucomicrobiales	DEV007	NA	NA
DTU_2017_507_1_MG_FR_SA_203.vambbin.12956	Bacteria	Acidobacteriota	Blastocatellia	Pyrinomonadales	Pyrinomonadaceae	OLB17	NA
DTU_2017_507_1_MG_FR_SA_203.vambbin.17857	Bacteria	Bacteroidetes	Bacteroidia	Flavobacteriales	PHOS-HE28	PHOS-HE28	NA
DTU_2017_507_1_MG_FR_SA_203.vambbin.28720	Bacteria	Chloroflexota	Anaerolineae	Anaerolineales	envOPS12	UBA12294	NA
DTU_2017_507_1_MG_FR_SA_203.vambbin.37562	Bacteria	Planctomycetota	UBA8742	UBA2392	UBA2392	NA	NA
DTU_2017_507_1_MG_FR_SA_203.vambbin.4497	Bacteria	Proteobacteria	Gammaproteobacteria	Steroidobacterales	Steroidobacteraceae	NA	NA
DTU_2017_507_1_MG_FR_SA_203.vambbin.5823	Bacteria	Bacteroidetes	Bacteroidia	Chitinophagales	Saprospiraceae	OLB9	NA
DTU_2017_507_1_MG_FR_SA_203.vambbin.59166	Bacteria	Bacteroidetes	Bacteroidia	Chitinophagales	Saprospiraceae	UBA3362	NA
DTU_2017_507_1_MG_FR_SA_203.vambbin.79843	Bacteria	Bacteroidetes	Bacteroidia	Chitinophagales	Saprospiraceae	UBA3362	NA
DTU_2017_509_1_MG_CZ_PR_205.vambbin.858	Bacteria	Proteobacteria	Gammaproteobacteria	Burkholderiales	Rhodocyclaceae	Dechloromonas	NA
DTU_2017_509_1_MG_CZ_PR_205.vambbin.905	Bacteria	Proteobacteria	Gammaproteobacteria	Burkholderiales	Burkholderiaceae	Brachymonas	NA
DTU_2017_510_1_MG_CZ_BR_206.vambbin.3636	Bacteria	Firmicutes	Bacilli	Erysipelotrichales	Erysipelotrichaceae	Erysipelothrix	NA
DTU_2017_512_1_MG_ZA_PR_208.metabin.42	Bacteria	Firmicutes	Clostridia	Lachnospirales	Lachnospiraceae	NA	NA
DTU_2017_512_1_MG_ZA_PR_208.vambbin.34350	Bacteria	Cyanobacteria	Cyanobacteriia	Cyanobacteriales	Phormidiaceae	Microcoleus	NA
DTU_2017_513_1_MG_BA_BL_209.vambbin.1800	Bacteria	Proteobacteria	Gammaproteobacteria	Pseudomonadales	Pseudomonadaceae	Pseudomonas	NA
DTU_2017_515_1_MG_TZ_MO_211.metabin.77	Archaea	Euryarchaeota	Methanobacteria	Methanobacteriales	Methanobacteriaceae	Methanobacterium	Methanobacterium formicicum
DTU_2017_517_1_MG_BJ_NV_213.metabin.116	Bacteria	Campylobacterota	Campylobacteria	Campylobacterales	Sulfurospirillaceae	Sulfurospirillum	Sulfurospirillum sp001548035
DTU_2017_517_1_MG_BJ_NV_213.metabin.133	Bacteria	Proteobacteria	Gammaproteobacteria	Burkholderiales	Burkholderiaceae	Acidovorax	Acidovorax
DTU_2017_517_1_MG_BJ_NV_213.metabin.39	Bacteria	Bacteroidetes	Bacteroidia	Bacteroidales	WCHB1-69	UBA5429	NA
DTU_2017_519_1_MG_BJ_SB_215.metabin.11	Bacteria	Proteobacteria	Gammaproteobacteria	Burkholderiales	Burkholderiaceae	Castellaniella	NA
DTU_2017_519_1_MG_BJ_SB_215.metabin.24	Bacteria	Bacteroidetes	Bacteroidia	Flavobacteriales	PHOS-HE28	NA	NA
DTU_2017_520_1_MG_TH_BK_216.metabin.107	Bacteria	Bacteroidetes	Ignavibacteria	SJA-28	B-1AR	NA	NA
DTU_2017_521_1_MG_KR_DA_217.vambbin.6754	Bacteria	Firmicutes	Bacilli	Lactobacillales	Streptococcaceae	Lactococcus	Lactococcus plantarum
DTU_2017_524_1_MG_CI_YA_220.vambbin.2706	Bacteria	Proteobacteria	Gammaproteobacteria	Burkholderiales	Burkholderiaceae	UBA2334	NA
DTU_2017_525_1_MG_SA_KA_221.vambbin.121	Bacteria	Bacteroidetes	Bacteroidia	Bacteroidales	vadinHA17	SR-FBR-E99	NA
DTU_2017_525_1_MG_SA_KA_221.vambbin.1853	Bacteria	Proteobacteria	Gammaproteobacteria	Burkholderiales	Rhodocyclaceae	NA	NA
DTU_2017_525_1_MG_SA_KA_221.vambbin.2242	Bacteria	Proteobacteria	Gammaproteobacteria	Thiotrichales	Thiotrichaceae	NA	NA
DTU_2017_526_1_MG_SI_LJ_222.metabin.63	Bacteria	Chloroflexota	Anaerolineae	NA	NA	NA	NA
DTU_2017_526_1_MG_SI_LJ_222.vambbin.19114	Bacteria	Proteobacteria	Gammaproteobacteria	Pseudomonadales	Moraxellaceae	Psychrobacter	NA
DTU_2017_527_1_MG_ES_BA_223.vambbin.1241	Bacteria	Firmicutes	Negativicutes	Acidaminococcales	Acidaminococcaceae	NA	NA
DTU_2017_527_1_MG_ES_BA_223.vambbin.26043	Bacteria	Verrucomicrobiota	Verrucomicrobiae	Chthoniobacterales	Terrimicrobiaceae	NA	NA
DTU_2017_528_1_MG_SK_BR_224.metabin.43	Bacteria	Firmicutes	Clostridia	Oscillospirales	Acutalibacteraceae	GCA-900066995	GCA-900066995 sp900291955
DTU_2017_528_1_MG_SK_BR_224.metabin.69	Bacteria	Bacteroidetes	Bacteroidia	Bacteroidales	Rikenellaceae	Alistipes	Alistipes onderdonkii
DTU_2017_528_1_MG_SK_BR_224.vambbin.1297	Bacteria	Proteobacteria	Gammaproteobacteria	Pseudomonadales	Moraxellaceae	Acinetobacter	NA
DTU_2017_529_1_MG_GR_TH_225.vambbin.3783	Bacteria	Bacteroidetes	Bacteroidia	Chitinophagales	Saprospiraceae	OLB9	NA
DTU_2017_529_1_MG_GR_TH_225.vambbin.53602	Bacteria	Firmicutes	Clostridia	Lachnospirales	Lachnospiraceae	SZUA-378	NA
DTU_2017_530_1_MG_HK_HK_226.metabin.34	Bacteria	Thermotogota	Thermotogae	Petrotogales	Kosmotogaceae	Mesotoga	Mesotoga prima
DTU_2017_530_1_MG_HK_HK_226.metabin.75	Bacteria	Proteobacteria	Alphaproteobacteria	Rhodospirillales	2-12-FULL-67-15	NA	NA
DTU_2017_530_1_MG_HK_HK_226.vambbin.2583	Bacteria	Synergistota	Synergistia	Synergistales	Thermovirgaceae	58-81	NA
DTU_2017_530_1_MG_HK_HK_226.vambbin.609	Bacteria	Bacteroidetes	Bacteroidia	Chitinophagales	Saprospiraceae	OLB8	OLB8 sp001567405
DTU_2017_536_1_MG_MY_IP_232.vambbin.954	Bacteria	Proteobacteria	Gammaproteobacteria	Enterobacterales	Enterobacteriaceae	Enterobacter	NA
DTU_2017_538_1_MG_DE_BE_234.metabin.21	Bacteria	Acidobacteriota	Vicinamibacteria	Vicinamibacterales	UBA2999	NA	NA
DTU_2017_539_1_MG_HU_BU_235.metabin.109	Bacteria	Firmicutes	Bacilli	RFN20	CAG-826	UBA1361	UBA1361 sp002306335
DTU_2017_539_1_MG_HU_BU_235.metabin.11	Bacteria	Firmicutes	Clostridia	NA	NA	NA	NA
DTU_2017_541_1_MG_TD_ND_237.metabin.21	Bacteria	Verrucomicrobiota	Verrucomicrobiae	Chthoniobacterales	NA	NA	NA
DTU_2017_541_1_MG_TD_ND_237.metabin.37	Bacteria	Bacteroidetes	Bacteroidia	Bacteroidales	Paludibacteraceae	NA	NA
DTU_2017_541_1_MG_TD_ND_237.metabin.52	Bacteria	Proteobacteria	Gammaproteobacteria	Methylococcales	Methylococcaceae	UBA6136	NA
DTU_2017_541_1_MG_TD_ND_237.metabin.61	Bacteria	Verrucomicrobiota	Kiritimatiellae	NA	NA	NA	NA
DTU_2017_541_1_MG_TD_ND_237.vambbin.4965	Bacteria	Firmicutes	Negativicutes	Sporomusales	Thermosinaceae	NA	NA
DTU_2017_546_1_MG_GB_FA_242.metabin.35	Bacteria	Proteobacteria	Gammaproteobacteria	Burkholderiales	Rhodocyclaceae	Azospira	Azospira oryzae
DTU_2017_546_1_MG_GB_FA_242.vambbin.164	Bacteria	Proteobacteria	Gammaproteobacteria	Burkholderiales	Neisseriaceae	Neisseria	NA
DTU_2017_546_1_MG_GB_FA_242.vambbin.92602	Bacteria	Proteobacteria	Gammaproteobacteria	Burkholderiales	Burkholderiaceae	Cupriavidus	NA
DTU_2017_547_1_MG_JP_JP_243.vambbin.6914	Bacteria	Firmicutes	Clostridia	Lachnospirales	Lachnospiraceae	Agathobacter	Agathobacter faecis
DTU_2017_548_1_MG_IN_MP_244.metabin.17	Bacteria	Chloroflexota	Anaerolineae	UBA3071	CG2-30-64-16	NA	NA
DTU_2017_548_1_MG_IN_MP_244.metabin.32	Bacteria	Zixibacteria	MSB-5A5	GN15	2012-02-01	NA	NA
DTU_2017_549_1_MG_TH_PA_245.metabin.32	Bacteria	Firmicutes	Bacilli	Lactobacillales	Streptococcaceae	Streptococcus	Streptococcus suis
DTU_2017_549_1_MG_TH_PA_245.metabin.83	Bacteria	Verrucomicrobiota	Kiritimatiellae	NA	NA	NA	NA
DTU_2017_549_1_MG_TH_PA_245.vambbin.4874	Bacteria	Desulfuromonadota	Desulfuromonadia	Geobacterales	Pelobacteraceae	Geobacter	NA
DTU_2017_550_1_MG_BB_BR_246.vambbin.2182	Bacteria	Proteobacteria	Gammaproteobacteria	Pseudomonadales	Moraxellaceae	Psychrobacter	NA
DTU_2017_551_1_MG_BB_WO_247.metabin.41	Bacteria	Proteobacteria	Gammaproteobacteria	Burkholderiales	Burkholderiaceae	NA	NA
DTU_2017_552_1_MG_PY_SL_248.vambbin.10123	Bacteria	Proteobacteria	Gammaproteobacteria	Methylococcales	Methylococcaceae	UBA6136	NA
DTU_2017_552_1_MG_PY_SL_248.vambbin.3542	Bacteria	Desulfobacterota	Syntrophia	Syntrophales	Fen-1087	Fen-1087	NA
DTU_2017_552_1_MG_PY_SL_248.vambbin.683	Bacteria	Bacteroidetes	Bacteroidia	Bacteroidales	Prolixibacteraceae	NA	NA
DTU_2017_553_1_MG_PK_KA_249.vambbin.25275	Bacteria	Proteobacteria	Gammaproteobacteria	Acidithiobacillales	Acidithiobacillaceae	Acidithiobacillus	NA
DTU_2017_553_1_MG_PK_KA_249.vambbin.32278	Bacteria	Proteobacteria	Gammaproteobacteria	Halothiobacillales	Halothiobacillaceae	NA	NA
DTU_2017_553_1_MG_PK_KA_249.vambbin.42338	Bacteria	Proteobacteria	Gammaproteobacteria	Acidithiobacillales	Acidithiobacillaceae	Acidithiobacillus	NA
DTU_2017_555_1_MG_HU_SK_251.metabin.64	Bacteria	Caldisericota	Caldisericia	NA	NA	NA	NA
DTU_2017_555_1_MG_HU_SK_251.metabin.81	Bacteria	Acidobacteriota	Thermoanaerobaculia	UBA5704	NA	NA	NA
DTU_2017_555_1_MG_HU_SK_251.vambbin.3563	Bacteria	Firmicutes	Clostridia	Saccharofermentanales	Saccharofermentanaceae	Saccharofermentans	NA
DTU_2017_555_1_MG_HU_SK_251.vambbin.4944	Bacteria	Firmicutes	Bacilli	Lactobacillales	Streptococcaceae	Streptococcus	NA
DTU_2017_555_1_MG_HU_SK_251.vambbin.9776	Bacteria	Firmicutes	Clostridia	Christensenellales	CAG-74	DTU024	NA
DTU_2017_556_1_MG_CA_QE_252.metabin.18	Bacteria	Firmicutes	Clostridia	Oscillospirales	Oscillospiraceae	UBA2658	NA
DTU_2017_559_1_MG_PL_PL_255.metabin.56	Bacteria	Actinobacteriota	Actinobacteria	Actinomycetales	Microbacteriaceae	Cryobacterium	NA
DTU_2017_559_1_MG_PL_PL_255.metabin.93	Bacteria	Bacteroidetes	Bacteroidia	Bacteroidales	Paludibacteraceae	NA	NA
DTU_2017_559_1_MG_PL_PL_255.vambbin.126518	Bacteria	Bacteroidetes	Bacteroidia	Flavobacteriales	PHOS-HE28	PHOS-HE28	NA
DTU_2017_559_1_MG_PL_PL_255.vambbin.20506	Bacteria	Caldisericota	Caldisericia	NA	NA	NA	NA
DTU_2017_559_1_MG_PL_PL_255.vambbin.5128	Bacteria	Proteobacteria	Gammaproteobacteria	Xanthomonadales	Xanthomonadaceae	Thermomonas	NA
DTU_2017_559_1_MG_PL_PL_255.vambbin.7958	Bacteria	Cloacimonadota	Cloacimonadia	Cloacimonadales	Cloacimonadaceae	UBA4175	NA
DTU_2017_560_1_MG_NG_LA_256.vambbin.411	Bacteria	Desulfobacterota	Desulfovibrionia	Desulfovibrionales	Desulfovibrionaceae	NA	NA
DTU_2017_565_1_MG_LB_SM_261.metabin.17	Bacteria	Proteobacteria	Gammaproteobacteria	Burkholderiales	Burkholderiaceae	Acidovorax	NA
DTU_2017_568_1_MG_EE_TL_264.vambbin.571	Bacteria	Proteobacteria	Gammaproteobacteria	Pseudomonadales	Moraxellaceae	Psychrobacter	NA
DTU_2017_569_1_MG_EE_TA_265.metabin.12	Bacteria	Proteobacteria	Gammaproteobacteria	Competibacterales	Competibacteraceae	Contendobacter	NA
DTU_2017_569_1_MG_EE_TA_265.vambbin.1313	Bacteria	Nitrospirota	Nitrospiria	Nitrospirales	Nitrospiraceae	Nitrospira	Nitrospira
DTU_2017_569_1_MG_EE_TA_265.vambbin.8249	Bacteria	Bacteroidetes	Bacteroidia	Chitinophagales	Chitinophagaceae	JJ008	NA
DTU_2017_571_1_MG_EE_NA_267.vambbin.862	Bacteria	Proteobacteria	Gammaproteobacteria	Pseudomonadales	Pseudomonadaceae	Pseudomonas	Pseudomonas
DTU_2017_572_1_MG_SE_UP_268.metabin.27	Bacteria	Proteobacteria	Gammaproteobacteria	Xanthomonadales	Xanthomonadaceae	Stenotrophomonas	Stenotrophomonas acidaminiphila
DTU_2017_575_1_MG_PT_PO_271.metabin.48	Bacteria	Actinobacteriota	Actinobacteria	Mycobacteriales	Mycobacteriaceae	Mycolicibacterium	NA
DTU_2017_575_1_MG_PT_PO_271.vambbin.15793	Bacteria	Proteobacteria	Gammaproteobacteria	Chromatiales	Chromatiaceae	NA	NA
DTU_2017_575_1_MG_PT_PO_271.vambbin.6400	Bacteria	Proteobacteria	Gammaproteobacteria	Pseudomonadales	Moraxellaceae	Moraxella	NA
DTU_2017_577_1_MG_BF_OU_273.metabin.55	Bacteria	Bacteroidetes	Bacteroidia	Bacteroidales	Porphyromonadaceae	Porphyromonas	NA
DTU_2017_577_1_MG_BF_OU_273.metabin.62	Bacteria	Proteobacteria	Gammaproteobacteria	Burkholderiales	Burkholderiaceae	Brachymonas	NA
DTU_2017_577_1_MG_BF_OU_273.vambbin.12511	Bacteria	Synergistota	Synergistia	Synergistales	Aminobacteriaceae	Syner-01	NA
DTU_2017_577_1_MG_BF_OU_273.vambbin.16981	Bacteria	Cloacimonadota	Cloacimonadia	Cloacimonadales	Cloacimonadaceae	UBA3900	NA
DTU_2017_577_1_MG_BF_OU_273.vambbin.21	Bacteria	Bacteroidetes	Bacteroidia	Bacteroidales	UBA932	DMER64	DMER64 sp002305545
DTU_2017_577_1_MG_BF_OU_273.vambbin.43	Bacteria	Cloacimonadota	Cloacimonadia	Cloacimonadales	Cloacimonadaceae	Cloacimonas	Cloacimonas sp002432865
DTU_2017_578_1_MG_BF_BO_274.metabin.1	Bacteria	Firmicutes	Clostridia	Peptostreptococcales	Anaerovoracaceae	Mogibacterium	NA
DTU_2017_578_1_MG_BF_BO_274.metabin.29	Bacteria	Bacteroidetes	Bacteroidia	Chitinophagales	Chitinophagaceae	NA	NA
DTU_2017_578_1_MG_BF_BO_274.metabin.63	Bacteria	Actinobacteriota	Acidimicrobiia	NA	NA	NA	NA
DTU_2017_578_1_MG_BF_BO_274.metabin.7	Bacteria	Proteobacteria	Alphaproteobacteria	Rhodospirillales	2-12-FULL-67-15	NA	NA
DTU_2017_578_1_MG_BF_BO_274.metabin.8	Bacteria	Planctomycetota	UBA1135	UBA1135	GCA-002686595	NA	NA
DTU_2017_578_1_MG_BF_BO_274.vambbin.23671	Bacteria	Firmicutes	Bacilli	Lactobacillales	Enterococcaceae	Enterococcus	NA
DTU_2017_580_1_MG_BW_GA_276.metabin.64	Bacteria	Proteobacteria	Gammaproteobacteria	Competibacterales	Competibacteraceae	Contendobacter	NA
DTU_2017_580_1_MG_BW_GA_276.vambbin.18903	Bacteria	Chloroflexota	Anaerolineae	Promineofilales	Promineofilaceae	Promineofilum	NA
DTU_2017_580_1_MG_BW_GA_276.vambbin.5156	Bacteria	Chloroflexota	Anaerolineae	UBA3071	NA	NA	NA
DTU_2017_581_1_MG_MW_ZO_277.vambbin.126218	Bacteria	Proteobacteria	Gammaproteobacteria	Ectothiorhodospirales	Ectothiorhodospiraceae	Thiorhodospira	NA
DTU_2017_581_1_MG_MW_ZO_277.vambbin.290670	Bacteria	Proteobacteria	Alphaproteobacteria	Rickettsiales	Rickettsiaceae	NA	NA
DTU_2017_581_1_MG_MW_ZO_277.vambbin.40031	Bacteria	Proteobacteria	Alphaproteobacteria	Sphingomonadales	Sphingomonadaceae	Porphyrobacter	Porphyrobacter sp001724215
DTU_2017_581_1_MG_MW_ZO_277.vambbin.48310	Bacteria	Proteobacteria	Gammaproteobacteria	Xanthomonadales	Wenzhouxiangellaceae	Wenzhouxiangella	NA
DTU_2017_582_1_MG_MW_CH_278.metabin.69	Bacteria	Cyanobacteria	Cyanobacteriia	Synechococcales	Cyanobiaceae	PCC7001	NA
DTU_2017_583_1_MG_MW_MA_279.metabin.103	Bacteria	Firmicutes	Bacilli	Lactobacillales	Aerococcaceae	Ignavigranum	NA
DTU_2017_583_1_MG_MW_MA_279.metabin.106	Bacteria	Chloroflexota	Anaerolineae	Anaerolineales	Anaerolineaceae	T78	NA
DTU_2017_583_1_MG_MW_MA_279.metabin.28	Bacteria	Firmicutes	Clostridia	Tissierellales	Tissierellaceae	NA	NA
DTU_2017_583_1_MG_MW_MA_279.metabin.52	Bacteria	Synergistota	Synergistia	Synergistales	Dethiosulfovibrionaceae	Dethiosulfovibrio	NA
DTU_2017_583_1_MG_MW_MA_279.metabin.68	Bacteria	Firmicutes	Negativicutes	Acidaminococcales	Acidaminococcaceae	Phascolarctobacterium	Phascolarctobacterium faecium
DTU_2017_583_1_MG_MW_MA_279.metabin.88	Bacteria	Firmicutes	Clostridia	Peptostreptococcales	Anaerovoracaceae	NA	NA
DTU_2017_583_1_MG_MW_MA_279.metabin.98	Bacteria	Firmicutes	Clostridia	Peptostreptococcales	Anaerovoracaceae	UBA5559	NA
DTU_2017_583_1_MG_MW_MA_279.vambbin.141527	Bacteria	Synergistota	Synergistia	Synergistales	Aminiphilaceae	NA	NA
DTU_2017_583_1_MG_MW_MA_279.vambbin.188006	Bacteria	Firmicutes	Bacilli	Erysipelotrichales	Erysipelotrichaceae	MTC7	MTC7 sp001695645
DTU_2017_583_1_MG_MW_MA_279.vambbin.2514	Archaea	Halobacterota	Methanosarcinia	Methanotrichales	Methanotrichaceae	Methanothrix	Methanothrix sp002505805
DTU_2017_583_1_MG_MW_MA_279.vambbin.34258	Bacteria	Firmicutes	Clostridia	Tissierellales	Tissierellaceae	UBA5857	NA
DTU_2017_583_1_MG_MW_MA_279.vambbin.4398	Bacteria	Synergistota	Synergistia	Synergistales	Aminobacteriaceae	Syner-01	Syner-01 sp002425775
DTU_2017_583_1_MG_MW_MA_279.vambbin.504	Bacteria	Proteobacteria	Gammaproteobacteria	Enterobacterales	Pasteurellaceae	Basfia	NA
DTU_2017_583_1_MG_MW_MA_279.vambbin.96114	Bacteria	Desulfobacterota	Desulfovibrionia	Desulfovibrionales	Desulfonatronaceae	Desulfonatronum	NA
DTU_2017_584_1_MG_MW_MC_280.metabin.100	Bacteria	Firmicutes	Negativicutes	Propionisporales	NA	NA	NA
DTU_2017_584_1_MG_MW_MC_280.metabin.10	Bacteria	Firmicutes	Clostridia	Oscillospirales	Oscillospiraceae	UBA2658	NA
DTU_2017_584_1_MG_MW_MC_280.metabin.118	Bacteria	Proteobacteria	Gammaproteobacteria	Chromatiales	Chromatiaceae	NA	NA
DTU_2017_584_1_MG_MW_MC_280.metabin.11	Bacteria	Firmicutes	Clostridia	Oscillospirales	Oscillospiraceae	UBA2922	NA
DTU_2017_584_1_MG_MW_MC_280.metabin.3	Bacteria	Verrucomicrobiota	Kiritimatiellae	LD1-PB3	Lenti-01	Lenti-01	NA
DTU_2017_584_1_MG_MW_MC_280.metabin.49	Bacteria	Proteobacteria	Alphaproteobacteria	Acetobacterales	Acetobacteraceae	Rubritepida	NA
DTU_2017_584_1_MG_MW_MC_280.metabin.56	Bacteria	Proteobacteria	Gammaproteobacteria	Burkholderiales	Burkholderiaceae	Hydrogenophaga	NA
DTU_2017_584_1_MG_MW_MC_280.vambbin.13435	Bacteria	Firmicutes	Clostridia	Oscillospirales	Oscillospiraceae	UBA2658	NA
DTU_2017_584_1_MG_MW_MC_280.vambbin.14973	Bacteria	Proteobacteria	Alphaproteobacteria	Sphingomonadales	Sphingomonadaceae	Porphyrobacter	NA
DTU_2017_584_1_MG_MW_MC_280.vambbin.23300	Bacteria	Proteobacteria	Gammaproteobacteria	Burkholderiales	Rhodocyclaceae	Dechloromonas	NA
DTU_2017_584_1_MG_MW_MC_280.vambbin.292	Bacteria	Proteobacteria	Gammaproteobacteria	Burkholderiales	Rhodocyclaceae	NA	NA
DTU_2017_584_1_MG_MW_MC_280.vambbin.62265	Bacteria	Firmicutes	Clostridia	Oscillospirales	Oscillospiraceae	Ruminiclostridium	NA
DTU_2017_584_1_MG_MW_MC_280.vambbin.72155	Bacteria	Proteobacteria	Gammaproteobacteria	Burkholderiales	Rhodocyclaceae	Dechloromonas	NA
DTU_2017_584_1_MG_MW_MC_280.vambbin.78506	Bacteria	Firmicutes	Clostridia	Christensenellales	CAG-138	UBA7703	NA
DTU_2017_584_1_MG_MW_MC_280.vambbin.8406	Bacteria	Proteobacteria	Alphaproteobacteria	Rhodobacterales	Rhodobacteraceae	Rhodobacter	Rhodobacter capsulatus
DTU_2017_585_1_MG_TG_LO_281.metabin.50	Bacteria	Verrucomicrobiota	Verrucomicrobiae	Chthoniobacterales	NA	NA	NA
DTU_2017_585_1_MG_TG_LO_281.metabin.6	Bacteria	Cyanobacteria	Cyanobacteriia	Synechococcales	Cyanobiaceae	PCC7001	NA
DTU_2017_585_1_MG_TG_LO_281.metabin.79	Bacteria	Proteobacteria	Gammaproteobacteria	Methylococcales	Methylococcaceae	UBA6136	NA
DTU_2017_585_1_MG_TG_LO_281.vambbin.243	Bacteria	Desulfobacterota	Desulfovibrionia	Desulfovibrionales	Desulfovibrionaceae	NA	NA
DTU_2017_586_1_MG_MW_LI_282.metabin.25	Bacteria	Proteobacteria	Gammaproteobacteria	Burkholderiales	Rhodocyclaceae	Thauera	NA
DTU_2017_586_1_MG_MW_LI_282.metabin.9	Bacteria	Verrucomicrobiota	Kiritimatiellae	RFP12	UBA3636	NA	NA
DTU_2017_586_1_MG_MW_LI_282.vambbin.4482	Bacteria	Firmicutes	Clostridia	Christensenellales	CAG-74	Firm-11	NA
DTU_2017_587_1_MG_MW_KA_283.metabin.35	Bacteria	Proteobacteria	Gammaproteobacteria	Burkholderiales	Burkholderiaceae	SCGC-AAA027-K21	NA
DTU_2017_587_1_MG_MW_KA_283.metabin.41	Bacteria	Bacteroidetes	Bacteroidia	Cytophagales	Cyclobacteriaceae	Mariniradius	NA
DTU_2017_587_1_MG_MW_KA_283.metabin.47	Bacteria	Actinobacteriota	Actinobacteria	Actinomycetales	Microbacteriaceae	Rhodoluna	Rhodoluna planktonica
DTU_2017_587_1_MG_MW_KA_283.metabin.54	Bacteria	Proteobacteria	Alphaproteobacteria	Rhodobacterales	Rhodobacteraceae	TH137	TH137 sp000500915
DTU_2017_588_1_MG_MW_NS_284.metabin.42	Bacteria	Proteobacteria	Alphaproteobacteria	Sphingomonadales	Sphingomonadaceae	UBA1936	NA
DTU_2017_588_1_MG_MW_NS_284.metabin.85	Bacteria	Verrucomicrobiota	Verrucomicrobiae	Chthoniobacterales	Chthoniobacteraceae	NA	NA
DTU_2017_588_1_MG_MW_NS_284.metabin.91	Bacteria	Bacteroidetes	Bacteroidia	Chitinophagales	Chitinophagaceae	NA	NA
DTU_2017_588_1_MG_MW_NS_284.metabin.9	Bacteria	Proteobacteria	Gammaproteobacteria	Burkholderiales	Burkholderiaceae	Ramlibacter	NA
DTU_2017_588_1_MG_MW_NS_284.vambbin.24289	Bacteria	Proteobacteria	Alphaproteobacteria	Sphingomonadales	Sphingomonadaceae	Novosphingobium	NA
DTU_2017_589_1_MG_BD_DH_285.metabin.16	Bacteria	Proteobacteria	Gammaproteobacteria	Burkholderiales	Burkholderiaceae	Brachymonas	NA
DTU_2017_589_1_MG_BD_DH_285.metabin.54	Bacteria	Firmicutes	Clostridia	Tissierellales	Tissierellaceae	UBA5857	NA
DTU_2017_589_1_MG_BD_DH_285.vambbin.1088	Bacteria	Firmicutes	Clostridia	Lachnospirales	Lachnospiraceae	UBA1066	UBA1066 sp002316215
DTU_2017_592_1_MG_NP_BH_288.vambbin.4995	Bacteria	Proteobacteria	Gammaproteobacteria	Pseudomonadales	Pseudomonadaceae	Pseudomonas	NA
DTU_2017_594_1_MG_GH_TA_290.metabin.12	Bacteria	Desulfobacterota	Desulfobulbia	Desulfobulbales	Desulfobulbaceae	NA	NA
DTU_2017_594_1_MG_GH_TA_290.metabin.49	Bacteria	Bacteroidetes	Bacteroidia	Bacteroidales	Dysgonomonadaceae	Petrimonas	Petrimonas sp002356435
DTU_2017_594_1_MG_GH_TA_290.vambbin.425	Archaea	Halobacterota	Methanosarcinia	Methanosarcinales	Methanosarcinaceae	Methanosarcina	Methanosarcina mazei
DTU_2017_596_1_MG_GB_EB_292.vambbin.12541	Bacteria	Firmicutes	Negativicutes	Veillonellales	Dialisteraceae	Dialister	NA
DTU_2017_596_1_MG_GB_EB_292.vambbin.93	Bacteria	Firmicutes	Negativicutes	Veillonellales	Megasphaeraceae	Megasphaera	Megasphaera sp000417505
DTU_2017_598_1_MG_CL_SA_294.metabin.14	Bacteria	Proteobacteria	Gammaproteobacteria	Burkholderiales	Burkholderiaceae	Brachymonas	Brachymonas denitrificans
DTU_2017_598_1_MG_CL_SA_294.vambbin.1287	Bacteria	Fusobacteriota	Fusobacteriia	Fusobacteriales	Leptotrichiaceae	Sebaldella	NA
DTU_2017_598_1_MG_CL_SA_294.vambbin.324	Bacteria	Fusobacteriota	Fusobacteriia	Fusobacteriales	Leptotrichiaceae	Sebaldella	Sebaldella termitidis
DTU_2017_599_1_MG_CL_PA_295.vambbin.10952	Bacteria	Firmicutes	Bacilli	Lactobacillales	Lactobacillaceae	Lactobacillus	NA
DTU_2017_599_1_MG_CL_PA_295.vambbin.4960	Bacteria	Proteobacteria	Gammaproteobacteria	Burkholderiales	Burkholderiaceae	Janthinobacterium	Janthinobacterium sp900112025
DTU_2017_601_1_MG_IL_BE_297.metabin.57	Bacteria	Proteobacteria	Gammaproteobacteria	Pseudomonadales	Moraxellaceae	Alkanindiges	NA
DTU_2017_601_1_MG_IL_BE_297.vambbin.1952	Bacteria	Proteobacteria	Gammaproteobacteria	Burkholderiales	Burkholderiaceae	Simplicispira	NA
DTU_2017_601_1_MG_IL_BE_297.vambbin.886	Bacteria	Proteobacteria	Gammaproteobacteria	Pseudomonadales	Pseudomonadaceae	Pseudomonas	NA
DTU_2017_602_1_MG_CA_OT_298.metabin.52	Bacteria	Bacteroidetes	Bacteroidia	Chitinophagales	Saprospiraceae	OLB8	NA
DTU_2017_602_1_MG_CA_OT_298.metabin.80	Bacteria	Actinobacteriota	Actinobacteria	Mycobacteriales	Mycobacteriaceae	Mycolicibacterium	NA
DTU_2017_602_1_MG_CA_OT_298.vambbin.1114	Bacteria	Proteobacteria	Gammaproteobacteria	Competibacterales	Competibacteraceae	NA	NA
DTU_2017_602_1_MG_CA_OT_298.vambbin.12659	Bacteria	Verrucomicrobiota	Verrucomicrobiae	Chthoniobacterales	Terrimicrobiaceae	NA	NA
DTU_2017_604_1_MG_CA_CA_300.vambbin.2870	Bacteria	Synergistota	Synergistia	Synergistales	Thermovirgaceae	58-81	NA
DTU_2017_605_1_MG_CA_VA_301.vambbin.123963	Bacteria	Proteobacteria	Gammaproteobacteria	Pseudomonadales	Pseudomonadaceae	Pseudomonas	NA
DTU_2017_606_1_MG_GH_KU_302.metabin.44	Bacteria	Bacteroidetes	Bacteroidia	Bacteroidales	Dysgonomonadaceae	NA	NA
DTU_2017_606_1_MG_GH_KU_302.metabin.63	Bacteria	Firmicutes	Clostridia	Oscillospirales	Ruminococcaceae	NA	NA
DTU_2017_606_1_MG_GH_KU_302.vambbin.1367	Bacteria	Proteobacteria	Gammaproteobacteria	Burkholderiales	Burkholderiaceae	Comamonas	NA
DTU_2017_606_1_MG_GH_KU_302.vambbin.26173	Bacteria	Bacteroidetes	Bacteroidia	Bacteroidales	Dysgonomonadaceae	Dysgonomonas	NA
DTU_2017_606_1_MG_GH_KU_302.vambbin.268322	Bacteria	Firmicutes	Bacilli	Erysipelotrichales	Erysipelotrichaceae	UBA2212	NA
DTU_2017_606_1_MG_GH_KU_302.vambbin.99657	Bacteria	Bacteroidetes	Bacteroidia	Bacteroidales	Paludibacteraceae	NA	NA
DTU_2017_607_1_MG_GB_NC_303.vambbin.19670	Bacteria	Proteobacteria	Gammaproteobacteria	Burkholderiales	Burkholderiaceae	Rhodoferax	NA
DTU_2017_607_1_MG_GB_NC_303.vambbin.32	Bacteria	Proteobacteria	Gammaproteobacteria	Burkholderiales	Aquaspirillaceae	NA	NA
DTU_2017_607_1_MG_GB_NC_303.vambbin.58541	Bacteria	Proteobacteria	Alphaproteobacteria	Sphingomonadales	Sphingomonadaceae	Novosphingobium	NA
DTU_2017_607_1_MG_GB_NC_303.vambbin.7038	Bacteria	Proteobacteria	Gammaproteobacteria	Xanthomonadales	Xanthomonadaceae	Aquimonas	NA
DTU_2017_607_1_MG_GB_NC_303.vambbin.91814	Bacteria	Bacteroidetes	Bacteroidia	Sphingobacteriales	Sphingobacteriaceae	Pedobacter	NA
DTU_2017_608_1_MG_FI_OU_304.metabin.10	Bacteria	Proteobacteria	Gammaproteobacteria	Xanthomonadales	Xanthomonadaceae	Thermomonas	NA
DTU_2017_608_1_MG_FI_OU_304.metabin.71	Bacteria	Bacteroidetes	Bacteroidia	Chitinophagales	Saprospiraceae	NA	NA
DTU_2017_608_1_MG_FI_OU_304.vambbin.2149	Bacteria	Actinobacteriota	Acidimicrobiia	Microtrichales	Microtrichaceae	IMCC26207	NA
DTU_2017_609_1_MG_FI_TU_305.metabin.15	Archaea	Euryarchaeota	Methanobacteria	Methanobacteriales	NA	NA	NA
DTU_2017_609_1_MG_FI_TU_305.metabin.78	Bacteria	Caldatribacteriota	Caldatribacteriia	Caldatribacteriales	Caldatribacteriaceae	UBA3950	UBA3950 sp002385475
DTU_2017_610_1_MG_FI_HE_306.metabin.13	Bacteria	Actinobacteriota	Actinobacteria	Propionibacteriales	Propionibacteriaceae	Propionicimonas	Propionicimonas sp001603275
DTU_2017_612_1_MG_AE_AD_308.metabin.33	Archaea	Halobacterota	Methanosarcinia	Methanotrichales	Methanotrichaceae	Methanothrix	Methanothrix soehngenii
DTU_2017_613_1_MG_NZ_CH_309.metabin.14	Bacteria	Proteobacteria	Gammaproteobacteria	Xanthomonadales	Xanthomonadaceae	Thermomonas	NA
DTU_2017_613_1_MG_NZ_CH_309.metabin.68	Bacteria	Chloroflexota	Anaerolineae	Promineofilales	Promineofilaceae	Promineofilum	NA
DTU_2017_613_1_MG_NZ_CH_309.metabin.72	Bacteria	Proteobacteria	Alphaproteobacteria	Rhizobiales	Anderseniellaceae	QKVK01	NA
DTU_2017_613_1_MG_NZ_CH_309.vambbin.28396	Bacteria	Firmicutes	Negativicutes	Veillonellales	Veillonellaceae	NA	NA
DTU_2017_613_1_MG_NZ_CH_309.vambbin.34653	Bacteria	Chloroflexota	Anaerolineae	NA	NA	NA	NA
DTU_2017_614_1_MG_US_HO_310.vambbin.27088	Bacteria	Campylobacterota	Campylobacteria	Campylobacterales	Sulfurimonadaceae	Sulfurimonas	NA
DTU_2017_615_1_MG_US_AU_311.metabin.12	Bacteria	Proteobacteria	Gammaproteobacteria	Burkholderiales	Burkholderiaceae	Rubrivivax	NA
DTU_2017_615_1_MG_US_AU_311.metabin.43	Bacteria	Proteobacteria	Alphaproteobacteria	Sphingomonadales	Sphingomonadaceae	NA	NA
DTU_2017_615_1_MG_US_AU_311.metabin.4	Bacteria	Bacteroidetes	Bacteroidia	Chitinophagales	Chitinophagaceae	JJ008	NA
DTU_2017_615_1_MG_US_AU_311.metabin.60	Bacteria	Proteobacteria	Alphaproteobacteria	Rhizobiales	Beijerinckiaceae	Rhodoblastus	NA
DTU_2017_615_1_MG_US_AU_311.vambbin.1890	Bacteria	Proteobacteria	Alphaproteobacteria	Reyranellales	Reyranellaceae	Reyranella	NA
DTU_2017_615_1_MG_US_AU_311.vambbin.9461	Bacteria	Proteobacteria	Alphaproteobacteria	Reyranellales	Reyranellaceae	Reyranella	Reyranella massiliensis
DTU_2017_616_1_MG_US_WA_312.metabin.35	Bacteria	Proteobacteria	Gammaproteobacteria	Burkholderiales	Rhodocyclaceae	Thauera	Thauera aminoaromatica
DTU_2017_616_1_MG_US_WA_312.vambbin.416	Bacteria	Firmicutes	Bacilli	Lactobacillales	Streptococcaceae	Lactococcus	Lactococcus chungangensis
DTU_2017_616_1_MG_US_WA_312.vambbin.730	Bacteria	Proteobacteria	Gammaproteobacteria	Burkholderiales	Burkholderiaceae	Brachymonas	NA
DTU_2017_617_1_MG_MY_AS_313.vambbin.539	Bacteria	Proteobacteria	Gammaproteobacteria	Pseudomonadales	Pseudomonadaceae	Pseudomonas	Pseudomonas
DTU_2017_619_1_MG_MY_PB_315.vambbin.42524	Bacteria	Proteobacteria	Alphaproteobacteria	Sphingomonadales	Sphingomonadaceae	Novosphingobium	NA
DTU_2017_620_1_MG_TZ_MS_316.metabin.43	Bacteria	Proteobacteria	Gammaproteobacteria	Pseudomonadales	Pseudomonadaceae	Pseudomonas	NA
DTU_2017_620_1_MG_TZ_MS_316.vambbin.10205	Bacteria	Firmicutes	Bacilli	Erysipelotrichales	Erysipelotrichaceae	NA	NA
DTU_2017_620_1_MG_TZ_MS_316.vambbin.1665	Bacteria	Proteobacteria	Gammaproteobacteria	Burkholderiales	Neisseriaceae	Neisseria	NA
DTU_2017_620_1_MG_TZ_MS_316.vambbin.42473	Bacteria	Campylobacterota	Campylobacteria	Campylobacterales	Sulfurospirillaceae	Sulfurospirillum	Sulfurospirillum sp002162315
DTU_2017_620_1_MG_TZ_MS_316.vambbin.5276	Bacteria	Firmicutes	Clostridia	Peptostreptococcales	Filifactoraceae	Proteocatella	NA
DTU_2017_620_1_MG_TZ_MS_316.vambbin.856	Bacteria	Firmicutes	Negativicutes	Acidaminococcales	Acidaminococcaceae	NA	NA
DTU_2017_621_1_MG_PH_QU_317.vambbin.53137	Bacteria	Firmicutes	Clostridia	Oscillospirales	Ruminococcaceae	Ruthenibacterium	NA
DTU_2017_621_1_MG_PH_QU_317.vambbin.56293	Bacteria	Actinobacteriota	Actinobacteria	Nanopelagicales	GCA-2699445	NA	NA
DTU_2017_623_1_MG_LC_CA_319.metabin.28	Bacteria	Firmicutes	Clostridia	Christensenellales	CAG-74	NA	NA
DTU_2017_624_1_MG_LC_GR_320.vambbin.14699	Bacteria	Proteobacteria	Gammaproteobacteria	Thiotrichales	Thiotrichaceae	NA	NA
DTU_2017_626_1_MG_NG_IL_322.metabin.100	Bacteria	Firmicutes	Clostridia	Christensenellales	CAG-138	NA	NA
DTU_2017_626_1_MG_NG_IL_322.metabin.108	Bacteria	Planctomycetota	Planctomycetes	Pirellulales	Thermoguttaceae	RUG695	NA
DTU_2017_626_1_MG_NG_IL_322.metabin.112	Bacteria	Planctomycetota	Planctomycetes	Pirellulales	Thermoguttaceae	RUG695	NA
DTU_2017_626_1_MG_NG_IL_322.metabin.39	Bacteria	Verrucomicrobiota	Kiritimatiellae	LD1-PB3	Lenti-01	Lenti-01	NA
DTU_2017_626_1_MG_NG_IL_322.metabin.86	Archaea	Halobacterota	Methanomicrobia	Methanomicrobiales	Methanosphaerulaceae	NA	NA
DTU_2017_626_1_MG_NG_IL_322.vambbin.153819	Bacteria	Firmicutes	Clostridia	Christensenellales	CAG-74	DTU024	NA
DTU_2017_626_1_MG_NG_IL_322.vambbin.2698	Bacteria	Firmicutes	Clostridia	Tissierellales	Sedimentibacteraceae	Sedimentibacter	NA
DTU_2017_626_1_MG_NG_IL_322.vambbin.27402	Bacteria	Firmicutes	Clostridia	Christensenellales	CAG-138	NA	NA
DTU_2017_626_1_MG_NG_IL_322.vambbin.27484	Bacteria	Firmicutes	Clostridia	Christensenellales	CAG-138	UBA7703	NA
DTU_2017_629_1_MG_IR_TH_325.metabin.23	Bacteria	Bacteroidetes	Bacteroidia	Chitinophagales	Saprospiraceae	UBA3362	NA
DTU_2017_629_1_MG_IR_TH_325.vambbin.60230	Bacteria	Proteobacteria	Alphaproteobacteria	Rhizobiales	Hyphomicrobiaceae	Hyphomicrobium	NA
DTU_2017_630_1_MG_SN_DA_326.vambbin.74	Bacteria	Proteobacteria	Gammaproteobacteria	Burkholderiales	Burkholderiaceae	NA	NA
DTU_2017_630_1_MG_SN_DA_326.vambbin.8268	Bacteria	Proteobacteria	Gammaproteobacteria	Chromatiales	Chromatiaceae	Thiosymbion	NA
DTU_2017_634_1_MG_CN_GU_330.vambbin.9387	Bacteria	Proteobacteria	Alphaproteobacteria	Rhodobacterales	Rhodobacteraceae	QY30	NA
DTU_2017_635_1_MG_VN_HO_331.metabin.55	Bacteria	Bacteroidetes	Bacteroidia	Bacteroidales	Bacteroidaceae	Prevotella	NA
DTU_2017_635_1_MG_VN_HO_331.metabin.56	Bacteria	Campylobacterota	Campylobacteria	Campylobacterales	Arcobacteraceae	NA	NA
DTU_2017_636_1_MG_RS_BE_332.metabin.88	Bacteria	Firmicutes	Negativicutes	NA	NA	NA	NA
DTU_2017_636_1_MG_RS_BE_332.vambbin.43629	Bacteria	Proteobacteria	Gammaproteobacteria	Burkholderiales	Rhodocyclaceae	Dechloromonas	NA
DTU_2017_637_1_MG_NL_UT_333.metabin.14	Bacteria	Bacteroidetes	Bacteroidia	Flavobacteriales	Weeksellaceae	Chryseobacterium	NA
DTU_2017_637_1_MG_NL_UT_333.vambbin.10571	Bacteria	Proteobacteria	Gammaproteobacteria	Pseudomonadales	Moraxellaceae	Psychrobacter	NA
DTU_2017_959_1_MG_AU1707_L1.vambbin.8726	Bacteria	Actinobacteriota	Actinobacteria	Actinomycetales	Microbacteriaceae	UBA3913	UBA3913 sp002391425
DTU_2017_960_1_MG_AU1708_L2.metabin.45	Bacteria	Proteobacteria	Alphaproteobacteria	Sphingomonadales	Sphingomonadaceae	Ga0077559	NA
DTU_2017_960_1_MG_AU1708_L2.metabin.67	Bacteria	Bacteroidetes	Bacteroidia	Flavobacteriales	PHOS-HE28	PHOS-HE28	NA
DTU_2017_960_1_MG_AU1708_L2.vambbin.4704	Bacteria	Proteobacteria	Gammaproteobacteria	Burkholderiales	Rhodocyclaceae	Dechloromonas	NA
DTU_2017_960_1_MG_AU1708_L2.vambbin.647	Bacteria	Synergistota	Synergistia	Synergistales	Synergistaceae	NA	NA
DTU_2017_960_1_MG_AU1708_L2.vambbin.71	Bacteria	Synergistota	Synergistia	Synergistales	Synergistaceae	Syner-03	Syner-03 sp002839185
DTU_2017_961_1_MG_PK1708_L3.metabin.28	Bacteria	Synergistota	Synergistia	Synergistales	Aminobacteriaceae	NA	NA
DTU_2017_962_1_MG_PK1707_L4.vambbin.1669	Bacteria	Proteobacteria	Gammaproteobacteria	Enterobacterales	Enterobacteriaceae	Rahnella	Rahnella sp001422575
DTU_2017_963_1_MG_GR1707_L5.vambbin.8722	Bacteria	Bacteroidetes	Bacteroidia	Flavobacteriales	Weeksellaceae	Chryseobacterium	NA
DTU_2017_965_1_MG_MY1707_L8.metabin.23	Bacteria	Firmicutes	Negativicutes	Selenomonadales	Selenomonadaceae	NA	NA
DTU_2017_967_1_MG_MY1709_L10.vambbin.34350	Bacteria	Cyanobacteria	Cyanobacteriia	Cyanobacteriales	Phormidiaceae	Microcoleus	Microcoleus nigroviridis
DTU_2017_971_1_MG_CN1709_L14.vambbin.10206	Bacteria	Desulfuromonadota	Desulfuromonadia	Geobacterales	Pelobacteraceae	NA	NA
DTU_2017_974_1_MG_PK1710_L19.metabin.34	Bacteria	Synergistota	Synergistia	Synergistales	Aminobacteriaceae	Syner-01	NA
DTU_2017_975_1_MG_AU1709_L20.metabin.45	Bacteria	Proteobacteria	Gammaproteobacteria	Burkholderiales	Rhodocyclaceae	Propionivibrio	NA
DTU_2017_975_1_MG_AU1709_L20.metabin.60	Bacteria	Firmicutes	Clostridia	Oscillospirales	Ruminococcaceae	Gemmiger	Gemmiger sp003476825
DTU_2017_975_1_MG_AU1709_L20.vambbin.16160	Bacteria	Firmicutes	Negativicutes	Selenomonadales	Selenomonadaceae	NA	NA
DTU_2017_975_1_MG_AU1709_L20.vambbin.195	Bacteria	Proteobacteria	Gammaproteobacteria	Pseudomonadales	Moraxellaceae	Moraxella	NA
DTU_2017_975_1_MG_AU1709_L20.vambbin.431565	Bacteria	Proteobacteria	Gammaproteobacteria	Xanthomonadales	Rhodanobacteraceae	Dokdonella	NA
DTU_2017_977_1_MG_CM1710_L22.metabin.16	Archaea	Halobacterota	Methanomicrobia	Methanomicrobiales	Methanosphaerulaceae	NA	NA
DTU_2017_977_1_MG_CM1710_L22.metabin.57	Bacteria	Firmicutes	Clostridia	Lachnospirales	Lachnospiraceae	Bacteroides	Bacteroides
DTU_2017_977_1_MG_CM1710_L22.vambbin.21011	Bacteria	Firmicutes	Negativicutes	Veillonellales	Veillonellaceae	Veillonella	Veillonella
DTU_2017_977_1_MG_CM1710_L22.vambbin.59	Bacteria	Firmicutes	Clostridia	Eubacteriales	Eubacteriaceae	UBA7485	NA
DTU_2017_980_1_MG_CM1707_L25.vambbin.8782	Bacteria	Firmicutes	Clostridia	Lachnospirales	Lachnospiraceae	NK4A144	NA
DTU_2017_981_1_MG_CM1708_L26.vambbin.15222	Bacteria	Firmicutes	Clostridia	Lachnospirales	Lachnospiraceae	NA	NA
DTU_2017_982_1_MG_CM1709_L27.vambbin.973	Bacteria	Firmicutes	Negativicutes	Veillonellales	Dialisteraceae	Dialister	NA
DTU_2017_983_1_MG_US1709_L28.metabin.20	Bacteria	Proteobacteria	Alphaproteobacteria	Sphingomonadales	Sphingomonadaceae	Porphyrobacter	NA
DTU_2017_983_1_MG_US1709_L28.metabin.71	Bacteria	Proteobacteria	Gammaproteobacteria	Enterobacterales	Enterobacteriaceae	Klebsiella	Klebsiella
DTU_2017_983_1_MG_US1709_L28.metabin.95	Bacteria	Proteobacteria	Gammaproteobacteria	Xanthomonadales	Xanthomonadaceae	Aquimonas	NA
DTU_2017_983_1_MG_US1709_L28.vambbin.45513	Bacteria	Proteobacteria	Alphaproteobacteria	Sphingomonadales	Sphingomonadaceae	Sandarakinorhabdus	NA
DTU_2017_984_1_MG_US1710_L29.vambbin.1471	Bacteria	Bacteroidetes	Bacteroidia	Flavobacteriales	Weeksellaceae	Cloacibacterium	NA
DTU_2017_984_1_MG_US1710_L29.vambbin.637	Bacteria	Bacteroidetes	Bacteroidia	Flavobacteriales	Flavobacteriaceae	Flavobacterium	NA
DTU_2017_991_1_MG_CA1708_L36.metabin.42	Bacteria	Proteobacteria	Alphaproteobacteria	Caulobacterales	Caulobacteraceae	Brevundimonas	NA
DTU_2017_991_1_MG_CA1708_L36.vambbin.21859	Bacteria	Proteobacteria	Gammaproteobacteria	Burkholderiales	Rhodocyclaceae	Thauera	NA
DTU_2018_1000_1_MG_AU1802_L45.vambbin.1400	Bacteria	Proteobacteria	Gammaproteobacteria	Pseudomonadales	Moraxellaceae	Acinetobacter	Acinetobacter harbinensis
DTU_2018_1003_1_MG_CN1802_L48.metabin.43	Bacteria	Bacteroidetes	Bacteroidia	Chitinophagales	Saprospiraceae	NA	NA
DTU_2018_1003_1_MG_CN1802_L48.vambbin.39830	Bacteria	Armatimonadota	Fimbriimonadia	Fimbriimonadales	Fimbriimonadaceae	UBA2391	NA
DTU_2018_1006_1_MG_US1801_L55.vambbin.5940	Bacteria	Proteobacteria	Gammaproteobacteria	Pseudomonadales	Moraxellaceae	Acinetobacter	NA
DTU_2018_1007_1_MG_US1802_L56.metabin.53	Bacteria	Proteobacteria	Gammaproteobacteria	Burkholderiales	Burkholderiaceae	NA	NA
DTU_2018_1009_1_MG_AU1803_L58.metabin.32	Bacteria	Proteobacteria	Gammaproteobacteria	Burkholderiales	Burkholderiaceae	Comamonas	NA
DTU_2018_1009_1_MG_AU1803_L58.vambbin.618	Bacteria	Proteobacteria	Gammaproteobacteria	Pseudomonadales	Pseudomonadaceae	Pseudomonas	Pseudomonas
DTU_2018_1010_1_MG_AU1804_L59.vambbin.15816	Bacteria	Proteobacteria	Gammaproteobacteria	Pseudomonadales	Moraxellaceae	Acinetobacter	Acinetobacter sp003024515
DTU_2018_1010_1_MG_AU1804_L59.vambbin.18389	Bacteria	Proteobacteria	Gammaproteobacteria	Burkholderiales	Burkholderiaceae	Comamonas	Comamonas
DTU_2018_1010_1_MG_AU1804_L59.vambbin.5139	Bacteria	Proteobacteria	Gammaproteobacteria	Enterobacterales	Aeromonadaceae	Aeromonas	Aeromonas media
DTU_2018_1011_1_MG_AU1805_L60.vambbin.3606	Bacteria	Chloroflexota	Anaerolineae	Anaerolineales	Anaerolineaceae	T78	NA
DTU_2018_1014_1_MG_MY1805_L63.vambbin.10611	Bacteria	Proteobacteria	Gammaproteobacteria	Burkholderiales	Burkholderiaceae	NA	NA
DTU_2018_1017_1_MG_US1807_L68.metabin.77	Bacteria	Hydrogenedentota	Hydrogenedentia	Hydrogenedentiales	UBA2224	UBA2224	NA
DTU_2018_1017_1_MG_US1807_L68.vambbin.575	Bacteria	Actinobacteriota	Actinobacteria	Mycobacteriales	Mycobacteriaceae	Mycolicibacterium	NA
DTU_2018_1018_1_MG_US1808_L69.metabin.72	Bacteria	Proteobacteria	Alphaproteobacteria	Caulobacterales	Caulobacteraceae	Brevundimonas	NA
DTU_2018_1019_1_MG_AU1807_L70.vambbin.3743	Bacteria	Proteobacteria	Gammaproteobacteria	Pseudomonadales	Moraxellaceae	Psychrobacter	NA
DTU_2018_1023_1_MG_CA1803_L74.vambbin.25498	Bacteria	Proteobacteria	Gammaproteobacteria	Burkholderiales	Methylophilaceae	Methylotenera	NA
DTU_2018_1024_1_MG_CA1804_L75.metabin.62	Bacteria	Proteobacteria	Alphaproteobacteria	Caulobacterales	Caulobacteraceae	Brevundimonas	NA
DTU_2018_1024_1_MG_CA1804_L75.metabin.64	Bacteria	Proteobacteria	Alphaproteobacteria	Rhodobacterales	Rhodobacteraceae	Rhodobacter	NA
DTU_2018_1024_1_MG_CA1804_L75.vambbin.10985	Bacteria	Proteobacteria	Gammaproteobacteria	Burkholderiales	Burkholderiaceae	UBA2121	NA
DTU_2018_1024_1_MG_CA1804_L75.vambbin.41	Bacteria	Proteobacteria	Alphaproteobacteria	Sphingomonadales	Sphingomonadaceae	Novosphingobium	NA
DTU_2018_1024_1_MG_CA1804_L75.vambbin.673	Bacteria	Proteobacteria	Gammaproteobacteria	Pseudomonadales	Pseudomonadaceae	Pseudomonas	Pseudomonas
DTU_2018_1025_1_MG_CA1805_L76.metabin.57	Bacteria	Proteobacteria	Gammaproteobacteria	Burkholderiales	Burkholderiaceae	SCGC-AAA027-K21	NA
DTU_2018_1025_1_MG_CA1805_L76.metabin.60	Bacteria	Proteobacteria	Alphaproteobacteria	Geminicoccales	Geminicoccaceae	NA	NA
DTU_2018_1025_1_MG_CA1805_L76.vambbin.7902	Bacteria	Proteobacteria	Gammaproteobacteria	Xanthomonadales	Xanthomonadaceae	Xanthomonas	NA
DTU_2018_1027_1_MG_CA1808_L78.metabin.57	Bacteria	Proteobacteria	Gammaproteobacteria	Burkholderiales	Burkholderiaceae	SCGC-AAA027-K21	NA
DTU_2018_1028_1_MG_CA1809_L79.metabin.52	Bacteria	Campylobacterota	Campylobacteria	Campylobacterales	Sulfurimonadaceae	Sulfuricurvum	Sulfuricurvum sp002327465
DTU_2018_1028_1_MG_CA1809_L79.metabin.5	Bacteria	Firmicutes	Negativicutes	Acidaminococcales	Acidaminococcaceae	NA	NA
DTU_2018_1029_1_MG_EC1803_L80.vambbin.853	Bacteria	Proteobacteria	Gammaproteobacteria	Burkholderiales	Neisseriaceae	Neisseria	NA
DTU_2018_1036_1_MG_CN1808_L87.vambbin.225	Bacteria	Acidobacteriota	Blastocatellia	Pyrinomonadales	Pyrinomonadaceae	OLB17	NA
DTU_2018_1037_1_MG_CN1809_L88.metabin.29	Bacteria	Proteobacteria	Gammaproteobacteria	Burkholderiales	Palsa-1005	PALSA-1003	NA
DTU_2018_1037_1_MG_CN1809_L88.vambbin.506	Bacteria	Acidobacteriota	Blastocatellia	Pyrinomonadales	Pyrinomonadaceae	OLB17	NA
DTU_2018_1037_1_MG_CN1809_L88.vambbin.5821	Bacteria	Bacteroidetes	Bacteroidia	Chitinophagales	Saprospiraceae	UBA3362	NA
DTU_2018_1038_1_MG_CN1810_L89.metabin.38	Bacteria	Bacteroidetes	Bacteroidia	Flavobacteriales	PHOS-HE28	PHOS-HE28	NA
DTU_2018_1038_1_MG_CN1810_L89.metabin.48	Bacteria	Armatimonadota	Fimbriimonadia	Fimbriimonadales	Fimbriimonadaceae	NA	NA
DTU_2018_1042_1_MG_CM1803_L99.vambbin.18454	Bacteria	Firmicutes	Bacilli	Lactobacillales	Streptococcaceae	Streptococcus	NA
DTU_2018_1046_1_MG_HO_1.metabin.28	Bacteria	Proteobacteria	Gammaproteobacteria	Enterobacterales	Enterobacteriaceae	Leclercia	Leclercia adecarboxylata
DTU_2018_1047_1_MG_HO_2.metabin.33	Bacteria	Firmicutes	Negativicutes	Acidaminococcales	Succinispiraceae	NA	NA
DTU_2018_1048_1_MG_HO_3.metabin.84	Bacteria	Firmicutes	Clostridia	Christensenellales	CAG-74	UBA4246	NA
DTU_2018_1051_1_MG_HO_6.metabin.154	Bacteria	Proteobacteria	Alphaproteobacteria	Rhodobacterales	Rhodobacteraceae	Paracoccus	NA
DTU_2018_1051_1_MG_HO_6.metabin.89	Bacteria	Firmicutes	Clostridia	Oscillospirales	Oscillospiraceae	UBA2922	NA
DTU_2018_1054_1_MG_HU_1.vambbin.1035	Bacteria	Proteobacteria	Gammaproteobacteria	Xanthomonadales	Xanthomonadaceae	NA	NA
DTU_2018_1055_1_MG_HU_2.vambbin.59234	Bacteria	Bacteroidetes	Bacteroidia	AKYH767-A	OLB10	OLB10	NA
DTU_2018_1057_1_MG_HU_4.metabin.82	Bacteria	Acidobacteriota	Blastocatellia	Pyrinomonadales	Pyrinomonadaceae	OLB17	NA
DTU_2018_1057_1_MG_HU_4.vambbin.373	Bacteria	Proteobacteria	Gammaproteobacteria	Burkholderiales	Burkholderiaceae	NA	NA
DTU_2018_1059_1_MG_CN_GW_1.vambbin.603	Bacteria	Actinobacteriota	Actinobacteria	Actinomycetales	Dermatophilaceae	GCA-2748155	NA
DTU_2018_1060_1_MG_CN_GW_2.vambbin.353	Bacteria	Proteobacteria	Gammaproteobacteria	Burkholderiales	Burkholderiaceae	Ottowia	Ottowia sp001897615
DTU_2018_1064_1_MG_TZ_MO_2.vambbin.15356	Bacteria	Firmicutes	Clostridia	Lachnospirales	Lachnospiraceae	UBA1066	NA
DTU_2018_1065_1_MG_TZ_MO_3.metabin.50	Bacteria	Fusobacteriota	Fusobacteriia	Fusobacteriales	Leptotrichiaceae	NA	NA
DTU_2018_1065_1_MG_TZ_MO_3.vambbin.116	Bacteria	Desulfobacterota	Desulfobulbia	Desulfobulbales	Desulfobulbaceae	ORNL	NA
DTU_2018_1067_1_MG_TZ_MO_5.metabin.61	Bacteria	Actinobacteriota	Coriobacteriia	Coriobacteriales	Atopobiaceae	RUG001	NA
DTU_2018_1068_1_MG_TZ_MO_6.metabin.89	Bacteria	Firmicutes	Clostridia	Lachnospirales	Lachnospiraceae	Butyrivibrio	NA
DTU_2018_1068_1_MG_TZ_MO_6.metabin.94	Bacteria	Firmicutes	Bacilli	Lactobacillales	Streptococcaceae	Streptococcus	Streptococcus infantarius
DTU_2018_1068_1_MG_TZ_MO_6.vambbin.60569	Bacteria	Firmicutes	Negativicutes	Selenomonadales	Selenomonadaceae	NA	NA
DTU_2018_1068_1_MG_TZ_MO_6.vambbin.6573	Bacteria	Proteobacteria	Gammaproteobacteria	Burkholderiales	Rhodocyclaceae	Propionivibrio	NA
DTU_2018_1068_1_MG_TZ_MO_6.vambbin.735	Bacteria	Firmicutes	Negativicutes	Acidaminococcales	Acidaminococcaceae	NA	NA
DTU_2018_1069_1_MG_TZ_MO_7.vambbin.4781	Bacteria	Proteobacteria	Gammaproteobacteria	Pseudomonadales	Pseudomonadaceae	Pseudomonas	NA
DTU_2018_1070_1_MG_TZ_MO_8.metabin.45	Bacteria	Firmicutes	Bacilli	Erysipelotrichales	Erysipelotrichaceae	Solobacterium	Solobacterium sp900343155
DTU_2018_1070_1_MG_TZ_MO_8.metabin.80	Bacteria	Proteobacteria	Gammaproteobacteria	Burkholderiales	Rhodocyclaceae	Propionivibrio	NA
DTU_2018_1071_1_MG_TZ_MO_9.vambbin.749	Bacteria	Proteobacteria	Gammaproteobacteria	Enterobacterales	Enterobacteriaceae	Rahnella	Rahnella sp003263515
DTU_2018_646_1_MG_SG_JU_334.vambbin.73972	Bacteria	Proteobacteria	Gammaproteobacteria	Pseudomonadales	Moraxellaceae	Acinetobacter	NA
DTU_2018_647_1_MG_DK_AV_335.vambbin.329	Bacteria	Firmicutes	Bacilli	Lactobacillales	Streptococcaceae	Streptococcus	Streptococcus thermophilus
DTU_2018_648_1_MG_DK_VA_336.vambbin.125777	Bacteria	Firmicutes	Clostridia	Lachnospirales	Lachnospiraceae	NA	NA
DTU_2018_648_1_MG_DK_VA_336.vambbin.201	Bacteria	Firmicutes	Negativicutes	NA	NA	NA	NA
DTU_2018_649_1_MG_DK_AM_337.vambbin.2940	Bacteria	Proteobacteria	Gammaproteobacteria	Pseudomonadales	Moraxellaceae	Psychrobacter	Psychrobacter sp002352555
DTU_2018_649_1_MG_DK_AM_337.vambbin.31583	Bacteria	Proteobacteria	Gammaproteobacteria	Burkholderiales	Neisseriaceae	NA	NA
DTU_2018_650_1_MG_SE_GO_338.vambbin.29374	Bacteria	Proteobacteria	Gammaproteobacteria	Burkholderiales	Methylophilaceae	Novimethylophilus	NA
DTU_2018_651_1_MG_SE_UP_339.metabin.45	Bacteria	Bacteroidetes	Bacteroidia	Bacteroidales	Marinilabiliaceae	NA	NA
DTU_2018_651_1_MG_SE_UP_339.metabin.74	Bacteria	Bacteroidetes	Bacteroidia	Cytophagales	Spirosomaceae	Leadbetterella	Leadbetterella byssophila
DTU_2018_651_1_MG_SE_UP_339.metabin.76	Bacteria	Bacteroidetes	Bacteroidia	Bacteroidales	Prolixibacteraceae	Draconibacterium	NA
DTU_2018_651_1_MG_SE_UP_339.metabin.84	Bacteria	Bacteroidetes	Bacteroidia	Chitinophagales	Chitinophagaceae	UBA3961	NA
DTU_2018_651_1_MG_SE_UP_339.metabin.92	Bacteria	Proteobacteria	Gammaproteobacteria	Xanthomonadales	Xanthomonadaceae	Xanthomonas	NA
DTU_2018_651_1_MG_SE_UP_339.vambbin.12546	Bacteria	Bacteroidetes	Bacteroidia	Flavobacteriales	Weeksellaceae	UBA7623	UBA7623 sp002484105
DTU_2018_651_1_MG_SE_UP_339.vambbin.12785	Bacteria	Proteobacteria	Alphaproteobacteria	Rhizobiales	Rhizobiaceae	QFOR01	QFOR01 sp003248545
DTU_2018_651_1_MG_SE_UP_339.vambbin.27692	Bacteria	Proteobacteria	Gammaproteobacteria	Xanthomonadales	Xanthomonadaceae	NA	NA
DTU_2018_651_1_MG_SE_UP_339.vambbin.30027	Bacteria	Planctomycetota	Phycisphaerae	Phycisphaerales	SM1A02	UBA6054	NA
DTU_2018_651_1_MG_SE_UP_339.vambbin.65574	Bacteria	Bacteroidetes	Bacteroidia	Flavobacteriales	Flavobacteriaceae	NA	NA
DTU_2018_651_1_MG_SE_UP_339.vambbin.9513	Bacteria	Proteobacteria	Alphaproteobacteria	Dongiales	Dongiaceae	NA	NA
DTU_2018_652_1_MG_GR_AT_340.vambbin.51035	Bacteria	Verrucomicrobiota	Kiritimatiellae	LD1-PB3	Lenti-01	NA	NA
DTU_2018_653_1_MG_KH_PP_341.vambbin.4043	Bacteria	Desulfobacterota	Syntrophorhabdia	Syntrophorhabdales	NA	NA	NA
DTU_2018_653_1_MG_KH_PP_341.vambbin.7913	Bacteria	Desulfobacterota	Syntrophorhabdia	Syntrophorhabdales	Syntrophorhabdaceae	Delta-02	NA
DTU_2018_654_1_MG_ES_BA_342.metabin.18	Bacteria	Firmicutes	Negativicutes	Selenomonadales	Selenomonadaceae	NA	NA
DTU_2018_654_1_MG_ES_BA_342.metabin.34	Bacteria	Actinobacteriota	Actinobacteria	Mycobacteriales	Mycobacteriaceae	Gordonia	NA
DTU_2018_654_1_MG_ES_BA_342.metabin.35	Bacteria	Proteobacteria	Gammaproteobacteria	Xanthomonadales	Xanthomonadaceae	NA	NA
DTU_2018_654_1_MG_ES_BA_342.metabin.74	Bacteria	Actinobacteriota	Acidimicrobiia	Microtrichales	Microtrichaceae	IMCC26207	NA
DTU_2018_654_1_MG_ES_BA_342.vambbin.15566	Bacteria	Firmicutes	Negativicutes	Acidaminococcales	Acidaminococcaceae	NA	NA
DTU_2018_654_1_MG_ES_BA_342.vambbin.28703	Bacteria	Firmicutes	Clostridia	Oscillospirales	Ruminococcaceae	Faecalibacterium	NA
DTU_2018_655_1_MG_BE_OS_343.vambbin.11827	Bacteria	Proteobacteria	Gammaproteobacteria	Xanthomonadales	Xanthomonadaceae	Lysobacter	NA
DTU_2018_656_1_MG_BE_LE_344.metabin.37	Bacteria	Bacteroidetes	Bacteroidia	Chitinophagales	Chitinophagaceae	Ferruginibacter	Ferruginibacter sp002381005
DTU_2018_656_1_MG_BE_LE_344.vambbin.10021	Bacteria	Proteobacteria	Gammaproteobacteria	Burkholderiales	Burkholderiaceae	Ottowia	NA
DTU_2018_656_1_MG_BE_LE_344.vambbin.2971	Bacteria	Proteobacteria	Gammaproteobacteria	Competibacterales	Competibacteraceae	Competibacter	Competibacter denitrificans
DTU_2018_656_1_MG_BE_LE_344.vambbin.35202	Bacteria	Bacteroidetes	Bacteroidia	Flavobacteriales	PHOS-HE28	PHOS-HE28	PHOS-HE28 sp002396605
DTU_2018_656_1_MG_BE_LE_344.vambbin.4550	Bacteria	Acidobacteriota	Blastocatellia	Pyrinomonadales	Pyrinomonadaceae	OLB17	NA
DTU_2018_657_1_MG_BE_HA_345.vambbin.3699	Bacteria	Bacteroidetes	Bacteroidia	Flavobacteriales	Weeksellaceae	Chryseobacterium	NA
DTU_2018_657_1_MG_BE_HA_345.vambbin.5320	Bacteria	Proteobacteria	Gammaproteobacteria	Burkholderiales	Burkholderiaceae	Simplicispira	NA
DTU_2018_658_1_MG_CZ_PR_346.vambbin.1201	Bacteria	Proteobacteria	Gammaproteobacteria	Burkholderiales	Burkholderiaceae	Ottowia	NA
DTU_2018_658_1_MG_CZ_PR_346.vambbin.12313	Bacteria	Proteobacteria	Gammaproteobacteria	Burkholderiales	Burkholderiaceae	Ottowia	NA
DTU_2018_658_1_MG_CZ_PR_346.vambbin.15048	Bacteria	Proteobacteria	Alphaproteobacteria	Sphingomonadales	Sphingomonadaceae	Ga0077559	NA
DTU_2018_658_1_MG_CZ_PR_346.vambbin.161	Bacteria	Proteobacteria	Gammaproteobacteria	Xanthomonadales	Xanthomonadaceae	Thermomonas	NA
DTU_2018_658_1_MG_CZ_PR_346.vambbin.316	Bacteria	Verrucomicrobiota	Verrucomicrobiae	Verrucomicrobiales	Verrucomicrobiaceae	NA	NA
DTU_2018_658_1_MG_CZ_PR_346.vambbin.5303	Bacteria	Bacteroidetes	Bacteroidia	AKYH767-A	OLB10	OLB10	NA
DTU_2018_659_1_MG_CZ_BR_347.vambbin.12433	Bacteria	Hydrogenedentota	Hydrogenedentia	Hydrogenedentiales	NA	NA	NA
DTU_2018_664_1_MG_FR_SA_352.metabin.42	Bacteria	Myxococcota	Polyangia	Haliangiales	Haliangiaceae	UBA2376	NA
DTU_2018_665_1_MG_SA_KA_353.vambbin.20058	Bacteria	Proteobacteria	Alphaproteobacteria	Rhodobacterales	Rhodobacteraceae	UBA1943	NA
DTU_2018_665_1_MG_SA_KA_353.vambbin.568	Bacteria	Proteobacteria	Gammaproteobacteria	Burkholderiales	Burkholderiaceae	NA	NA
DTU_2018_666_1_MG_AT_VI_354.metabin.11	Bacteria	Bacteroidetes	Bacteroidia	Bacteroidales	UBA932	RC9	NA
DTU_2018_666_1_MG_AT_VI_354.metabin.44	Archaea	Halobacterota	Methanosarcinia	Methanotrichales	Methanotrichaceae	Methanothrix	Methanothrix
DTU_2018_666_1_MG_AT_VI_354.metabin.65	Bacteria	Bacteroidetes	Bacteroidia	Bacteroidales	UBA932	RC9	NA
DTU_2018_666_1_MG_AT_VI_354.vambbin.2635	Bacteria	Chloroflexota	Anaerolineae	NA	NA	NA	NA
DTU_2018_666_1_MG_AT_VI_354.vambbin.6295	Bacteria	Proteobacteria	Gammaproteobacteria	Pseudomonadales	Moraxellaceae	Acinetobacter	Acinetobacter baumannii
DTU_2018_668_1_MG_BF_OU_356.metabin.72	Bacteria	Cyanobacteria	Cyanobacteriia	Cyanobacteriales	Oscillatoriaceae	NA	NA
DTU_2018_669_1_MG_PT_LI_357.vambbin.4160	Bacteria	Firmicutes	Bacilli	Lactobacillales	Vagococcaceae	Vagococcus	NA
DTU_2018_670_1_MG_TG_LO_358.metabin.1	Bacteria	Synergistota	Synergistia	Synergistales	Synergistaceae	NA	NA
DTU_2018_671_1_MG_HU_BU_359.metabin.14	Bacteria	Synergistota	Synergistia	Synergistales	Synergistaceae	Syner-03	Syner-03 sp002306075
DTU_2018_671_1_MG_HU_BU_359.vambbin.2922	Bacteria	Bacteroidetes	Bacteroidia	Bacteroidales	4484-276	NA	NA
DTU_2018_672_1_MG_IT_NO_360.vambbin.482	Bacteria	Proteobacteria	Gammaproteobacteria	Enterobacterales	Enterobacteriaceae	Yersinia	Yersinia intermedia
DTU_2018_672_1_MG_IT_NO_360.vambbin.525	Bacteria	Firmicutes	Bacilli	Lactobacillales	Streptococcaceae	Lactococcus	Lactococcus lactis
DTU_2018_673_1_MG_IT_VE_361.metabin.22	Bacteria	Acidobacteriota	Blastocatellia	Pyrinomonadales	Pyrinomonadaceae	OLB17	NA
DTU_2018_673_1_MG_IT_VE_361.metabin.39	Bacteria	Proteobacteria	Alphaproteobacteria	Sphingomonadales	Sphingomonadaceae	NA	NA
DTU_2018_673_1_MG_IT_VE_361.metabin.75	Bacteria	Actinobacteriota	Acidimicrobiia	Microtrichales	UBA8139	NA	NA
DTU_2018_673_1_MG_IT_VE_361.vambbin.122823	Bacteria	Bacteroidetes	Ignavibacteria	SJA-28	B-1AR	NA	NA
DTU_2018_673_1_MG_IT_VE_361.vambbin.141427	Bacteria	Proteobacteria	Alphaproteobacteria	Sphingomonadales	Sphingomonadaceae	Ga0077559	NA
DTU_2018_673_1_MG_IT_VE_361.vambbin.21935	Bacteria	Proteobacteria	Gammaproteobacteria	Burkholderiales	Rhodocyclaceae	NA	NA
DTU_2018_673_1_MG_IT_VE_361.vambbin.3103	Bacteria	Firmicutes	Clostridia	Saccharofermentanales	Saccharofermentanaceae	Firm-13	NA
DTU_2018_673_1_MG_IT_VE_361.vambbin.7687	Bacteria	Bacteroidetes	Bacteroidia	Bacteroidales	BBW3	UBA8529	NA
DTU_2018_673_1_MG_IT_VE_361.vambbin.91223	Bacteria	Bacteroidetes	Bacteroidia	AKYH767-A	OLB10	NA	NA
DTU_2018_674_1_MG_IT_CA_362.vambbin.1419	Bacteria	Proteobacteria	Gammaproteobacteria	Thiotrichales	Thiotrichaceae	NA	NA
DTU_2018_676_1_MG_TR_HA_364.vambbin.26676	Bacteria	Synergistota	Synergistia	Synergistales	79-D21	79-D21	NA
DTU_2018_677_1_MG_HR_ZA_365.metabin.12	Bacteria	Proteobacteria	Gammaproteobacteria	Thiotrichales	Thiotrichaceae	Thiolinea	NA
DTU_2018_677_1_MG_HR_ZA_365.metabin.17	Bacteria	Proteobacteria	Gammaproteobacteria	Pseudomonadales	Moraxellaceae	Psychrobacter	NA
DTU_2018_677_1_MG_HR_ZA_365.vambbin.119001	Bacteria	Proteobacteria	Gammaproteobacteria	Burkholderiales	Rhodocyclaceae	NA	NA
DTU_2018_677_1_MG_HR_ZA_365.vambbin.4684	Bacteria	Proteobacteria	Gammaproteobacteria	Burkholderiales	Burkholderiaceae	NA	NA
DTU_2018_678_1_MG_EG_LE_366.metabin.21	Bacteria	Bacteroidetes	Bacteroidia	Flavobacteriales	Weeksellaceae	Empedobacter	Empedobacter falsenii
DTU_2018_683_1_MG_JP_JP_371.vambbin.250	Bacteria	Proteobacteria	Gammaproteobacteria	Pseudomonadales	Pseudomonadaceae	Pseudomonas	NA
DTU_2018_686_1_MG_CA_QE_374.metabin.44	Bacteria	Firmicutes	Negativicutes	Veillonellales	NA	NA	NA
DTU_2018_687_1_MG_PK_FA_375.vambbin.2225	Bacteria	Firmicutes	Bacilli	Erysipelotrichales	Erysipelotrichaceae	UBA2212	NA
DTU_2018_688_1_MG_RS_BE_376.metabin.35	Bacteria	Proteobacteria	Gammaproteobacteria	Burkholderiales	Burkholderiaceae	Aquabacterium	NA
DTU_2018_688_1_MG_RS_BE_376.metabin.5	Bacteria	Proteobacteria	Gammaproteobacteria	Burkholderiales	Burkholderiaceae	Aquabacterium	Aquabacterium sp001770725
DTU_2018_690_1_MG_BG_SO_378.vambbin.17403	Bacteria	Proteobacteria	Gammaproteobacteria	Pseudomonadales	Moraxellaceae	Psychrobacter	NA
DTU_2018_690_1_MG_BG_SO_378.vambbin.23401	Bacteria	Proteobacteria	Gammaproteobacteria	Pseudomonadales	Moraxellaceae	Psychrobacter	NA
DTU_2018_691_1_MG_NL_AM_380.vambbin.3308	Bacteria	Proteobacteria	Gammaproteobacteria	Pseudomonadales	Moraxellaceae	Psychrobacter	NA
DTU_2018_692_1_MG_ME_PO_381.metabin.57	Bacteria	Proteobacteria	Gammaproteobacteria	Enterobacterales	Enterobacteriaceae	Serratia	Serratia
DTU_2018_692_1_MG_ME_PO_381.vambbin.28802	Bacteria	Proteobacteria	Gammaproteobacteria	Pseudomonadales	Pseudomonadaceae	Pseudomonas	Pseudomonas
DTU_2018_692_1_MG_ME_PO_381.vambbin.360	Bacteria	Proteobacteria	Gammaproteobacteria	Pseudomonadales	Pseudomonadaceae	Pseudomonas	Pseudomonas
DTU_2018_693_1_MG_KR_GW_382.vambbin.19594	Bacteria	Campylobacterota	Campylobacteria	Campylobacterales	Arcobacteraceae	Aliarcobacter	NA
DTU_2018_694_1_MG_MU_SM_383.vambbin.994	Bacteria	Proteobacteria	Gammaproteobacteria	Enterobacterales	Enterobacteriaceae	Hafnia	Hafnia paralvei
DTU_2018_696_1_MG_GR_TH_385.metabin.51	Bacteria	Proteobacteria	Alphaproteobacteria	Rhizobiales	Hyphomicrobiaceae	NA	NA
DTU_2018_696_1_MG_GR_TH_385.vambbin.12078	Bacteria	Bacteroidetes	Bacteroidia	Bacteroidales	Dysgonomonadaceae	Proteiniphilum	NA
DTU_2018_696_1_MG_GR_TH_385.vambbin.81225	Bacteria	Chloroflexota	Anaerolineae	UBA3071	NA	NA	NA
DTU_2018_696_1_MG_GR_TH_385.vambbin.9553	Bacteria	Bacteroidetes	Bacteroidia	Bacteroidales	UBA932	DMER64	DMER64 sp001512865
DTU_2018_697_1_MG_PT_PO_386.vambbin.7281	Bacteria	Bacteroidetes	Bacteroidia	Flavobacteriales	Weeksellaceae	Chryseobacterium	NA
DTU_2018_698_1_MG_IN_KO_387.vambbin.1556	Bacteria	Proteobacteria	Gammaproteobacteria	Pseudomonadales	Moraxellaceae	Acinetobacter	Acinetobacter towneri
DTU_2018_698_1_MG_IN_KO_387.vambbin.29580	Bacteria	Bacteroidetes	Bacteroidia	Flavobacteriales	Weeksellaceae	Chryseobacterium	NA
DTU_2018_698_1_MG_IN_KO_387.vambbin.3796	Bacteria	Proteobacteria	Gammaproteobacteria	Burkholderiales	Burkholderiaceae	Janthinobacterium	NA
DTU_2018_702_1_MG_TW_TA_390.metabin.16	Bacteria	Bdellovibrionota	UBA2361	SZUA-149	SZUA-149	NA	NA
DTU_2018_702_1_MG_TW_TA_390.metabin.21	Bacteria	Acidobacteriota	Thermoanaerobaculia	UBA5066	UBA5066	UBA5066	NA
DTU_2018_702_1_MG_TW_TA_390.metabin.24	Bacteria	Proteobacteria	Gammaproteobacteria	Burkholderiales	Burkholderiaceae	Ottowia	NA
DTU_2018_702_1_MG_TW_TA_390.vambbin.103037	Bacteria	Verrucomicrobiota	Kiritimatiellae	NA	NA	NA	NA
DTU_2018_702_1_MG_TW_TA_390.vambbin.15615	Bacteria	Bacteroidetes	Bacteroidia	Chitinophagales	Chitinophagaceae	Niabella	NA
DTU_2018_702_1_MG_TW_TA_390.vambbin.24137	Bacteria	Bacteroidetes	Bacteroidia	AKYH767	b-17BO	NA	NA
DTU_2018_702_1_MG_TW_TA_390.vambbin.48448	Bacteria	Bacteroidetes	Bacteroidia	Flavobacteriales	PHOS-HE28	PHOS-HE28	NA
DTU_2018_702_1_MG_TW_TA_390.vambbin.631	Bacteria	Bacteroidetes	Bacteroidia	Chitinophagales	Saprospiraceae	OLB8	NA
DTU_2018_703_1_MG_IT_RO_391.vambbin.3419	Bacteria	Bacteroidetes	Bacteroidia	Bacteroidales	UBA1715	UBA1715	NA
DTU_2018_704_1_MG_CN_NA_392.metabin.25	Bacteria	Actinobacteriota	Acidimicrobiia	IMCC26256	PALSA-610	NA	NA
DTU_2018_704_1_MG_CN_NA_392.vambbin.16924	Bacteria	Proteobacteria	Gammaproteobacteria	Methylococcales	Methylococcaceae	UBA6136	NA
DTU_2018_704_1_MG_CN_NA_392.vambbin.67464	Bacteria	Acidobacteriota	Thermoanaerobaculia	UBA5704	NA	NA	NA
DTU_2018_705_1_MG_CN_YA_393.metabin.44	Bacteria	Caldisericota	Caldisericia	UBA4822	UBA4822	UBA4822	NA
DTU_2018_705_1_MG_CN_YA_393.vambbin.463	Bacteria	Bacteroidetes	Bacteroidia	Bacteroidales	vadinHA17	LD21	NA
DTU_2018_705_1_MG_CN_YA_393.vambbin.97	Bacteria	Synergistota	Synergistia	Synergistales	Synergistaceae	Syner-03	Syner-03 sp002316795
DTU_2018_706_1_MG_CH_BR_394.metabin.66	Bacteria	Proteobacteria	Gammaproteobacteria	Pseudomonadales	Moraxellaceae	Moraxella	Moraxella porci
DTU_2018_707_1_MG_CA_CA_395.vambbin.39602	Bacteria	Cloacimonadota	Cloacimonadia	Cloacimonadales	Cloacimonadaceae	UBA3900	NA
DTU_2018_707_1_MG_CA_CA_395.vambbin.698	Bacteria	Bacteroidetes	Bacteroidia	Bacteroidales	UBA932	DMER64	NA
DTU_2018_709_1_MG_KW_KW_397.metabin.25	Bacteria	Synergistota	Synergistia	Synergistales	Aminobacteriaceae	Fretibacterium	NA
DTU_2018_709_1_MG_KW_KW_397.vambbin.27599	Bacteria	Proteobacteria	Gammaproteobacteria	Xanthomonadales	Xanthomonadaceae	Lysobacter	NA
DTU_2018_711_1_MG_BR_BH_408.metabin.33	Bacteria	Bacteroidetes	Bacteroidia	Flavobacteriales	Flavobacteriaceae	Flavobacterium	NA
DTU_2018_711_1_MG_BR_BH_408.vambbin.107144	Bacteria	Bacteroidetes	Bacteroidia	Chitinophagales	Chitinophagaceae	Taibaiella	NA
DTU_2018_711_1_MG_BR_BH_408.vambbin.7012	Bacteria	Bacteroidetes	Bacteroidia	Sphingobacteriales	Sphingobacteriaceae	Pedobacter	NA
DTU_2018_712_1_MG_BB_WO_409.vambbin.14304	Bacteria	Proteobacteria	Gammaproteobacteria	Thiotrichales	Thiotrichaceae	NA	NA
DTU_2018_713_1_MG_BB_BR_410.metabin.79	Bacteria	Desulfobacterota	Desulfovibrionia	Desulfovibrionales	Desulfovibrionaceae	Desulfovibrio	NA
DTU_2018_714_1_MG_IN_UD_411.metabin.104	Bacteria	Thermotogota	Thermotogae	Petrotogales	Kosmotogaceae	Mesotoga	Mesotoga sp002305955
DTU_2018_714_1_MG_IN_UD_411.metabin.105	Bacteria	Bacteroidetes	Bacteroidia	Bacteroidales	UBA932	UBA1232	NA
DTU_2018_714_1_MG_IN_UD_411.metabin.19	Archaea	Euryarchaeota	Methanobacteria	Methanobacteriales	Methanobacteriaceae	Methanobacterium	NA
DTU_2018_714_1_MG_IN_UD_411.metabin.37	Bacteria	Desulfobacterota	Syntrophorhabdia	Syntrophorhabdales	Syntrophorhabdaceae	Delta-02	NA
DTU_2018_714_1_MG_IN_UD_411.metabin.41	Bacteria	Verrucomicrobiota	Verrucomicrobiae	Methylacidiphilales	Methylacidiphilaceae	LP2A	NA
DTU_2018_714_1_MG_IN_UD_411.metabin.76	Bacteria	Desulfobacterota	Desulfovibrionia	Desulfovibrionales	Desulfovibrionaceae	Bilophila	NA
DTU_2018_714_1_MG_IN_UD_411.metabin.98	Bacteria	Armatimonadota	UBA5829	UBA5829	NA	NA	NA
DTU_2018_714_1_MG_IN_UD_411.vambbin.106833	Bacteria	Bacteroidetes	Kapabacteria	Kapabacteriales	UBA2268	UBA2268	NA
DTU_2018_714_1_MG_IN_UD_411.vambbin.669	Bacteria	UBP3	UBA1439	NA	NA	NA	NA
DTU_2018_714_1_MG_IN_UD_411.vambbin.857	Bacteria	Caldisericota	Caldisericia	Caldisericales	Caldisericaceae	NA	NA
DTU_2018_714_1_MG_IN_UD_411.vambbin.8	Bacteria	Chloroflexota	Anaerolineae	Anaerolineales	Anaerolineaceae	T78	NA
DTU_2018_716_1_MG_EC_QU_413.metabin.35	Bacteria	Firmicutes	Clostridia	Oscillospirales	Oscillospiraceae	Pseudoflavonifractor	NA
DTU_2018_718_1_MG_CI_YA_415.vambbin.231	Bacteria	Proteobacteria	Gammaproteobacteria	Burkholderiales	Rhodocyclaceae	Dechloromonas	NA
DTU_2018_718_1_MG_CI_YA_415.vambbin.519	Bacteria	Desulfuromonadota	Desulfuromonadia	Geobacterales	Pelobacteraceae	NA	NA
DTU_2018_719_1_MG_CI_BO_416.metabin.21	Bacteria	Proteobacteria	Alphaproteobacteria	Caulobacterales	Caulobacteraceae	Brevundimonas	NA
DTU_2018_719_1_MG_CI_BO_416.metabin.37	Bacteria	Proteobacteria	Alphaproteobacteria	Rhodobacterales	Rhodobacteraceae	XJSP	XJSP sp002794355
DTU_2018_719_1_MG_CI_BO_416.metabin.56	Bacteria	Bacteroidetes	Bacteroidia	Cytophagales	Spirosomaceae	NA	NA
DTU_2018_719_1_MG_CI_BO_416.metabin.79	Bacteria	Proteobacteria	Alphaproteobacteria	Acetobacterales	Acetobacteraceae	Rubritepida	NA
DTU_2018_719_1_MG_CI_BO_416.vambbin.2093	Bacteria	Proteobacteria	Gammaproteobacteria	Burkholderiales	Burkholderiaceae	Comamonas	NA
DTU_2018_719_1_MG_CI_BO_416.vambbin.212	Bacteria	Proteobacteria	Gammaproteobacteria	Burkholderiales	Rhodocyclaceae	Thauera	Thauera sp000310145
DTU_2018_719_1_MG_CI_BO_416.vambbin.4279	Bacteria	Proteobacteria	Gammaproteobacteria	Pseudomonadales	Pseudomonadaceae	Pseudomonas	Pseudomonas
DTU_2018_719_1_MG_CI_BO_416.vambbin.722606	Bacteria	Proteobacteria	Gammaproteobacteria	Xanthomonadales	Xanthomonadaceae	Stenotrophomonas	NA
DTU_2018_720_1_MG_CA_OT_417.metabin.35	Bacteria	Proteobacteria	Alphaproteobacteria	Reyranellales	Reyranellaceae	Reyranella	NA
DTU_2018_720_1_MG_CA_OT_417.metabin.55	Bacteria	Bdellovibrionota	UBA2361	SZUA-149	NA	NA	NA
DTU_2018_720_1_MG_CA_OT_417.vambbin.1954	Bacteria	Proteobacteria	Gammaproteobacteria	Burkholderiales	Burkholderiaceae	NA	NA
DTU_2018_728_1_MG_MY_KL_1_425.metabin.32	Bacteria	Bacteroidetes	Bacteroidia	Chitinophagales	Saprospiraceae	UBA3362	NA
DTU_2018_728_1_MG_MY_KL_1_425.vambbin.15542	Bacteria	Planctomycetota	Phycisphaerae	UBA1845	Fen-1342	Fen-1342	NA
DTU_2018_729_1_MG_MY_IH_426.vambbin.1659	Bacteria	Bacteroidetes	Bacteroidia	Bacteroidales	Dysgonomonadaceae	UBA1309	NA
DTU_2018_729_1_MG_MY_IH_426.vambbin.1789	Bacteria	Firmicutes	Negativicutes	Veillonellales	NA	NA	NA
DTU_2018_729_1_MG_MY_IH_426.vambbin.2021	Bacteria	Proteobacteria	Gammaproteobacteria	Burkholderiales	Burkholderiaceae	Sphaerotilus	NA
DTU_2018_729_1_MG_MY_IH_426.vambbin.97200	Bacteria	Firmicutes	Negativicutes	Veillonellales	NA	NA	NA
DTU_2018_730_1_MG_MY_KG_427.metabin.34	Bacteria	Desulfobacterota	Desulfovibrionia	Desulfovibrionales	Desulfovibrionaceae	Desulfovibrio	NA
DTU_2018_731_1_MG_NZ_CH_428.vambbin.19759	Bacteria	Firmicutes	Negativicutes	NA	NA	NA	NA
DTU_2018_731_1_MG_NZ_CH_428.vambbin.598	Bacteria	Bacteroidetes	Bacteroidia	Flavobacteriales	Weeksellaceae	Chryseobacterium	NA
DTU_2018_732_1_MG_LV_RI_429.metabin.55	Bacteria	Firmicutes	Negativicutes	Veillonellales	Veillonellaceae	Veillonella	NA
DTU_2018_733_1_MG_LV_LI_430.metabin.37	Bacteria	Proteobacteria	Alphaproteobacteria	Sphingomonadales	Sphingomonadaceae	Sphingomonas	NA
DTU_2018_733_1_MG_LV_LI_430.vambbin.153	Bacteria	Proteobacteria	Gammaproteobacteria	Burkholderiales	Rhodocyclaceae	Thauera	NA
DTU_2018_733_1_MG_LV_LI_430.vambbin.2541	Bacteria	Proteobacteria	Gammaproteobacteria	Xanthomonadales	Xanthomonadaceae	Lysobacter	NA
DTU_2018_734_1_MG_GB_EB_431.vambbin.11954	Bacteria	Proteobacteria	Gammaproteobacteria	Burkholderiales	Burkholderiaceae	Simplicispira	NA
DTU_2018_734_1_MG_GB_EB_431.vambbin.19153	Bacteria	Proteobacteria	Gammaproteobacteria	Burkholderiales	Burkholderiaceae	Polaromonas	NA
DTU_2018_735_1_MG_CI_YA_2_432.vambbin.225083	Bacteria	Firmicutes	Clostridia	Lachnospirales	Lachnospiraceae	Oribacterium	NA
DTU_2018_735_1_MG_CI_YA_2_432.vambbin.3208	Bacteria	Proteobacteria	Gammaproteobacteria	Pseudomonadales	Pseudomonadaceae	Pseudomonas	Pseudomonas
DTU_2018_735_1_MG_CI_YA_2_432.vambbin.4295	Bacteria	Proteobacteria	Alphaproteobacteria	Rhodobacterales	Rhodobacteraceae	Rhodobacter	Rhodobacter
DTU_2018_735_1_MG_CI_YA_2_432.vambbin.46705	Bacteria	Firmicutes	Bacilli	Erysipelotrichales	Erysipelatoclostridiaceae	NA	NA
DTU_2018_737_1_MG_CL_SA_434.metabin.18	Bacteria	Verrucomicrobiota	Kiritimatiellae	LD1-PB3	Lenti-01	Lenti-01	NA
DTU_2018_738_1_MG_CL_SA_2_435.vambbin.4645	Bacteria	Proteobacteria	Gammaproteobacteria	Enterobacterales	Enterobacteriaceae	Erwinia	NA
DTU_2018_739_1_MG_FI_TU_436.metabin.40	Bacteria	Proteobacteria	Gammaproteobacteria	Burkholderiales	Neisseriaceae	Neisseria	NA
DTU_2018_739_1_MG_FI_TU_436.vambbin.4093	Bacteria	Proteobacteria	Gammaproteobacteria	Competibacterales	Competibacteraceae	Contendobacter	NA
DTU_2018_739_1_MG_FI_TU_436.vambbin.921	Bacteria	Bacteroidetes	Bacteroidia	Flavobacteriales	Weeksellaceae	Chryseobacterium	NA
DTU_2018_740_1_MG_FI_HE_437.metabin.42	Bacteria	Proteobacteria	Alphaproteobacteria	Rhizobiales	Pleomorphomonadaceae	Pleomorphomonas	NA
DTU_2018_740_1_MG_FI_HE_437.vambbin.4907	Bacteria	Proteobacteria	Gammaproteobacteria	Pseudomonadales	Moraxellaceae	Psychrobacter	NA
DTU_2018_741_1_MG_FI_OU_438.metabin.137	Bacteria	Proteobacteria	Gammaproteobacteria	Xanthomonadales	Xanthomonadaceae	NA	NA
DTU_2018_741_1_MG_FI_OU_438.metabin.140	Bacteria	Bacteroidetes	Bacteroidia	Chitinophagales	Chitinophagaceae	Ferruginibacter	NA
DTU_2018_741_1_MG_FI_OU_438.metabin.15	Bacteria	Proteobacteria	Alphaproteobacteria	Sphingomonadales	Sphingomonadaceae	NA	NA
DTU_2018_741_1_MG_FI_OU_438.metabin.75	Bacteria	Proteobacteria	Gammaproteobacteria	Xanthomonadales	Xanthomonadaceae	Luteimonas	NA
DTU_2018_741_1_MG_FI_OU_438.vambbin.121980	Bacteria	Bacteroidetes	Bacteroidia	Flavobacteriales	PHOS-HE28	PHOS-HE28	NA
DTU_2018_741_1_MG_FI_OU_438.vambbin.8165	Bacteria	Bacteroidetes	Bacteroidia	Chitinophagales	Saprospiraceae	OLB9	NA
DTU_2018_742_1_MG_NO_OS_439.vambbin.74097	Bacteria	Proteobacteria	Gammaproteobacteria	Burkholderiales	Burkholderiaceae	SCGC-AAA027-K21	NA
DTU_2018_743_1_MG_GL_SI_440.metabin.29	Bacteria	Proteobacteria	Gammaproteobacteria	Burkholderiales	Burkholderiaceae	Brachymonas	NA
DTU_2018_743_1_MG_GL_SI_440.metabin.77	Bacteria	Proteobacteria	Gammaproteobacteria	Burkholderiales	Burkholderiaceae	Ottowia	NA
DTU_2018_743_1_MG_GL_SI_440.vambbin.101	Bacteria	Firmicutes	Bacilli	Lactobacillales	Lactobacillaceae	Lactobacillus	Lactobacillus delbrueckii
DTU_2018_744_1_MG_IL_BE_441.metabin.106	Bacteria	Bacteroidetes	Bacteroidia	Flavobacteriales	Flavobacteriaceae	Flavobacterium	NA
DTU_2018_744_1_MG_IL_BE_441.metabin.117	Bacteria	Proteobacteria	Gammaproteobacteria	Xanthomonadales	Xanthomonadaceae	Pseudoxanthomonas	NA
DTU_2018_744_1_MG_IL_BE_441.metabin.19	Bacteria	Proteobacteria	Gammaproteobacteria	Burkholderiales	Burkholderiaceae	Polaromonas	NA
DTU_2018_744_1_MG_IL_BE_441.metabin.45	Bacteria	Campylobacterota	Campylobacteria	Campylobacterales	Arcobacteraceae	Aliarcobacter	NA
DTU_2018_744_1_MG_IL_BE_441.metabin.80	Bacteria	Proteobacteria	Alphaproteobacteria	Rhizobiales	Rhizobiaceae	NA	NA
DTU_2018_744_1_MG_IL_BE_441.vambbin.259274	Bacteria	Proteobacteria	Gammaproteobacteria	Pseudomonadales	Pseudomonadaceae	Pseudomonas	NA
DTU_2018_744_1_MG_IL_BE_441.vambbin.37185	Bacteria	Proteobacteria	Gammaproteobacteria	Burkholderiales	Burkholderiaceae	Simplicispira	NA
DTU_2018_744_1_MG_IL_BE_441.vambbin.805	Bacteria	Desulfobacterota	Desulfobulbia	Desulfobulbales	Desulfobulbaceae	ORNL	NA
DTU_2018_745_1_MG_BJ_AZ_442.metabin.31	Bacteria	Proteobacteria	Gammaproteobacteria	Steroidobacterales	Steroidobacteraceae	UBA964	NA
DTU_2018_747_1_MG_BJ_DJ_444.metabin.140	Bacteria	Firmicutes	Clostridia	Oscillospirales	Acutalibacteraceae	UBA1425	NA
DTU_2018_747_1_MG_BJ_DJ_444.metabin.147	Bacteria	Firmicutes	Clostridia	Lutisporales	Lutisporaceae	NA	NA
DTU_2018_747_1_MG_BJ_DJ_444.metabin.30	Bacteria	Verrucomicrobiota	Verrucomicrobiae	Verrucomicrobiales	NA	NA	NA
DTU_2018_747_1_MG_BJ_DJ_444.metabin.6	Bacteria	Bacteroidetes	Bacteroidia	Bacteroidales	Dysgonomonadaceae	Proteiniphilum	NA
DTU_2018_747_1_MG_BJ_DJ_444.metabin.77	Bacteria	Bacteroidetes	Bacteroidia	Bacteroidales	Dysgonomonadaceae	UBA2632	NA
DTU_2018_747_1_MG_BJ_DJ_444.metabin.85	Archaea	Halobacterota	Methanosarcinia	Methanotrichales	Methanotrichaceae	Methanothrix	Methanothrix
DTU_2018_747_1_MG_BJ_DJ_444.vambbin.18202	Bacteria	Bacteroidetes	Bacteroidia	Bacteroidales	FEN-979	NA	NA
DTU_2018_747_1_MG_BJ_DJ_444.vambbin.26201	Bacteria	Bacteroidetes	Bacteroidia	Bacteroidales	Dysgonomonadaceae	Petrimonas	NA
DTU_2018_747_1_MG_BJ_DJ_444.vambbin.4324	Bacteria	Desulfobacterota	Desulfovibrionia	Desulfovibrionales	Desulfomicrobiaceae	NA	NA
DTU_2018_747_1_MG_BJ_DJ_444.vambbin.63429	Bacteria	Proteobacteria	Gammaproteobacteria	Burkholderiales	Burkholderiaceae	Burkholderia	Burkholderia sp000687455
DTU_2018_747_1_MG_BJ_DJ_444.vambbin.72094	Bacteria	Firmicutes	Clostridia	Oscillospirales	Acutalibacteraceae	UBA1447	NA
DTU_2018_748_1_MG_GB_NC_445.vambbin.29489	Bacteria	Proteobacteria	Gammaproteobacteria	Xanthomonadales	Xanthomonadaceae	Pseudoxanthomonas	NA
DTU_2018_748_1_MG_GB_NC_445.vambbin.77924	Bacteria	Proteobacteria	Gammaproteobacteria	Burkholderiales	Burkholderiaceae	Polaromonas	NA
DTU_2018_748_1_MG_GB_NC_445.vambbin.97523	Bacteria	Proteobacteria	Gammaproteobacteria	Legionellales	NA	NA	NA
DTU_2018_749_1_MG_BD_DH_446.vambbin.1455	Bacteria	Proteobacteria	Gammaproteobacteria	Pseudomonadales	Moraxellaceae	Psychrobacter	Psychrobacter sp000213615
DTU_2018_749_1_MG_BD_DH_446.vambbin.5036	Bacteria	Proteobacteria	Gammaproteobacteria	Pseudomonadales	Pseudomonadaceae	Pseudomonas	Pseudomonas
DTU_2018_749_1_MG_BD_DH_446.vambbin.9593	Bacteria	Proteobacteria	Gammaproteobacteria	Pseudomonadales	Moraxellaceae	Acinetobacter	Acinetobacter schindleri
DTU_2018_750_1_MG_KE_NA_447.metabin.99	Bacteria	Chloroflexota	Anaerolineae	UBA3071	CG2-30-64-16	NA	NA
DTU_2018_750_1_MG_KE_NA_447.vambbin.477	Bacteria	Verrucomicrobiota	Kiritimatiellae	LD1-PB3	Lenti-01	Lenti-01	NA
DTU_2018_750_1_MG_KE_NA_447.vambbin.672	Bacteria	Actinobacteriota	Actinobacteria	Actinomycetales	Bifidobacteriaceae	Bifidobacterium	Bifidobacterium subtile
DTU_2018_750_1_MG_KE_NA_447.vambbin.962	Bacteria	Verrucomicrobiota	Kiritimatiellae	LD1-PB3	Lenti-01	Lenti-01	Lenti-01 sp002304915
DTU_2018_753_1_MG_LC_CA_450.vambbin.495	Bacteria	Proteobacteria	Gammaproteobacteria	Pseudomonadales	Pseudomonadaceae	Pseudomonas	Pseudomonas
DTU_2018_754_1_MG_LC_GR_451.vambbin.14971	Bacteria	Desulfobacterota	Desulfovibrionia	Desulfovibrionales	Desulfovibrionaceae	NA	NA
DTU_2018_755_1_MG_MK_SK_452.vambbin.961	Bacteria	Proteobacteria	Gammaproteobacteria	Burkholderiales	Aquaspirillaceae	Laribacter	Laribacter hongkongensis
DTU_2018_756_1_MG_MK_SK_453.vambbin.218249	Bacteria	Proteobacteria	Gammaproteobacteria	Burkholderiales	Burkholderiaceae	Massilia	NA
DTU_2018_756_1_MG_MK_SK_453.vambbin.4877	Bacteria	Proteobacteria	Gammaproteobacteria	Burkholderiales	Burkholderiaceae	Janthinobacterium	NA
DTU_2018_756_1_MG_MK_SK_453.vambbin.5747	Bacteria	Proteobacteria	Gammaproteobacteria	Pseudomonadales	Pseudomonadaceae	Pseudomonas	Pseudomonas
DTU_2018_758_1_MG_AU_DD_455.vambbin.18841	Bacteria	Desulfobacterota	Desulfobulbia	Desulfobulbales	Desulfobulbaceae	ORNL	NA
DTU_2018_759_1_MG_AU_MA_456.metabin.25	Bacteria	Actinobacteriota	Coriobacteriia	Coriobacteriales	Atopobiaceae	Olsenella	Olsenella
DTU_2018_759_1_MG_AU_MA_456.metabin.30	Bacteria	Firmicutes	Negativicutes	Selenomonadales	Selenomonadaceae	NA	NA
DTU_2018_759_1_MG_AU_MA_456.metabin.32	Bacteria	Proteobacteria	Gammaproteobacteria	Burkholderiales	Burkholderiaceae	NA	NA
DTU_2018_759_1_MG_AU_MA_456.metabin.33	Bacteria	Proteobacteria	Gammaproteobacteria	Burkholderiales	Neisseriaceae	Neisseria	NA
DTU_2018_759_1_MG_AU_MA_456.vambbin.1376	Bacteria	Fusobacteriota	Fusobacteriia	Fusobacteriales	Leptotrichiaceae	Sebaldella	NA
DTU_2018_759_1_MG_AU_MA_456.vambbin.184550	Bacteria	Actinobacteriota	Actinobacteria	Actinomycetales	Bifidobacteriaceae	Bifidobacterium	NA
DTU_2018_759_1_MG_AU_MA_456.vambbin.1859	Bacteria	Proteobacteria	Gammaproteobacteria	Enterobacterales	Aeromonadaceae	Tolumonas	NA
DTU_2018_759_1_MG_AU_MA_456.vambbin.2010	Bacteria	Actinobacteriota	Actinobacteria	Actinomycetales	Actinomycetaceae	Pauljensenia	NA
DTU_2018_761_1_MG_CM_YA_458.vambbin.10120	Bacteria	Firmicutes	Bacilli	Lactobacillales	Carnobacteriaceae	Carnobacterium	Carnobacterium divergens
DTU_2018_762_1_MG_PY_SL_459.metabin.10	Bacteria	Proteobacteria	Gammaproteobacteria	Pseudomonadales	Moraxellaceae	Moraxella	Moraxella
DTU_2018_762_1_MG_PY_SL_459.vambbin.2282	Bacteria	Proteobacteria	Gammaproteobacteria	Pseudomonadales	Moraxellaceae	Acinetobacter	NA
DTU_2018_763_1_MG_DE_BE_460.metabin.12	Bacteria	Acidobacteriota	Blastocatellia	Pyrinomonadales	Pyrinomonadaceae	OLB17	NA
DTU_2018_763_1_MG_DE_BE_460.metabin.42	Bacteria	Proteobacteria	Alphaproteobacteria	Sphingomonadales	Sphingomonadaceae	Ga0077559	NA
DTU_2018_763_1_MG_DE_BE_460.metabin.6	Bacteria	Proteobacteria	Gammaproteobacteria	Competibacterales	Competibacteraceae	Competibacter	NA
DTU_2018_763_1_MG_DE_BE_460.metabin.74	Bacteria	Proteobacteria	Gammaproteobacteria	Chromatiales	Chromatiaceae	NA	NA
DTU_2018_763_1_MG_DE_BE_460.vambbin.2869	Bacteria	Proteobacteria	Alphaproteobacteria	Sphingomonadales	Sphingomonadaceae	Ga0077559	NA
DTU_2018_764_1_MG_US_CH_461.vambbin.9952	Bacteria	Proteobacteria	Gammaproteobacteria	Burkholderiales	Neisseriaceae	Neisseria	NA
DTU_2018_765_1_MG_MG_AN_462.metabin.20	Bacteria	Armatimonadota	Fimbriimonadia	Fimbriimonadales	Fimbriimonadaceae	UphvI-Ar2	UphvI-Ar2 sp002162095
DTU_2018_765_1_MG_MG_AN_462.metabin.2	Bacteria	Planctomycetota	Planctomycetes	Pirellulales	UBA1268	BAIKAL-G1-2R	NA
DTU_2018_765_1_MG_MG_AN_462.metabin.31	Bacteria	Planctomycetota	Phycisphaerae	Phycisphaerales	SM1A02	NA	NA
DTU_2018_765_1_MG_MG_AN_462.metabin.37	Bacteria	Verrucomicrobiota	Verrucomicrobiae	Chthoniobacterales	NA	NA	NA
DTU_2018_765_1_MG_MG_AN_462.metabin.44	Bacteria	Proteobacteria	Alphaproteobacteria	Rhodobacterales	Rhodobacteraceae	Rhodobacter	NA
DTU_2018_765_1_MG_MG_AN_462.metabin.55	Bacteria	Planctomycetota	Planctomycetes	Pirellulales	UBA1268	NA	NA
DTU_2018_765_1_MG_MG_AN_462.metabin.72	Bacteria	Verrucomicrobiota	Chlamydiia	Parachlamydiales	SM23-39	2-02-FULL-45-22	NA
DTU_2018_765_1_MG_MG_AN_462.vambbin.617037	Bacteria	Proteobacteria	Gammaproteobacteria	Burkholderiales	Burkholderiaceae	UBA4615	NA
DTU_2018_765_1_MG_MG_AN_462.vambbin.84272	Bacteria	Proteobacteria	Alphaproteobacteria	Caulobacterales	Caulobacteraceae	Brevundimonas	NA
DTU_2018_766_1_MG_MG_AN_1_463.metabin.2	Bacteria	Planctomycetota	Planctomycetes	Pirellulales	Pirellulaceae	Pirellula	NA
DTU_2018_766_1_MG_MG_AN_1_463.metabin.33	Bacteria	Proteobacteria	Alphaproteobacteria	Rhodobacterales	Rhodobacteraceae	TH137	NA
DTU_2018_766_1_MG_MG_AN_1_463.metabin.43	Bacteria	Armatimonadota	Fimbriimonadia	Fimbriimonadales	Fimbriimonadaceae	NA	NA
DTU_2018_766_1_MG_MG_AN_1_463.metabin.44	Bacteria	Proteobacteria	Gammaproteobacteria	Burkholderiales	Burkholderiaceae	UBA4615	NA
DTU_2018_766_1_MG_MG_AN_1_463.metabin.57	Bacteria	Bacteroidetes	Kapabacteria	Kapabacteriales	NA	NA	NA
DTU_2018_766_1_MG_MG_AN_1_463.metabin.76	Bacteria	Planctomycetota	Phycisphaerae	Phycisphaerales	SM1A02	UBA2402	NA
DTU_2018_766_1_MG_MG_AN_1_463.metabin.80	Bacteria	Planctomycetota	Planctomycetes	Pirellulales	Pirellulaceae	Pirellula	NA
DTU_2018_766_1_MG_MG_AN_1_463.vambbin.12851	Bacteria	Verrucomicrobiota	Verrucomicrobiae	Verrucomicrobiales	Verrucomicrobiaceae	NA	NA
DTU_2018_766_1_MG_MG_AN_1_463.vambbin.42587	Bacteria	Proteobacteria	Alphaproteobacteria	Rhizobiales	Beijerinckiaceae	NA	NA
DTU_2018_767_1_MG_SG_JU_464.metabin.10	Bacteria	Proteobacteria	Gammaproteobacteria	Burkholderiales	Burkholderiaceae	Oligella	Oligella urethralis
DTU_2018_768_1_MG_LB_SM_465.metabin.26	Bacteria	Proteobacteria	Gammaproteobacteria	Enterobacterales	Aeromonadaceae	Aeromonas	Aeromonas hydrophila
DTU_2018_769_1_MG_LB_RB_466.metabin.38	Bacteria	Proteobacteria	Alphaproteobacteria	Caulobacterales	Caulobacteraceae	Phenylobacterium	NA
DTU_2018_770_1_MG_LB_TR_467.metabin.35	Bacteria	Bacteroidetes	Bacteroidia	Flavobacteriales	Weeksellaceae	Cloacibacterium	Cloacibacterium sp002422665
DTU_2018_773_1_MG_MG_AN_2_470.metabin.75	Bacteria	Actinobacteriota	Actinobacteria	Actinomycetales	Microbacteriaceae	Pontimonas	NA
DTU_2018_773_1_MG_MG_AN_2_470.metabin.7	Bacteria	Verrucomicrobiota	Verrucomicrobiae	Chthoniobacterales	NA	NA	NA
DTU_2018_773_1_MG_MG_AN_2_470.vambbin.28617	Bacteria	Verrucomicrobiota	Verrucomicrobiae	Chthoniobacterales	NA	NA	NA
DTU_2018_773_1_MG_MG_AN_2_470.vambbin.81	Bacteria	Proteobacteria	Gammaproteobacteria	Pseudomonadales	Pseudomonadaceae	Pseudomonas	Pseudomonas
DTU_2018_774_1_MG_TH_PA_471.metabin.11	Bacteria	Bdellovibrionota	Bdellovibrionia	Bdellovibrionales	NA	NA	NA
DTU_2018_774_1_MG_TH_PA_471.metabin.37	Bacteria	Bacteroidetes	Bacteroidia	Bacteroidales	F082	UBA6192	NA
DTU_2018_774_1_MG_TH_PA_471.metabin.71	Bacteria	Verrucomicrobiota	Kiritimatiellae	NA	NA	NA	NA
DTU_2018_774_1_MG_TH_PA_471.vambbin.21059	Bacteria	Verrucomicrobiota	Kiritimatiellae	NA	NA	NA	NA
DTU_2018_775_1_MG_PK_KA_472.metabin.58	Bacteria	Proteobacteria	Gammaproteobacteria	Xanthomonadales	Xanthomonadaceae	Thermomonas	NA
DTU_2018_775_1_MG_PK_KA_472.vambbin.51014	Bacteria	Proteobacteria	Gammaproteobacteria	Pseudomonadales	Moraxellaceae	Acinetobacter	NA
DTU_2018_775_1_MG_PK_KA_472.vambbin.75	Bacteria	Proteobacteria	Gammaproteobacteria	Enterobacterales	Enterobacteriaceae	Buttiauxella	Buttiauxella gaviniae
DTU_2018_776_1_MG_BR_RJ_473.metabin.31	Bacteria	Proteobacteria	Gammaproteobacteria	Burkholderiales	Sulfuricellaceae	Sulfuricella	NA
DTU_2018_776_1_MG_BR_RJ_473.metabin.69	Bacteria	Chloroflexota	Anaerolineae	Caldilineales	NA	NA	NA
DTU_2018_776_1_MG_BR_RJ_473.vambbin.2414	Bacteria	Proteobacteria	Gammaproteobacteria	Xanthomonadales	Ahniellaceae	NA	NA
DTU_2018_776_1_MG_BR_RJ_473.vambbin.42461	Bacteria	Proteobacteria	Alphaproteobacteria	Rhodospirillales	2-12-FULL-67-15	NA	NA
DTU_2018_776_1_MG_BR_RJ_473.vambbin.50416	Bacteria	Proteobacteria	Gammaproteobacteria	Burkholderiales	NA	NA	NA
DTU_2018_777_1_MG_BR_BE_474.metabin.51	Bacteria	Proteobacteria	Gammaproteobacteria	Competibacterales	Competibacteraceae	Contendobacter	NA
DTU_2018_777_1_MG_BR_BE_474.metabin.59	Bacteria	Proteobacteria	Gammaproteobacteria	Chromatiales	Chromatiaceae	NA	NA
DTU_2018_777_1_MG_BR_BE_474.metabin.71	Bacteria	Desulfobacterota	Desulfobulbia	Desulfobulbales	Desulfobulbaceae	ORNL	NA
DTU_2018_777_1_MG_BR_BE_474.metabin.76	Bacteria	Verrucomicrobiota	Kiritimatiellae	RFP12	UBA1067	NA	NA
DTU_2018_778_1_MG_US_AT_475.metabin.108	Bacteria	Firmicutes	Bacilli	Erysipelotrichales	Erysipelotrichaceae	NA	NA
DTU_2018_778_1_MG_US_AT_475.metabin.32	Bacteria	Firmicutes	Bacilli	RFN20	CAG-288	NA	NA
DTU_2018_778_1_MG_US_AT_475.metabin.43	Bacteria	Bacteroidetes	Bacteroidia	Bacteroidales	BM520	NA	NA
DTU_2018_778_1_MG_US_AT_475.metabin.44	Bacteria	Firmicutes	Clostridia	Oscillospirales	Oscillospiraceae	NA	NA
DTU_2018_778_1_MG_US_AT_475.metabin.83	Bacteria	Firmicutes	Bacilli	RF39	CAG-611	RUG591	NA
DTU_2018_778_1_MG_US_AT_475.metabin.85	Bacteria	Bacteroidetes	Bacteroidia	Bacteroidales	UBA932	RC9	NA
DTU_2018_778_1_MG_US_AT_475.vambbin.200607	Bacteria	Chloroflexota	Anaerolineae	Anaerolineales	Anaerolineaceae	Flexilinea	NA
DTU_2018_778_1_MG_US_AT_475.vambbin.2734	Bacteria	Firmicutes	Clostridia	Christensenellales	CAG-74	Firm-11	NA
DTU_2018_779_1_MG_US_WA_476.vambbin.218986	Bacteria	Chloroflexota	Anaerolineae	Caldilineales	Caldilineaceae	Caldilinea	Caldilinea sp002391565
DTU_2018_779_1_MG_US_WA_476.vambbin.469	Bacteria	Firmicutes	Negativicutes	Veillonellales	Veillonellaceae	Veillonella	NA
DTU_2018_779_1_MG_US_WA_476.vambbin.74391	Bacteria	Campylobacterota	Campylobacteria	Campylobacterales	Sulfurospirillaceae	Sulfurospirillum	NA
DTU_2018_780_1_MG_AE_DU_477.metabin.75	Bacteria	Proteobacteria	Gammaproteobacteria	Halothiobacillales	Halothiobacillaceae	NA	NA
DTU_2018_780_1_MG_AE_DU_477.vambbin.11667	Bacteria	Proteobacteria	Gammaproteobacteria	Burkholderiales	Rhodocyclaceae	Tepidiphilus	NA
DTU_2018_780_1_MG_AE_DU_477.vambbin.171606	Bacteria	Firmicutes	Negativicutes	Veillonellales	NA	NA	NA
DTU_2018_780_1_MG_AE_DU_477.vambbin.2888	Bacteria	Firmicutes	Negativicutes	Propionisporales	NA	NA	NA
DTU_2018_781_1_MG_VN_HO_478.metabin.12	Bacteria	Bacteroidetes	Bacteroidia	Bacteroidales	TTA-H9	NA	NA
DTU_2018_781_1_MG_VN_HO_478.metabin.35	Bacteria	Verrucomicrobiota	Kiritimatiellae	UBA8416	NA	NA	NA
DTU_2018_781_1_MG_VN_HO_478.metabin.44	Bacteria	Bacteroidetes	Bacteroidia	Chitinophagales	Chitinophagaceae	JJ008	NA
DTU_2018_781_1_MG_VN_HO_478.metabin.7	Bacteria	Proteobacteria	Gammaproteobacteria	Burkholderiales	Rhodocyclaceae	Dechloromonas	NA
DTU_2018_781_1_MG_VN_HO_478.metabin.93	Bacteria	Firmicutes	Clostridia	Peptostreptococcales	Anaerovoracaceae	W-Firmicutes-11	NA
DTU_2018_781_1_MG_VN_HO_478.vambbin.139356	Bacteria	Bdellovibrionota	UBA2651	NA	NA	NA	NA
DTU_2018_781_1_MG_VN_HO_478.vambbin.4894	Bacteria	Hydrogenedentota	Hydrogenedentia	Hydrogenedentiales	NA	NA	NA
DTU_2018_781_1_MG_VN_HO_478.vambbin.4917	Bacteria	Proteobacteria	Alphaproteobacteria	Sphingomonadales	Sphingomonadaceae	Novosphingobium	NA
DTU_2018_783_1_MG_CN_GU_480.vambbin.8590	Bacteria	Bdellovibrionota	UBA2361	UBA2361	NA	NA	NA
DTU_2018_784_1_MG_NZ_DU_481.vambbin.4100	Bacteria	Proteobacteria	Gammaproteobacteria	Burkholderiales	Burkholderiaceae	B-9	NA
DTU_2018_785_1_MG_TZ_MS_482.vambbin.1309	Bacteria	Desulfobacterota	Desulfobulbia	Desulfobulbales	Desulfobulbaceae	ORNL	NA
DTU_2018_795_1_MG_GH_AC_561.metabin.16	Bacteria	Firmicutes	Clostridia	Lachnospirales	Lachnospiraceae	UBA2868	NA
DTU_2018_795_1_MG_GH_AC_561.metabin.21	Bacteria	Proteobacteria	Alphaproteobacteria	Sphingomonadales	Sphingomonadaceae	UBA6171	NA
DTU_2018_795_1_MG_GH_AC_561.metabin.76	Bacteria	Cloacimonadota	Cloacimonadia	Cloacimonadales	Cloacimonadaceae	NA	NA
DTU_2018_795_1_MG_GH_AC_561.metabin.82	Bacteria	Bacteroidetes	Bacteroidia	Bacteroidales	Prolixibacteraceae	UBA1413	UBA1413 sp002304925
DTU_2018_795_1_MG_GH_AC_561.vambbin.214	Bacteria	Desulfobacterota	Syntrophorhabdia	Syntrophorhabdales	Syntrophorhabdaceae	Delta-02	Delta-02 sp002408185
DTU_2018_795_1_MG_GH_AC_561.vambbin.4184	Bacteria	Bacteroidetes	Bacteroidia	Bacteroidales	Dysgonomonadaceae	Fermentimonas	NA
DTU_2018_796_1_MG_GH_AC_2_566.metabin.74	Bacteria	Firmicutes	Bacilli	Lactobacillales	Streptococcaceae	Lactococcus	NA
DTU_2018_799_1_MG_AT_VI_483.metabin.46	Bacteria	Firmicutes	Clostridia	Oscillospirales	Oscillospiraceae	CAG-83	NA
DTU_2018_799_1_MG_AT_VI_483.vambbin.3151	Bacteria	Bacteroidetes	Bacteroidia	Flavobacteriales	Weeksellaceae	UBA7623	NA
DTU_2018_799_1_MG_AT_VI_483.vambbin.320	Bacteria	Bacteroidetes	Bacteroidia	Bacteroidales	UBA932	RC9	NA
DTU_2018_799_1_MG_AT_VI_483.vambbin.46558	Bacteria	Firmicutes	Clostridia	Oscillospirales	Oscillospiraceae	UBA5446	NA
DTU_2018_802_1_MG_TD_ND_486.vambbin.10955	Bacteria	Bacteroidetes	Bacteroidia	Flavobacteriales	Weeksellaceae	Chryseobacterium	NA
DTU_2018_802_1_MG_TD_ND_486.vambbin.15203	Bacteria	Verrucomicrobiota	Verrucomicrobiae	Chthoniobacterales	NA	NA	NA
DTU_2018_802_1_MG_TD_ND_486.vambbin.8414	Bacteria	Proteobacteria	Gammaproteobacteria	Burkholderiales	Burkholderiaceae	Hydrogenophaga	NA
DTU_2018_807_1_MG_FR_SA_491.metabin.53	Bacteria	Proteobacteria	Gammaproteobacteria	Pseudomonadales	Moraxellaceae	Psychrobacter	NA
DTU_2018_808_1_MG_GB_FA_492.metabin.19	Bacteria	Bacteroidetes	Bacteroidia	Flavobacteriales	Weeksellaceae	Empedobacter	NA
DTU_2018_808_1_MG_GB_FA_492.metabin.7	Bacteria	Bacteroidetes	Bacteroidia	Chitinophagales	Chitinophagaceae	Parafilimonas	NA
DTU_2018_808_1_MG_GB_FA_492.vambbin.1324	Bacteria	Bacteroidetes	Bacteroidia	Flavobacteriales	Weeksellaceae	Chryseobacterium	NA
DTU_2018_808_1_MG_GB_FA_492.vambbin.3061	Bacteria	Proteobacteria	Gammaproteobacteria	Enterobacterales	Enterobacteriaceae	Kluyvera	NA
DTU_2018_809_1_MG_GB_CA_493.metabin.62	Bacteria	Proteobacteria	Gammaproteobacteria	Burkholderiales	Burkholderiaceae	Ottowia	NA
DTU_2018_809_1_MG_GB_CA_493.vambbin.3301	Bacteria	Proteobacteria	Alphaproteobacteria	Rhodobacterales	Rhodobacteraceae	Pseudorhodobacter	NA
DTU_2018_809_1_MG_GB_CA_493.vambbin.9520	Bacteria	Actinobacteriota	Actinobacteria	Mycobacteriales	Mycobacteriaceae	Dietzia	Dietzia sp002415925
DTU_2018_810_1_MG_GT_GU_494.metabin.11	Bacteria	Firmicutes	Clostridia	Lachnospirales	Lachnospiraceae	NA	NA
DTU_2018_813_1_MG_MG_AN_497.vambbin.1492	Bacteria	Verrucomicrobiota	Verrucomicrobiae	Chthoniobacterales	NA	NA	NA
DTU_2018_815_1_MG_ES_BA_499.metabin.32	Bacteria	Proteobacteria	Gammaproteobacteria	Legionellales	NA	NA	NA
DTU_2018_815_1_MG_ES_BA_499.metabin.40	Bacteria	Proteobacteria	Alphaproteobacteria	Caulobacterales	Caulobacteraceae	Phenylobacterium	NA
DTU_2018_815_1_MG_ES_BA_499.vambbin.16574	Bacteria	Verrucomicrobiota	Verrucomicrobiae	Chthoniobacterales	NA	NA	NA
DTU_2018_815_1_MG_ES_BA_499.vambbin.3616	Bacteria	Actinobacteriota	Actinobacteria	Mycobacteriales	Mycobacteriaceae	Mycolicibacterium	NA
DTU_2018_815_1_MG_ES_BA_499.vambbin.51	Bacteria	Proteobacteria	Alphaproteobacteria	Sphingomonadales	Sphingomonadaceae	Novosphingobium	NA
DTU_2018_816_1_MG_ES_IL_500.metabin.12	Bacteria	Krumholzibacteriota	Krumholzibacteria	LZORAL124-64-63	LZORAL124-64-63	NA	NA
DTU_2018_816_1_MG_ES_IL_500.metabin.20	Bacteria	Verrucomicrobiota	Verrucomicrobiae	Opitutales	Opitutaceae	Lacunisphaera	NA
DTU_2018_816_1_MG_ES_IL_500.metabin.22	Bacteria	Proteobacteria	Alphaproteobacteria	Caulobacterales	Caulobacteraceae	Brevundimonas	NA
DTU_2018_816_1_MG_ES_IL_500.metabin.24	Bacteria	Bacteroidetes	Bacteroidia	Flavobacteriales	PHOS-HE28	PHOS-HE28	NA
DTU_2018_816_1_MG_ES_IL_500.metabin.27	Bacteria	Bacteroidetes	Ignavibacteria	Ignavibacteriales	Ignavibacteriaceae	XYD12-FULL-36-8	NA
DTU_2018_816_1_MG_ES_IL_500.metabin.32	Bacteria	Armatimonadota	Fimbriimonadia	Fimbriimonadales	Fimbriimonadaceae	UBA2391	NA
DTU_2018_816_1_MG_ES_IL_500.metabin.36	Bacteria	Bacteroidetes	Bacteroidia	Cytophagales	Cyclobacteriaceae	ELB16-189	ELB16-189 sp002352225
DTU_2018_816_1_MG_ES_IL_500.metabin.39	Bacteria	Bacteroidetes	Bacteroidia	Flavobacteriales	PHOS-HE28	PHOS-HE28	NA
DTU_2018_816_1_MG_ES_IL_500.metabin.40	Bacteria	Actinobacteriota	Acidimicrobiia	NA	NA	NA	NA
DTU_2018_816_1_MG_ES_IL_500.metabin.59	Bacteria	Proteobacteria	Gammaproteobacteria	Burkholderiales	Burkholderiaceae	Limnohabitans	NA
DTU_2018_816_1_MG_ES_IL_500.metabin.71	Bacteria	Proteobacteria	Alphaproteobacteria	Rhizobiales	Rhizobiaceae	NA	NA
DTU_2018_816_1_MG_ES_IL_500.metabin.7	Bacteria	Krumholzibacteriota	Krumholzibacteria	LZORAL124-64-63	LZORAL124-64-63	NA	NA
DTU_2018_816_1_MG_ES_IL_500.metabin.82	Bacteria	Verrucomicrobiota	Kiritimatiellae	NA	NA	NA	NA
DTU_2018_816_1_MG_ES_IL_500.metabin.90	Bacteria	Bacteroidetes	Bacteroidia	Flavobacteriales	PHOS-HE28	PHOS-HE28	NA
DTU_2018_816_1_MG_ES_IL_500.vambbin.1456	Bacteria	Proteobacteria	Gammaproteobacteria	Burkholderiales	Rhodocyclaceae	Fen-999	NA
DTU_2018_816_1_MG_ES_IL_500.vambbin.149972	Bacteria	Bacteroidetes	Bacteroidia	AKYH767-A	NA	NA	NA
DTU_2018_816_1_MG_ES_IL_500.vambbin.19554	Bacteria	Bacteroidetes	Bacteroidia	Chitinophagales	Saprospiraceae	NA	NA
DTU_2018_816_1_MG_ES_IL_500.vambbin.342550	Bacteria	Planctomycetota	Phycisphaerae	Phycisphaerales	SM1A02	NA	NA
DTU_2018_816_1_MG_ES_IL_500.vambbin.3482	Bacteria	Bacteroidetes	Bacteroidia	Flavobacteriales	PHOS-HE28	PHOS-HE28	NA
DTU_2018_816_1_MG_ES_IL_500.vambbin.585	Bacteria	Proteobacteria	Gammaproteobacteria	Xanthomonadales	Xanthomonadaceae	NA	NA
DTU_2018_816_1_MG_ES_IL_500.vambbin.6579	Bacteria	Proteobacteria	Gammaproteobacteria	Burkholderiales	Burkholderiaceae	Ottowia	NA
DTU_2018_816_1_MG_ES_IL_500.vambbin.9374	Bacteria	Proteobacteria	Alphaproteobacteria	Rhizobiales	Xanthobacteraceae	NA	NA
DTU_2018_817_1_MG_HU_SK_501.metabin.36	Bacteria	Firmicutes	Bacilli	RFN20	CAG-826	NA	NA
DTU_2018_817_1_MG_HU_SK_501.metabin.63	Bacteria	Firmicutes	Clostridia	Christensenellales	CAG-138	Phil1	NA
DTU_2018_821_1_MG_IS_RE_505.vambbin.80489	Bacteria	Desulfobacterota	Desulfobacteria	Desulfobacterales	NA	NA	NA
DTU_2018_822_1_MG_US_CO_506.vambbin.12169	Bacteria	Proteobacteria	Gammaproteobacteria	Burkholderiales	Burkholderiaceae	Thiomonas	NA
DTU_2018_826_1_MG_PT_LI_510.metabin.19	Bacteria	Firmicutes	Clostridia	Christensenellales	CAG-138	UBA7703	NA
DTU_2018_826_1_MG_PT_LI_510.vambbin.1542	Bacteria	Bacteroidetes	Bacteroidia	Bacteroidales	Bacteroidaceae	Prevotella	Prevotella sp002407775
DTU_2018_826_1_MG_PT_LI_510.vambbin.16228	Bacteria	Proteobacteria	Gammaproteobacteria	Burkholderiales	Burkholderiaceae	SCGC-AAA027-K21	NA
DTU_2018_827_1_MG_SA_KA_511.metabin.10	Bacteria	Proteobacteria	Gammaproteobacteria	Competibacterales	Competibacteraceae	Contendobacter	NA
DTU_2018_827_1_MG_SA_KA_511.metabin.82	Bacteria	Desulfobacterota	Desulfobulbia	Desulfobulbales	Desulfobulbaceae	NA	NA
DTU_2018_827_1_MG_SA_KA_511.vambbin.22143	Bacteria	Firmicutes	Negativicutes	Acidaminococcales	Succinispiraceae	NA	NA
DTU_2018_829_1_MG_TH_PA_513.metabin.10	Bacteria	Proteobacteria	Alphaproteobacteria	Rhizobiales	Beijerinckiaceae	Methylocystis	NA
DTU_2018_829_1_MG_TH_PA_513.metabin.27	Bacteria	Verrucomicrobiota	Kiritimatiellae	NA	NA	NA	NA
DTU_2018_829_1_MG_TH_PA_513.vambbin.2736	Bacteria	Proteobacteria	Gammaproteobacteria	Chromatiales	Chromatiaceae	Thiosymbion	NA
DTU_2018_832_1_MG_JP_HI_SB_516.metabin.42	Bacteria	Bacteroidetes	Bacteroidia	Flavobacteriales	Weeksellaceae	Chryseobacterium	NA
DTU_2018_832_1_MG_JP_HI_SB_516.vambbin.48817	Bacteria	Bacteroidetes	Bacteroidia	Flavobacteriales	Flavobacteriaceae	Flavobacterium	NA
DTU_2018_835_1_MG_MT_MT_519.metabin.3	Bacteria	Proteobacteria	Gammaproteobacteria	Enterobacterales	Psychromonadaceae	Psychromonas	Psychromonas arctica
DTU_2018_837_1_MG_BR_RJ_521.vambbin.4055	Bacteria	Chloroflexota	Anaerolineae	Promineofilales	Promineofilaceae	Promineofilum	NA
DTU_2018_837_1_MG_BR_RJ_521.vambbin.65479	Bacteria	Firmicutes	Negativicutes	Veillonellales	Dialisteraceae	NA	NA
DTU_2018_839_1_MG_TZ_MO_523.vambbin.584	Bacteria	Proteobacteria	Gammaproteobacteria	Enterobacterales	Shewanellaceae	Shewanella	Shewanella putrefaciens
DTU_2018_840_1_MG_TZ_MW_524.metabin.13	Bacteria	Proteobacteria	Gammaproteobacteria	Xanthomonadales	Xanthomonadaceae	NA	NA
DTU_2018_844_1_MG_CI_BO_528.vambbin.41249	Bacteria	Cyanobacteria	Cyanobacteriia	Synechococcales	Cyanobiaceae	PCC7001	NA
DTU_2018_846_1_MG_BE_OS_530.vambbin.1553	Bacteria	Bacteroidetes	Bacteroidia	Flavobacteriales	Flavobacteriaceae	Flavobacterium	NA
DTU_2018_847_1_MG_BE_LE_531.metabin.27	Bacteria	Bacteroidetes	Bacteroidia	Flavobacteriales	Flavobacteriaceae	Flavobacterium	NA
DTU_2018_847_1_MG_BE_LE_531.metabin.60	Bacteria	Bacteroidetes	Bacteroidia	Flavobacteriales	Flavobacteriaceae	Flavobacterium	NA
DTU_2018_847_1_MG_BE_LE_531.vambbin.11641	Bacteria	Actinobacteriota	Actinobacteria	Propionibacteriales	Nocardioidaceae	Aeromicrobium	NA
DTU_2018_847_1_MG_BE_LE_531.vambbin.9024	Bacteria	Proteobacteria	Gammaproteobacteria	Pseudomonadales	Moraxellaceae	Psychrobacter	NA
DTU_2018_849_1_MG_BE_DE_533.metabin.47	Bacteria	Proteobacteria	Gammaproteobacteria	Xanthomonadales	Xanthomonadaceae	Pseudoxanthomonas	NA
DTU_2018_849_1_MG_BE_DE_533.vambbin.1125	Bacteria	Proteobacteria	Gammaproteobacteria	Pseudomonadales	Moraxellaceae	NA	NA
DTU_2018_849_1_MG_BE_DE_533.vambbin.22639	Bacteria	Bacteroidetes	Bacteroidia	Flavobacteriales	Weeksellaceae	Chryseobacterium	NA
DTU_2018_849_1_MG_BE_DE_533.vambbin.31385	Bacteria	Bacteroidetes	Bacteroidia	Flavobacteriales	Weeksellaceae	Chryseobacterium	NA
DTU_2018_849_1_MG_BE_DE_533.vambbin.36936	Bacteria	Bacteroidetes	Rhodothermia	Rhodothermales	Rubricoccaceae	NA	NA
DTU_2018_851_1_MG_IN_KO_535.metabin.58	Bacteria	Firmicutes	Clostridia	Oscillospirales	Acutalibacteraceae	UBA1033	NA
DTU_2018_852_1_MG_US_AT_536.metabin.15	Bacteria	Firmicutes	Clostridia	Oscillospirales	Oscillospiraceae	UBA738	NA
DTU_2018_852_1_MG_US_AT_536.metabin.42	Bacteria	Proteobacteria	Alphaproteobacteria	Sphingomonadales	Sphingomonadaceae	UBA1936	NA
DTU_2018_852_1_MG_US_AT_536.metabin.54	Bacteria	Firmicutes	Bacilli	RFN20	UBA1709	NA	NA
DTU_2018_852_1_MG_US_AT_536.metabin.69	Bacteria	Firmicutes	Clostridia	Christensenellales	CAG-138	Phil1	NA
DTU_2018_852_1_MG_US_AT_536.vambbin.78347	Bacteria	Verrucomicrobiota	Kiritimatiellae	LD1-PB3	Lenti-01	Lenti-01	NA
DTU_2018_855_1_MG_MG_AN_3_539.metabin.113	Bacteria	Actinobacteriota	Acidimicrobiia	Microtrichales	Ilumatobacteraceae	NA	NA
DTU_2018_855_1_MG_MG_AN_3_539.metabin.124	Bacteria	Proteobacteria	Alphaproteobacteria	Rhizobiales	Beijerinckiaceae	Alsobacter	NA
DTU_2018_855_1_MG_MG_AN_3_539.metabin.127	Bacteria	Verrucomicrobiota	Verrucomicrobiae	Opitutales	UBA953	UBA8828	NA
DTU_2018_855_1_MG_MG_AN_3_539.metabin.56	Bacteria	Verrucomicrobiota	Verrucomicrobiae	Methylacidiphilales	UBA3015	UBA3015	NA
DTU_2018_855_1_MG_MG_AN_3_539.metabin.60	Bacteria	Actinobacteriota	Actinobacteria	Nanopelagicales	NA	NA	NA
DTU_2018_855_1_MG_MG_AN_3_539.metabin.6	Bacteria	Planctomycetota	Planctomycetes	Pirellulales	UBA1268	BAIKAL-G1-2R	NA
DTU_2018_855_1_MG_MG_AN_3_539.vambbin.17319	Bacteria	Actinobacteriota	Acidimicrobiia	Microtrichales	UBA8139	NA	NA
DTU_2018_855_1_MG_MG_AN_3_539.vambbin.19050	Bacteria	Proteobacteria	Gammaproteobacteria	Burkholderiales	Methylophilaceae	Methylopumilus	NA
DTU_2018_855_1_MG_MG_AN_3_539.vambbin.197240	Bacteria	Actinobacteriota	Actinobacteria	Actinomycetales	Microbacteriaceae	Yonghaparkia	NA
DTU_2018_855_1_MG_MG_AN_3_539.vambbin.23096	Bacteria	Actinobacteriota	Acidimicrobiia	Microtrichales	Ilumatobacteraceae	NA	NA
DTU_2018_855_1_MG_MG_AN_3_539.vambbin.83075	Bacteria	Bacteroidetes	Bacteroidia	Chitinophagales	Chitinophagaceae	NA	NA
DTU_2018_856_1_MG_UG_KA_540.vambbin.11116	Bacteria	Verrucomicrobiota	Kiritimatiellae	LD1-PB3	Lenti-01	Lenti-01	NA
DTU_2018_857_1_MG_MG_AN_4_541.metabin.23	Bacteria	Proteobacteria	Alphaproteobacteria	Acetobacterales	Acetobacteraceae	Roseomonas	NA
DTU_2018_857_1_MG_MG_AN_4_541.metabin.28	Bacteria	Actinobacteriota	Actinobacteria	Propionibacteriales	Nocardioidaceae	NA	NA
DTU_2018_857_1_MG_MG_AN_4_541.metabin.33	Bacteria	Proteobacteria	Alphaproteobacteria	Rhizobiales	Anderseniellaceae	QKVK01	NA
DTU_2018_857_1_MG_MG_AN_4_541.metabin.40	Bacteria	Proteobacteria	Gammaproteobacteria	Burkholderiales	Burkholderiaceae	UBA997	NA
DTU_2018_857_1_MG_MG_AN_4_541.metabin.47	Bacteria	Proteobacteria	Gammaproteobacteria	Xanthomonadales	Ahniellaceae	UDEA-SF1	NA
DTU_2018_857_1_MG_MG_AN_4_541.metabin.50	Bacteria	Armatimonadota	Fimbriimonadia	Fimbriimonadales	Fimbriimonadaceae	UphvI-Ar2	NA
DTU_2018_857_1_MG_MG_AN_4_541.metabin.54	Bacteria	Gemmatimonadota	Gemmatimonadetes	Gemmatimonadales	Gemmatimonadaceae	Gemmatimonas	NA
DTU_2018_857_1_MG_MG_AN_4_541.metabin.5	Bacteria	Bacteroidetes	Kapabacteria	Kapabacteriales	Kapabacteriaceae	UBA10438	NA
DTU_2018_857_1_MG_MG_AN_4_541.metabin.60	Bacteria	Proteobacteria	Alphaproteobacteria	Caulobacterales	Hyphomonadaceae	NA	NA
DTU_2018_857_1_MG_MG_AN_4_541.metabin.7	Bacteria	Proteobacteria	Gammaproteobacteria	Burkholderiales	Burkholderiaceae	UBA4657	UBA4657 sp002405475
DTU_2018_857_1_MG_MG_AN_4_541.metabin.86	Bacteria	Actinobacteriota	Acidimicrobiia	Microtrichales	Ilumatobacteraceae	NA	NA
DTU_2018_857_1_MG_MG_AN_4_541.metabin.89	Bacteria	Planctomycetota	Planctomycetes	Pirellulales	UBA1268	BAIKAL-G1-2R	NA
DTU_2018_857_1_MG_MG_AN_4_541.vambbin.3034	Bacteria	Planctomycetota	Phycisphaerae	Phycisphaerales	SM1A02	UBA2402	NA
DTU_2018_857_1_MG_MG_AN_4_541.vambbin.38227	Bacteria	Armatimonadota	Fimbriimonadia	Fimbriimonadales	Fimbriimonadaceae	NA	NA
DTU_2018_857_1_MG_MG_AN_4_541.vambbin.39571	Bacteria	Proteobacteria	Gammaproteobacteria	Burkholderiales	Burkholderiaceae	Rubrivivax	NA
DTU_2018_857_1_MG_MG_AN_4_541.vambbin.42452	Bacteria	Planctomycetota	Planctomycetes	Isosphaerales	NA	NA	NA
DTU_2018_857_1_MG_MG_AN_4_541.vambbin.54739	Bacteria	Bacteroidetes	Bacteroidia	Chitinophagales	Chitinophagaceae	NA	NA
DTU_2018_859_1_MG_MU_GB_543.metabin.23	Bacteria	Proteobacteria	Alphaproteobacteria	Sphingomonadales	Sphingomonadaceae	Porphyrobacter	NA
DTU_2018_859_1_MG_MU_GB_543.vambbin.1058	Bacteria	Proteobacteria	Gammaproteobacteria	Burkholderiales	Neisseriaceae	Neisseria	NA
DTU_2018_859_1_MG_MU_GB_543.vambbin.16648	Bacteria	Fusobacteriota	Fusobacteriia	Fusobacteriales	Leptotrichiaceae	NA	NA
DTU_2018_859_1_MG_MU_GB_543.vambbin.9121	Bacteria	Desulfobacterota	Desulfovibrionia	Desulfovibrionales	Desulfovibrionaceae	NA	NA
DTU_2018_860_1_MG_IT_NO_544.metabin.20	Bacteria	Armatimonadota	Fimbriimonadia	Fimbriimonadales	Fimbriimonadaceae	NA	NA
DTU_2018_860_1_MG_IT_NO_544.vambbin.15196	Bacteria	Proteobacteria	Gammaproteobacteria	Burkholderiales	Burkholderiaceae	Ottowia	NA
DTU_2018_860_1_MG_IT_NO_544.vambbin.20475	Bacteria	Actinobacteriota	Actinobacteria	Mycobacteriales	Mycobacteriaceae	Gordonia	Gordonia sp002414845
DTU_2018_860_1_MG_IT_NO_544.vambbin.4809	Bacteria	Firmicutes	Bacilli	Lactobacillales	Lactobacillaceae	Lactobacillus	Lactobacillus helveticus
DTU_2018_863_1_MG_IT_CA_547.metabin.38	Bacteria	Proteobacteria	Gammaproteobacteria	Burkholderiales	Neisseriaceae	Vitreoscilla	NA
DTU_2018_863_1_MG_IT_CA_547.vambbin.4920	Bacteria	Proteobacteria	Gammaproteobacteria	Burkholderiales	Burkholderiaceae	Polaromonas	NA
DTU_2018_864_1_MG_CN_NA_548.vambbin.15907	Bacteria	Desulfobacterota	Syntrophia	Syntrophales	Smithellaceae	UBA8904	NA
DTU_2018_865_1_MG_KR_GW_549.metabin.13	Bacteria	Bacteroidetes	Bacteroidia	Bacteroidales	Bacteroidaceae	Paraprevotella	Paraprevotella clara
DTU_2018_865_1_MG_KR_GW_549.metabin.14	Bacteria	Bacteroidetes	Bacteroidia	Bacteroidales	Bacteroidaceae	Bacteroides	Bacteroides uniformis
DTU_2018_865_1_MG_KR_GW_549.metabin.55	Bacteria	Bacteroidetes	Bacteroidia	Bacteroidales	Bacteroidaceae	Bacteroides	Bacteroides ovatus
DTU_2018_865_1_MG_KR_GW_549.metabin.63	Bacteria	Bacteroidetes	Bacteroidia	Bacteroidales	Bacteroidaceae	Bacteroides	Bacteroides
DTU_2018_865_1_MG_KR_GW_549.vambbin.288947	Bacteria	Bacteroidetes	Bacteroidia	Bacteroidales	Bacteroidaceae	Prevotella	NA
DTU_2018_868_1_MG_CH_SU_552.vambbin.17453	Bacteria	Proteobacteria	Gammaproteobacteria	Competibacterales	Competibacteraceae	Contendobacter	NA
DTU_2018_871_1_MG_CH_BR_555.metabin.18	Bacteria	Chloroflexota	Chloroflexia	Chloroflexales	Roseiflexaceae	Kouleothrix	NA
DTU_2018_871_1_MG_CH_BR_555.vambbin.37902	Bacteria	Proteobacteria	Gammaproteobacteria	Competibacterales	Competibacteraceae	Contendobacter	NA
DTU_2018_871_1_MG_CH_BR_555.vambbin.56584	Bacteria	Bacteroidetes	Ignavibacteria	SJA-28	B-1AR	OLB4	OLB4 sp002050165
DTU_2018_871_1_MG_CH_BR_555.vambbin.570	Bacteria	Bacteroidetes	Bacteroidia	Flavobacteriales	Weeksellaceae	NA	NA
DTU_2018_872_1_MG_GB_EB_556.vambbin.3111	Bacteria	Verrucomicrobiota	Lentisphaeria	Victivallales	UBA1829	NA	NA
DTU_2018_872_1_MG_GB_EB_556.vambbin.6054	Bacteria	Bacteroidetes	Bacteroidia	Bacteroidales	Bacteroidaceae	Prevotella	NA
DTU_2018_872_1_MG_GB_EB_556.vambbin.727	Bacteria	Proteobacteria	Gammaproteobacteria	Burkholderiales	Burkholderiaceae	NA	NA
DTU_2018_874_1_MG_BD_DH_558.metabin.17	Bacteria	Firmicutes	Clostridia	Peptostreptococcales	Acidaminobacteraceae	Acidaminobacter	NA
DTU_2018_874_1_MG_BD_DH_558.metabin.19	Bacteria	Firmicutes	Clostridia	Eubacteriales	Alkalibacteraceae	Alkalibacter	Alkalibacter sp003446375
DTU_2018_874_1_MG_BD_DH_558.metabin.40	Bacteria	Firmicutes	Clostridia	Oscillospirales	Ruminococcaceae	D5	NA
DTU_2018_875_1_MG_AU_DD_559.metabin.71	Bacteria	Proteobacteria	Gammaproteobacteria	Burkholderiales	Neisseriaceae	Neisseria	NA
DTU_2018_875_1_MG_AU_DD_559.vambbin.779	Bacteria	Bacteroidetes	Bacteroidia	Bacteroidales	Dysgonomonadaceae	Petrimonas	NA
DTU_2018_876_1_MG_AU_MA_560.vambbin.10802	Bacteria	Actinobacteriota	Actinobacteria	Propionibacteriales	Propionibacteriaceae	Nigerium	NA
DTU_2018_876_1_MG_AU_MA_560.vambbin.1485	Bacteria	Firmicutes	Negativicutes	Selenomonadales	Selenomonadaceae	Mitsuokella	Mitsuokella jalaludinii
DTU_2018_876_1_MG_AU_MA_560.vambbin.1997	Bacteria	Actinobacteriota	Actinobacteria	Actinomycetales	Actinomycetaceae	Actinomyces	NA
DTU_2018_876_1_MG_AU_MA_560.vambbin.23713	Bacteria	UBP3	UBA1439	NA	NA	NA	NA
DTU_2018_876_1_MG_AU_MA_560.vambbin.2618	Bacteria	Acidobacteriota	UBA4820	UBA4820	UBA4820	UBA4820	NA
DTU_2018_876_1_MG_AU_MA_560.vambbin.36812	Bacteria	Proteobacteria	Gammaproteobacteria	Burkholderiales	Rhodocyclaceae	Propionivibrio	NA
DTU_2018_876_1_MG_AU_MA_560.vambbin.5378	Bacteria	Firmicutes	Clostridia	Christensenellales	CAG-138	UBA7703	NA
DTU_2018_876_1_MG_AU_MA_560.vambbin.61330	Bacteria	Bdellovibrionota	UBA2361	UBA2361	NA	NA	NA
DTU_2018_876_1_MG_AU_MA_560.vambbin.70351	Bacteria	Verrucomicrobiota	Kiritimatiellae	LD1-PB3	GWF2-57-35	NA	NA
DTU_2018_877_1_MG_BA_BL_562.vambbin.10610	Bacteria	Proteobacteria	Gammaproteobacteria	Pseudomonadales	Pseudomonadaceae	Pseudomonas	Pseudomonas
DTU_2018_877_1_MG_BA_BL_562.vambbin.1486	Bacteria	Fibrobacterota	Fibrobacteria	Fibrobacterales	Fibrobacteraceae	UBA1313	UBA1313 sp001873075
DTU_2018_878_1_MG_GH_TA_563.metabin.11	Bacteria	Proteobacteria	Alphaproteobacteria	Rhizobiales	Anderseniellaceae	QKVK01	NA
DTU_2018_878_1_MG_GH_TA_563.vambbin.1545	Bacteria	Proteobacteria	Gammaproteobacteria	Burkholderiales	Burkholderiaceae	SCGC-AAA027-K21	NA
DTU_2018_878_1_MG_GH_TA_563.vambbin.8147	Bacteria	Proteobacteria	Gammaproteobacteria	Pseudomonadales	Pseudomonadaceae	Pseudomonas	Pseudomonas
DTU_2018_879_1_MG_JP_JP_564.metabin.41	Bacteria	Proteobacteria	Gammaproteobacteria	Pseudomonadales	Moraxellaceae	Moraxella	NA
DTU_2018_879_1_MG_JP_JP_564.metabin.47	Bacteria	Actinobacteriota	Actinobacteria	Actinomycetales	Microbacteriaceae	73-13	NA
DTU_2018_879_1_MG_JP_JP_564.vambbin.789	Bacteria	Proteobacteria	Alphaproteobacteria	Rhodobacterales	Rhodobacteraceae	UBA1943	NA
DTU_2018_879_1_MG_JP_JP_564.vambbin.8670	Bacteria	Verrucomicrobiota	Verrucomicrobiae	Chthoniobacterales	Terrimicrobiaceae	NA	NA
DTU_2018_881_1_MG_GH_AC_568.metabin.37	Bacteria	Bacteroidetes	Bacteroidia	Bacteroidales	FEN-979	NA	NA
DTU_2018_881_1_MG_GH_AC_568.metabin.46	Bacteria	Firmicutes	Clostridia	Oscillospirales	Oscillospiraceae	UBA5446	NA
DTU_2018_881_1_MG_GH_AC_568.metabin.48	Bacteria	Firmicutes	Bacilli	Lactobacillales	Streptococcaceae	Streptococcus	Streptococcus henryi
DTU_2018_881_1_MG_GH_AC_568.metabin.51	Bacteria	Firmicutes	Bacilli	Erysipelotrichales	Erysipelotrichaceae	NA	NA
DTU_2018_881_1_MG_GH_AC_568.metabin.76	Bacteria	Firmicutes	Clostridia	Christensenellales	CAG-138	NA	NA
DTU_2018_881_1_MG_GH_AC_568.metabin.98	Bacteria	Bacteroidetes	Bacteroidia	Bacteroidales	UBA932	DMER64	DMER64 sp002427525
DTU_2018_881_1_MG_GH_AC_568.vambbin.13723	Bacteria	Sumerlaeota	Sumerlaeia	Sumerlaeales	NA	NA	NA
DTU_2018_881_1_MG_GH_AC_568.vambbin.19870	Bacteria	Firmicutes	Clostridia	Christensenellales	CAG-138	UBA3792	NA
DTU_2018_881_1_MG_GH_AC_568.vambbin.28836	Bacteria	Bacteroidetes	Bacteroidia	Bacteroidales	UBA932	Bact-11	NA
DTU_2018_882_1_MG_GH_AC_2_569.metabin.22	Bacteria	Firmicutes	Bacilli	Lactobacillales	Lactobacillaceae	Lactobacillus	Lactobacillus
DTU_2018_882_1_MG_GH_AC_2_569.metabin.23	Bacteria	Firmicutes	Bacilli	Lactobacillales	Lactobacillaceae	Lactobacillus	Lactobacillus
DTU_2018_882_1_MG_GH_AC_2_569.metabin.36	Bacteria	Verrucomicrobiota	Kiritimatiellae	LD1-PB3	Lenti-01	Lenti-01	NA
DTU_2018_882_1_MG_GH_AC_2_569.metabin.83	Bacteria	Firmicutes	Bacilli	Lactobacillales	Lactobacillaceae	Weissella	NA
DTU_2018_882_1_MG_GH_AC_2_569.vambbin.9876	Bacteria	Firmicutes	Bacilli	Lactobacillales	Lactobacillaceae	Lactobacillus	Lactobacillus
DTU_2018_884_1_MG_CL_SA_571.metabin.43	Bacteria	Firmicutes	Clostridia	Oscillospirales	Oscillospiraceae	UBA2658	NA
DTU_2018_885_1_MG_CL_SA_2_572.metabin.38	Bacteria	Chloroflexota	Anaerolineae	Anaerolineales	Anaerolineaceae	UBA6107	NA
DTU_2018_886_1_MG_NG_IL_573.metabin.19	Bacteria	Nitrospirota	Nitrospiria	Nitrospirales	Nitrospiraceae	Nitrospira	NA
DTU_2018_886_1_MG_NG_IL_573.metabin.29	Bacteria	Actinobacteriota	Actinobacteria	Propionibacteriales	Propionibacteriaceae	NA	NA
DTU_2018_886_1_MG_NG_IL_573.metabin.34	Bacteria	Proteobacteria	Gammaproteobacteria	Burkholderiales	Burkholderiaceae	Brachymonas	NA
DTU_2018_886_1_MG_NG_IL_573.metabin.3	Bacteria	Firmicutes	Negativicutes	UBA1444	UBA1444	UBA1444	NA
DTU_2018_886_1_MG_NG_IL_573.metabin.40	Bacteria	UBA10199	UBA10199	2-02-FULL-44-16	NA	NA	NA
DTU_2018_886_1_MG_NG_IL_573.metabin.43	Bacteria	Proteobacteria	Gammaproteobacteria	Burkholderiales	Hydrogenophilaceae	UBA3361	NA
DTU_2018_886_1_MG_NG_IL_573.metabin.46	Bacteria	Proteobacteria	Gammaproteobacteria	Methylococcales	Methylococcaceae	Methylocaldum	Methylocaldum sp002005105
DTU_2018_886_1_MG_NG_IL_573.metabin.47	Bacteria	Hydrogenedentota	Hydrogenedentia	Hydrogenedentiales	NA	NA	NA
DTU_2018_886_1_MG_NG_IL_573.vambbin.16601	Bacteria	Actinobacteriota	Actinobacteria	Actinomycetales	Actinomycetaceae	NA	NA
DTU_2018_886_1_MG_NG_IL_573.vambbin.18566	Bacteria	Proteobacteria	Gammaproteobacteria	Burkholderiales	Burkholderiaceae	SCGC-AAA027-K21	NA
DTU_2018_886_1_MG_NG_IL_573.vambbin.472	Bacteria	Bacteroidetes	Bacteroidia	Bacteroidales	UBA932	Bact-08	NA
DTU_2018_886_1_MG_NG_IL_573.vambbin.5448	Bacteria	Proteobacteria	Gammaproteobacteria	Chromatiales	Chromatiaceae	Thiosymbion	NA
DTU_2018_887_1_MG_GR_TH_574.metabin.35	Bacteria	Bacteroidetes	Bacteroidia	Bacteroidales	Prolixibacteraceae	UBA1413	NA
DTU_2018_887_1_MG_GR_TH_574.metabin.39	Bacteria	Bacteroidetes	Bacteroidia	Chitinophagales	Chitinophagaceae	JJ008	NA
DTU_2018_887_1_MG_GR_TH_574.metabin.3	Bacteria	Verrucomicrobiota	Kiritimatiellae	NA	NA	NA	NA
DTU_2018_887_1_MG_GR_TH_574.metabin.40	Bacteria	UBP3	UBA1439	UBA1439	UBA1439	UBA1439	UBA1439 sp002329605
DTU_2018_887_1_MG_GR_TH_574.metabin.44	Bacteria	Proteobacteria	Gammaproteobacteria	Burkholderiales	Nitrosomonadaceae	Nitrosomonas	NA
DTU_2018_887_1_MG_GR_TH_574.metabin.56	Archaea	Halobacterota	Methanomicrobia	Methanomicrobiales	Methanoregulaceae	SD8	NA
DTU_2018_887_1_MG_GR_TH_574.metabin.71	Bacteria	Bacteroidetes	Ignavibacteria	SJA-28	OLB5	OLB5	NA
DTU_2018_887_1_MG_GR_TH_574.metabin.75	Bacteria	Bacteroidetes	Bacteroidia	Flavobacteriales	PHOS-HE28	PHOS-HE28	NA
DTU_2018_887_1_MG_GR_TH_574.vambbin.2805	Bacteria	KSB1	UBA2214	UBA2214	UBA2214	NA	NA
DTU_2018_887_1_MG_GR_TH_574.vambbin.37558	Bacteria	Proteobacteria	Gammaproteobacteria	Burkholderiales	Burkholderiaceae	Ottowia	NA
DTU_2018_889_1_MG_BB_BR_576.metabin.10	Bacteria	Verrucomicrobiota	Verrucomicrobiae	Verrucomicrobiales	DEV007	Arctic95D-9	NA
DTU_2018_889_1_MG_BB_BR_576.metabin.1	Bacteria	Chloroflexota	Anaerolineae	Promineofilales	Promineofilaceae	NA	NA
DTU_2018_889_1_MG_BB_BR_576.metabin.34	Bacteria	Proteobacteria	Alphaproteobacteria	Caulobacterales	Parvularculaceae	CV81	NA
DTU_2018_889_1_MG_BB_BR_576.metabin.35	Bacteria	Proteobacteria	Gammaproteobacteria	Burkholderiales	Burkholderiaceae	NA	NA
DTU_2018_889_1_MG_BB_BR_576.metabin.38	Bacteria	Proteobacteria	Gammaproteobacteria	Steroidobacterales	Steroidobacteraceae	NA	NA
DTU_2018_889_1_MG_BB_BR_576.metabin.45	Bacteria	Bacteroidetes	Bacteroidia	Chitinophagales	Saprospiraceae	NA	NA
DTU_2018_889_1_MG_BB_BR_576.metabin.4	Bacteria	Actinobacteriota	Acidimicrobiia	Microtrichales	Microtrichaceae	IMCC26207	NA
DTU_2018_889_1_MG_BB_BR_576.metabin.54	Bacteria	Bacteroidetes	Bacteroidia	Chitinophagales	Saprospiraceae	UBA3362	NA
DTU_2018_889_1_MG_BB_BR_576.metabin.56	Bacteria	Proteobacteria	Alphaproteobacteria	Rhodobacterales	Rhodobacteraceae	NA	NA
DTU_2018_889_1_MG_BB_BR_576.metabin.69	Bacteria	Proteobacteria	Gammaproteobacteria	Burkholderiales	Burkholderiaceae	Ottowia	NA
DTU_2018_889_1_MG_BB_BR_576.metabin.77	Bacteria	Bacteroidetes	Bacteroidia	Chitinophagales	Saprospiraceae	NA	NA
DTU_2018_889_1_MG_BB_BR_576.metabin.7	Bacteria	Proteobacteria	Alphaproteobacteria	Rhizobiales	Xanthobacteraceae	Blastochloris	NA
DTU_2018_889_1_MG_BB_BR_576.vambbin.163292	Bacteria	Verrucomicrobiota	Kiritimatiellae	SS1-B-03-39	NA	NA	NA
DTU_2018_889_1_MG_BB_BR_576.vambbin.30968	Bacteria	Acidobacteriota	Blastocatellia	Pyrinomonadales	Pyrinomonadaceae	NA	NA
DTU_2018_889_1_MG_BB_BR_576.vambbin.4165	Bacteria	Proteobacteria	Alphaproteobacteria	Rhodospirillales	2-12-FULL-67-15	NA	NA
DTU_2018_890_1_MG_NG_IL_2_577.vambbin.102361	Bacteria	Firmicutes	Clostridia	Oscillospirales	Ruminococcaceae	NA	NA
DTU_2018_890_1_MG_NG_IL_2_577.vambbin.127502	Bacteria	Firmicutes	Clostridia	Christensenellales	Christensenellaceae	NA	NA
DTU_2018_890_1_MG_NG_IL_2_577.vambbin.1371	Bacteria	Firmicutes	Clostridia	Eubacteriales	Anaerofustaceae	NA	NA
DTU_2018_890_1_MG_NG_IL_2_577.vambbin.15051	Bacteria	Desulfobacterota	Syntrophia	Syntrophales	Fen-1087	Fen-1087	NA
DTU_2018_890_1_MG_NG_IL_2_577.vambbin.18582	Bacteria	Firmicutes	Negativicutes	UBA1444	UBA1444	UBA1444	NA
DTU_2018_890_1_MG_NG_IL_2_577.vambbin.23326	Bacteria	Actinobacteriota	Coriobacteriia	Coriobacteriales	Eggerthellaceae	Gordonibacter	NA
DTU_2018_890_1_MG_NG_IL_2_577.vambbin.31177	Bacteria	Proteobacteria	Gammaproteobacteria	Cardiobacteriales	Wohlfahrtiimonadaceae	NA	NA
DTU_2018_890_1_MG_NG_IL_2_577.vambbin.62508	Bacteria	Desulfobacterota	Desulfovibrionia	Desulfovibrionales	Desulfovibrionaceae	NA	NA
DTU_2018_890_1_MG_NG_IL_2_577.vambbin.671	Bacteria	Verrucomicrobiota	Kiritimatiellae	RFP12	UBA3636	NA	NA
DTU_2018_890_1_MG_NG_IL_2_577.vambbin.6908	Bacteria	Firmicutes	Clostridia	Eubacteriales	Eubacteriaceae	Eubacterium	Eubacterium
DTU_2018_890_1_MG_NG_IL_2_577.vambbin.7130	Bacteria	Firmicutes	Clostridia	Christensenellales	CAG-138	UBA7703	NA
DTU_2018_894_1_MG_ES_SA_581.vambbin.32411	Bacteria	Proteobacteria	Gammaproteobacteria	Burkholderiales	Burkholderiaceae	Ramlibacter	NA
DTU_2018_895_1_MG_PT_PO_582.vambbin.2474	Bacteria	Proteobacteria	Gammaproteobacteria	Burkholderiales	Burkholderiaceae	Comamonas	NA
DTU_2018_895_1_MG_PT_PO_582.vambbin.6400	Bacteria	Proteobacteria	Gammaproteobacteria	Pseudomonadales	Moraxellaceae	Moraxella	NA
DTU_2018_897_1_MG_FI_OU_584.metabin.19	Bacteria	Armatimonadota	Fimbriimonadia	Fimbriimonadales	Fimbriimonadaceae	NA	NA
DTU_2018_899_1_MG_FI_TU_585.metabin.14	Bacteria	Proteobacteria	Alphaproteobacteria	Caulobacterales	Hyphomonadaceae	UBA7672	NA
DTU_2018_899_1_MG_FI_TU_585.metabin.37	Bacteria	Proteobacteria	Gammaproteobacteria	Burkholderiales	Rhodocyclaceae	Dechloromonas	NA
DTU_2018_901_2_MG_FI_HE_586_re_1.vambbin.14780	Bacteria	Proteobacteria	Alphaproteobacteria	Rhodobacterales	Rhodobacteraceae	Rhodobacter	Rhodobacter
DTU_2018_905_1_MG_CA_OT_590.metabin.9	Bacteria	Proteobacteria	Alphaproteobacteria	Reyranellales	Reyranellaceae	Reyranella	NA
DTU_2018_905_1_MG_CA_OT_590.vambbin.3352	Bacteria	Proteobacteria	Gammaproteobacteria	Competibacterales	Competibacteraceae	Contendobacter	NA
DTU_2018_906_1_MG_MZ_MA_591.vambbin.429	Bacteria	Proteobacteria	Gammaproteobacteria	Pseudomonadales	Pseudomonadaceae	Pseudomonas	Pseudomonas
DTU_2018_906_1_MG_MZ_MA_591.vambbin.4366	Bacteria	Proteobacteria	Gammaproteobacteria	Enterobacterales	Enterobacteriaceae	Rahnella	NA
DTU_2018_910_1_MG_ME_PO_595.vambbin.521	Bacteria	Proteobacteria	Gammaproteobacteria	Pseudomonadales	Pseudomonadaceae	Pseudomonas	NA
DTU_2018_911_1_MG_SG_JU_596.vambbin.348	Bacteria	Proteobacteria	Alphaproteobacteria	Rhodobacterales	Rhodobacteraceae	Pseudoruegeria	NA
DTU_2018_911_1_MG_SG_JU_596.vambbin.4855	Bacteria	Fusobacteriota	Fusobacteriia	Fusobacteriales	Leptotrichiaceae	Leptotrichia	NA
DTU_2018_912_1_MG_CM_YA_597.vambbin.7799	Bacteria	Firmicutes	Bacilli	Lactobacillales	Lactobacillaceae	Leuconostoc	NA
DTU_2018_913_1_MG_RS_BE_598.vambbin.11874	Bacteria	Firmicutes	Clostridia	Oscillospirales	Oscillospiraceae	CAG-170	NA
DTU_2018_913_1_MG_RS_BE_598.vambbin.8928	Bacteria	Proteobacteria	Gammaproteobacteria	Burkholderiales	Burkholderiaceae	B-9	NA
DTU_2018_915_1_MG_NZ_CH_600.vambbin.197	Bacteria	Desulfobacterota	Desulfovibrionia	Desulfovibrionales	Desulfovibrionaceae	Desulfovibrio	NA
DTU_2018_915_1_MG_NZ_CH_600.vambbin.4759	Bacteria	Proteobacteria	Gammaproteobacteria	Burkholderiales	Burkholderiaceae	Ottowia	Ottowia sp003008535
DTU_2018_915_1_MG_NZ_CH_600.vambbin.479	Bacteria	Firmicutes	Bacilli	Lactobacillales	Carnobacteriaceae	Carnobacterium	Carnobacterium maltaromaticum
DTU_2018_915_1_MG_NZ_CH_600.vambbin.78526	Bacteria	Firmicutes	Bacilli	Lactobacillales	Streptococcaceae	Streptococcus	Streptococcus parauberis
DTU_2018_917_1_MG_DK_VA_602.metabin.19	Bacteria	Proteobacteria	Gammaproteobacteria	Competibacterales	Competibacteraceae	UBA2383	NA
DTU_2018_920_1_MG_GL_SI_604.metabin.24	Bacteria	Proteobacteria	Gammaproteobacteria	Enterobacterales	Enterobacteriaceae	Mangrovibacter	NA
DTU_2018_920_1_MG_GL_SI_604.vambbin.4127	Bacteria	Proteobacteria	Gammaproteobacteria	Pseudomonadales	Moraxellaceae	Acinetobacter	Acinetobacter celticus
DTU_2018_921_1_MG_BJ_CT_605.metabin.22	Bacteria	Proteobacteria	Alphaproteobacteria	Rhodobacterales	Rhodobacteraceae	Thioclava	Thioclava arenosa
DTU_2018_922_1_MG_BJ_TO_606.metabin.16	Bacteria	Bacteroidetes	Bacteroidia	Bacteroidales	Dysgonomonadaceae	Proteiniphilum	NA
DTU_2018_923_2_MG_BJ_TO_606_re_1.metabin.13	Bacteria	Synergistota	Synergistia	Synergistales	Thermovirgaceae	58-81	NA
DTU_2018_924_1_MG_BJ_AZ_607.metabin.25	Bacteria	Bacteroidetes	Bacteroidia	AKYH767-A	OLB10	OLB10	OLB10 sp001567275
DTU_2018_924_1_MG_BJ_AZ_607.metabin.60	Bacteria	Proteobacteria	Gammaproteobacteria	Burkholderiales	Palsa-1005	PALSA-1003	NA
DTU_2018_926_1_MG_MY_PB_609.metabin.61	Bacteria	Bacteroidetes	Bacteroidia	Bacteroidales	Rikenellaceae	Alistipes	Alistipes putredinis
DTU_2018_929_1_MG_TG_LO_612.metabin.25	Bacteria	Proteobacteria	Alphaproteobacteria	Rhodobacterales	Rhodobacteraceae	Rhodobacter	Rhodobacter
DTU_2018_929_1_MG_TG_LO_612.metabin.30	Bacteria	Proteobacteria	Gammaproteobacteria	Competibacterales	Competibacteraceae	Contendobacter	NA
DTU_2018_929_1_MG_TG_LO_612.vambbin.913	Bacteria	Synergistota	Synergistia	Synergistales	Aminiphilaceae	NA	NA
DTU_2018_930_1_MG_AE_DU_613.metabin.26	Bacteria	Actinobacteriota	Actinobacteria	Mycobacteriales	Mycobacteriaceae	Rhodococcus	Rhodococcus ruber
DTU_2018_933_1_MG_CO_MO_615.vambbin.73981	Bacteria	Proteobacteria	Alphaproteobacteria	Rhizobiales	Pleomorphomonadaceae	Prosthecomicrobium	NA
DTU_2018_935_1_MG_CO_BU_1_617.metabin.18	Bacteria	Firmicutes	Bacilli	Lactobacillales	Aerococcaceae	Trichococcus	Trichococcus flocculiformis
DTU_2018_936_1_MG_CO_BU_2_618.vambbin.11488	Bacteria	Firmicutes	Bacilli	Lactobacillales	Enterococcaceae	Enterococcus	NA
DTU_2018_937_1_MG_CO_BU_3_619.metabin.8	Bacteria	Acidobacteriota	Aminicenantia	UBA2199	UBA2199	UBA2199	NA
DTU_2018_937_1_MG_CO_BU_3_619.vambbin.138024	Bacteria	Firmicutes	Bacilli	Lactobacillales	Streptococcaceae	Streptococcus	Streptococcus pasteurianus
DTU_2018_937_1_MG_CO_BU_3_619.vambbin.33253	Bacteria	Firmicutes	Clostridia	Christensenellales	CAG-138	CAG-1024	CAG-1024 sp000432015
DTU_2018_937_1_MG_CO_BU_3_619.vambbin.7696	Bacteria	Bacteroidetes	Bacteroidia	Bacteroidales	Bacteroidaceae	Prevotella	Prevotella sp003447235
DTU_2018_937_1_MG_CO_BU_3_619.vambbin.8561	Bacteria	Bacteroidetes	Bacteroidia	Bacteroidales	Bacteroidaceae	Prevotellamassilia	NA
DTU_2018_943_1_MG_CO_BU_9_625.vambbin.1450	Bacteria	Proteobacteria	Gammaproteobacteria	Pseudomonadales	Moraxellaceae	Psychrobacter	NA
DTU_2018_944_1_MG_PK_HY_a_626.metabin.49	Bacteria	Firmicutes	Negativicutes	NA	NA	NA	NA
DTU_2018_944_1_MG_PK_HY_a_626.metabin.60	Bacteria	Proteobacteria	Gammaproteobacteria	21-64-14	21-64-14	NA	NA
DTU_2018_944_1_MG_PK_HY_a_626.metabin.77	Bacteria	Proteobacteria	Alphaproteobacteria	Rhodobacterales	Rhodobacteraceae	Rhodobacter	NA
DTU_2018_945_1_MG_US_CH_2_627.metabin.27	Bacteria	Acidobacteriota	Blastocatellia	Pyrinomonadales	Pyrinomonadaceae	OLB17	NA
DTU_2018_946_1_MG_US_HO_2_628.metabin.35	Bacteria	Bacteroidetes	Bacteroidia	Cytophagales	Cyclobacteriaceae	UBA2336	NA
DTU_2018_946_1_MG_US_HO_2_628.vambbin.23949	Bacteria	Proteobacteria	Gammaproteobacteria	Xanthomonadales	Xanthomonadaceae	Aquimonas	Aquimonas sp002352135
DTU_2018_946_1_MG_US_HO_2_628.vambbin.30186	Bacteria	Bacteroidetes	Bacteroidia	Chitinophagales	Saprospiraceae	NA	NA
DTU_2018_947_1_MG_NG_IB_629.metabin.17	Bacteria	Bacteroidetes	Bacteroidia	Bacteroidales	Muribaculaceae	C941	NA
DTU_2018_947_1_MG_NG_IB_629.metabin.21	Bacteria	Firmicutes	Clostridia	Oscillospirales	Oscillospiraceae	CAG-103	NA
DTU_2018_947_1_MG_NG_IB_629.metabin.29	Bacteria	Firmicutes	Clostridia	Christensenellales	CAG-138	NA	NA
DTU_2018_947_1_MG_NG_IB_629.vambbin.1495	Bacteria	Chloroflexota	Anaerolineae	Anaerolineales	Anaerolineaceae	T78	NA
DTU_2018_947_1_MG_NG_IB_629.vambbin.328	Bacteria	Proteobacteria	Gammaproteobacteria	Pseudomonadales	Moraxellaceae	Acinetobacter	NA
DTU_2018_948_2_MG_NG_IB_629_re_1.metabin.102	Bacteria	Firmicutes	Bacilli	RF39	CAG-1000	CAG-460	CAG-460 sp000437355
DTU_2018_948_2_MG_NG_IB_629_re_1.metabin.106	Bacteria	Proteobacteria	Gammaproteobacteria	Pseudomonadales	Moraxellaceae	Acinetobacter	Acinetobacter sp002135245
DTU_2018_948_2_MG_NG_IB_629_re_1.metabin.22	Bacteria	Firmicutes	Clostridia	Lachnospirales	Lachnospiraceae	Butyrivibrio	Butyrivibrio
DTU_2018_948_2_MG_NG_IB_629_re_1.metabin.60	Bacteria	Firmicutes	Negativicutes	Acidaminococcales	Acidaminococcaceae	Phascolarctobacterium	NA
DTU_2018_948_2_MG_NG_IB_629_re_1.metabin.66	Bacteria	Bacteroidetes	Bacteroidia	Bacteroidales	vadinHA17	SR-FBR-E99	NA
DTU_2018_948_2_MG_NG_IB_629_re_1.vambbin.43922	Bacteria	Bacteroidetes	Bacteroidia	Bacteroidales	FEN-979	FEN-979	NA
DTU_2018_949_1_MG_CI_BO_2_630.metabin.61	Bacteria	Chloroflexota	Ellin6529	CSP1-4	CSP1-4	NA	NA
DTU_2018_949_1_MG_CI_BO_2_630.vambbin.5953	Bacteria	Proteobacteria	Gammaproteobacteria	Burkholderiales	Burkholderiaceae	Comamonas	Comamonas aquatica
DTU_2018_979_1_MG_CM1801_L24.metabin.69	Bacteria	Firmicutes	Clostridia	Saccharofermentanales	Saccharofermentanaceae	NA	NA
DTU_2018_979_1_MG_CM1801_L24.vambbin.1057	Bacteria	Verrucomicrobiota	Verrucomicrobiae	Verrucomicrobiales	NA	NA	NA
DTU_2018_999_1_MG_AU1801_L44.vambbin.660	Bacteria	Firmicutes	Negativicutes	Veillonellales	Veillonellaceae	Veillonella	NA
DTU_2018_999_1_MG_AU1801_L44.vambbin.9745	Bacteria	Proteobacteria	Gammaproteobacteria	Pseudomonadales	Moraxellaceae	Psychrobacter	NA
DTU_2019_1040_1_MG_CM1805_L97.vambbin.13470	Bacteria	Chloroflexota	Anaerolineae	Anaerolineales	Anaerolineaceae	UBA6107	NA
DTU_2019_1041_1_MG_CM1802_L98.metabin.29	Bacteria	Bacteroidetes	Bacteroidia	Flavobacteriales	Weeksellaceae	Cloacibacterium	NA
DTU_2019_1041_1_MG_CM1802_L98.vambbin.2630	Bacteria	Proteobacteria	Gammaproteobacteria	Burkholderiales	Burkholderiaceae	Comamonas	Comamonas
